# Supplementary material for: Chalcogen complexes of anionic N-heterocyclic carbenes
Source: Royal Society of Chemistry journal article supplement (doi:10.1039/d0dt02392b), 2020-01-01
Supplement: d0dt02392b2.pdf [file d0dt02392b2.pdf]

## Supporting Information

Luong Phong Ho, Lukas Körner, Thomas Bannenberg, Matthias Tamm\*<sup>[a]</sup>

[a] Institut für Anorganische und Analytische Chemie, Technische Universität Braunschweig, Hagenring 30, 38106 Braunschweig, Germany. Fax: +49 (531) 391 5387; Tel: +49 (531) 391 5309; E-Mail: [m.tamm@tu-bs.de](mailto:m.tamm@tu-bs.de)

### Content

|                                                                                                             |    |
|-------------------------------------------------------------------------------------------------------------|----|
| S1 Crystallographic details .....                                                                           | 2  |
| S1.1 (THF) <sub>3</sub> Li[(IDipp)=S] ( <b>4</b> ) .....                                                    | 3  |
| S1.2 [(WCA-IDipp)O]Li(THF) <sub>3</sub> ( <b>6</b> ·3THF) .....                                             | 5  |
| S1.3 [(WCA-IDipp)S]Li(THF) <sub>3</sub> ( <b>7</b> ·5THF) .....                                             | 7  |
| S1.4 [(WCA-IDipp)Se]Li(OEt <sub>2</sub> ) <sub>3</sub> ( <b>8</b> ·3Et <sub>2</sub> O) .....                | 9  |
| S1.5 [(WCA-IDipp)Te]Li(OEt <sub>2</sub> ) <sub>3</sub> ( <b>9</b> ·2Et <sub>2</sub> O·2THF) .....           | 11 |
| S1.6 (WCA-IDipp)OH ( <b>10</b> ·toluene) .....                                                              | 13 |
| S1.7 (WCA-IDipp)SH ( <b>11</b> ) .....                                                                      | 15 |
| S1.8 (WCA-IDipp)SeH ( <b>12</b> ·toluene) .....                                                             | 17 |
| S1.9 (WCA-IDipp) <sub>2</sub> S <sub>2</sub> ( <b>13</b> ·2 <i>n</i> -hexane·THF) .....                     | 19 |
| S1.10 (WCA-IDipp) <sub>2</sub> Se <sub>2</sub> ( <b>14</b> · <i>n</i> -hexane·PhCl) .....                   | 21 |
| S1.11 (WCA-IDipp) <sub>2</sub> Se <sub>2</sub> ( <b>14'</b> ) .....                                         | 24 |
| S2 <sup>1</sup> H, <sup>11</sup> B, <sup>13</sup> C, <sup>19</sup> F and <sup>77</sup> Se NMR Spectra ..... | 27 |
| S2.1 (THF) <sub>3</sub> Li[(IDipp)=S] ( <b>4</b> ) .....                                                    | 27 |
| S2.2 [(WCA-IDipp)O]Li·3THF ( <b>6</b> ·3THF) .....                                                          | 29 |
| S2.3 [(WCA-IDipp)S]Li·5THF ( <b>7</b> ·5THF) .....                                                          | 33 |
| S2.4 [(WCA-IDipp)Se]Li·3Et <sub>2</sub> O ( <b>8</b> ·3Et <sub>2</sub> O) .....                             | 37 |
| S2.5 [(WCA-IDipp)Te]Li·2Et <sub>2</sub> O·2THF ( <b>9</b> ·2Et <sub>2</sub> O·2THF) .....                   | 42 |
| S2.6 (WCA-IDipp)OH ( <b>10</b> ) .....                                                                      | 46 |
| S2.7 (WCA-IDipp)SH ( <b>11</b> ) .....                                                                      | 50 |
| S2.8 (WCA-IDipp)SeH ( <b>12</b> ) .....                                                                     | 54 |
| S2.9 (WCA-IDipp) <sub>2</sub> S <sub>2</sub> ( <b>13</b> ) .....                                            | 59 |
| S2.10 (WCA-IDipp) <sub>2</sub> Se <sub>2</sub> ( <b>14</b> ) .....                                          | 63 |
| S3 Computational Details .....                                                                              | 68 |
| S4 References .....                                                                                         | 72 |

## S1 Crystallographic details

Suitable single crystals were mounted on a hair or on a MiTiGen mount in perfluorinated inert oil. The intensity measurements were performed at 100 K on an Oxford Diffraction Nova A and a Rigaku XtaLAB Synergy S Single Source diffractometer using mirror-focused CuK $\alpha$  radiation or on an Oxford Diffraction Eos using monochromated MoK $\alpha$  radiation. The diffractometer software CrysAlisPRO was employed.<sup>[1]</sup> Absorption corrections were based on multiscans. The structures were refined anisotropically on  $F^2$  using SHELXL-2017/1 or -2018/3.<sup>[2]</sup> Hydrogen atoms were included using a riding model or rigid methyl groups. Further details are given in Table S1-11.

*Solvent content:* Sulfur species **4** contains three coordinated THF molecules per asymmetric unit; all three are ordered. Oxygen species **6** contains three coordinated THF molecules per asymmetric unit; two are ordered, one is disordered over two positions. Species **7** contains four coordinated THF molecules and one co-crystallized THF molecule per asymmetric unit; all THF molecules are disordered over two positions. Selenium species **8** contains three coordinated Et<sub>2</sub>O molecules per asymmetric unit; all three are disordered over two positions. Tellurium species **9** contains two coordinated THF and two coordinated Et<sub>2</sub>O molecules per asymmetric unit; all coordinated solvent molecules are ordered. Oxygen species **10** contains one toluene molecule per asymmetric unit, which is disordered over two positions. Selenium species **12** contains one toluene molecule per asymmetric unit; it is ordered. Disulfide **13** contains one THF and two *n*hexane molecules per asymmetric unit; all solvent molecules are ordered. Diselenide **14** contains one chlorobenzene and one *n*hexane molecule per asymmetric unit; the chlorobenzene molecule is ordered, the *n*hexane molecule is disordered over two positions.

*Exceptions and special details:* The disordered solvent molecules were refined using appropriate restraints to improve stability of refinement, but the dimensions are not entirely satisfactory and should be interpreted with caution. The solvent molecules in molecular structure **14'** could not be modeled and the residual electron density was removed with SQUEEZE. The used solvent for crystallization was toluene and there were several positions possible for the disordered molecule. Refinement with disorder models was insufficient due to the many positions.

Complete data have been deposited with the Cambridge Crystallographic Data Centre under the CCDC numbers 2013320–2013330 for compounds **4** and **6–14**. These data can be obtained free of charge from <http://www.ccdc.cam.ac.uk/>.

**S1.1** (THF)<sub>3</sub>Li[(IDipp)=S] (**4**)**Table S1.** Crystallographic data for compound **4**.

|                                     |                                                                                               |                            |
|-------------------------------------|-----------------------------------------------------------------------------------------------|----------------------------|
| Compound                            | <b>4</b>                                                                                      |                            |
| Identification code                 | 2013320                                                                                       |                            |
| Empirical formula                   | C <sub>39</sub> H <sub>59</sub> LiN <sub>2</sub> O <sub>3</sub> S                             |                            |
| Formula weight                      | 642.88                                                                                        |                            |
| Temperature                         | 100(2) K                                                                                      |                            |
| Wavelength                          | 0.71073 Å                                                                                     |                            |
| Instrument (scan mode)              | XtaLAB Synergy, Single source at offset/far, HyPix ( $\omega$ scan)                           |                            |
| Crystal system                      | Triclinic                                                                                     |                            |
| Space group                         | P-1                                                                                           |                            |
| Unit cell dimensions                | a = 10.3854(2) Å                                                                              | $\alpha = 73.147(2)^\circ$ |
|                                     | b = 10.9362(2) Å                                                                              | $\beta = 78.248(2)^\circ$  |
|                                     | c = 18.6719(4) Å                                                                              | $\gamma = 69.152(2)^\circ$ |
| Volume                              | 1884.72(7) Å <sup>3</sup>                                                                     |                            |
| Z                                   | 2                                                                                             |                            |
| Density (calculated)                | 1.133 Mg/m <sup>3</sup>                                                                       |                            |
| Absorption coefficient              | 0.123 mm <sup>-1</sup>                                                                        |                            |
| F(000)                              | 700                                                                                           |                            |
| Crystal habitus                     | prism (colourless)                                                                            |                            |
| Crystal size                        | 0.337 x 0.105 x 0.089 mm <sup>3</sup>                                                         |                            |
| Theta range for data collection     | 2.578 to 31.140°                                                                              |                            |
| Index ranges                        | -14 ≤ h ≤ 13, -14 ≤ k ≤ 15, -25 ≤ l ≤ 25                                                      |                            |
| Reflections collected               | 100742                                                                                        |                            |
| Independent reflections             | 10317 [R(int) = 0.0638]                                                                       |                            |
| Completeness to theta = 25.242°     | 99.9 %                                                                                        |                            |
| Absorption correction               | Gaussian                                                                                      |                            |
| Max. and min. transmission          | 1.000 and 0.459                                                                               |                            |
| Refinement method                   | Full-matrix least-squares on F <sup>2</sup>                                                   |                            |
| Data / restraints / parameters      | 10317 / 0 / 423                                                                               |                            |
| Goodness-of-fit on F <sup>2</sup>   | 1.054                                                                                         |                            |
| Final R indices [I > 2σ(I)]         | R1 = 0.0374, wR2 = 0.0976                                                                     |                            |
| R indices (all data)                | R1 = 0.0432, wR2 = 0.1006                                                                     |                            |
| Largest diff. peak and hole         | 0.461 and -0.227 e.Å <sup>-3</sup>                                                            |                            |
| Crystallisation Details:            | A saturated solution of Li[IDippS] · 3thf in thf was layered with hexane at room temperature. |                            |
| Solution                            | SHELXT-2014/5 (Sheldrick 2015)                                                                |                            |
| Refinement                          | SHELXL-2018/3 (Sheldrick 2018)                                                                |                            |
| Interface                           | OLEX2 v1.2                                                                                    |                            |
| Measurement and Refinement Details: | -                                                                                             |                            |

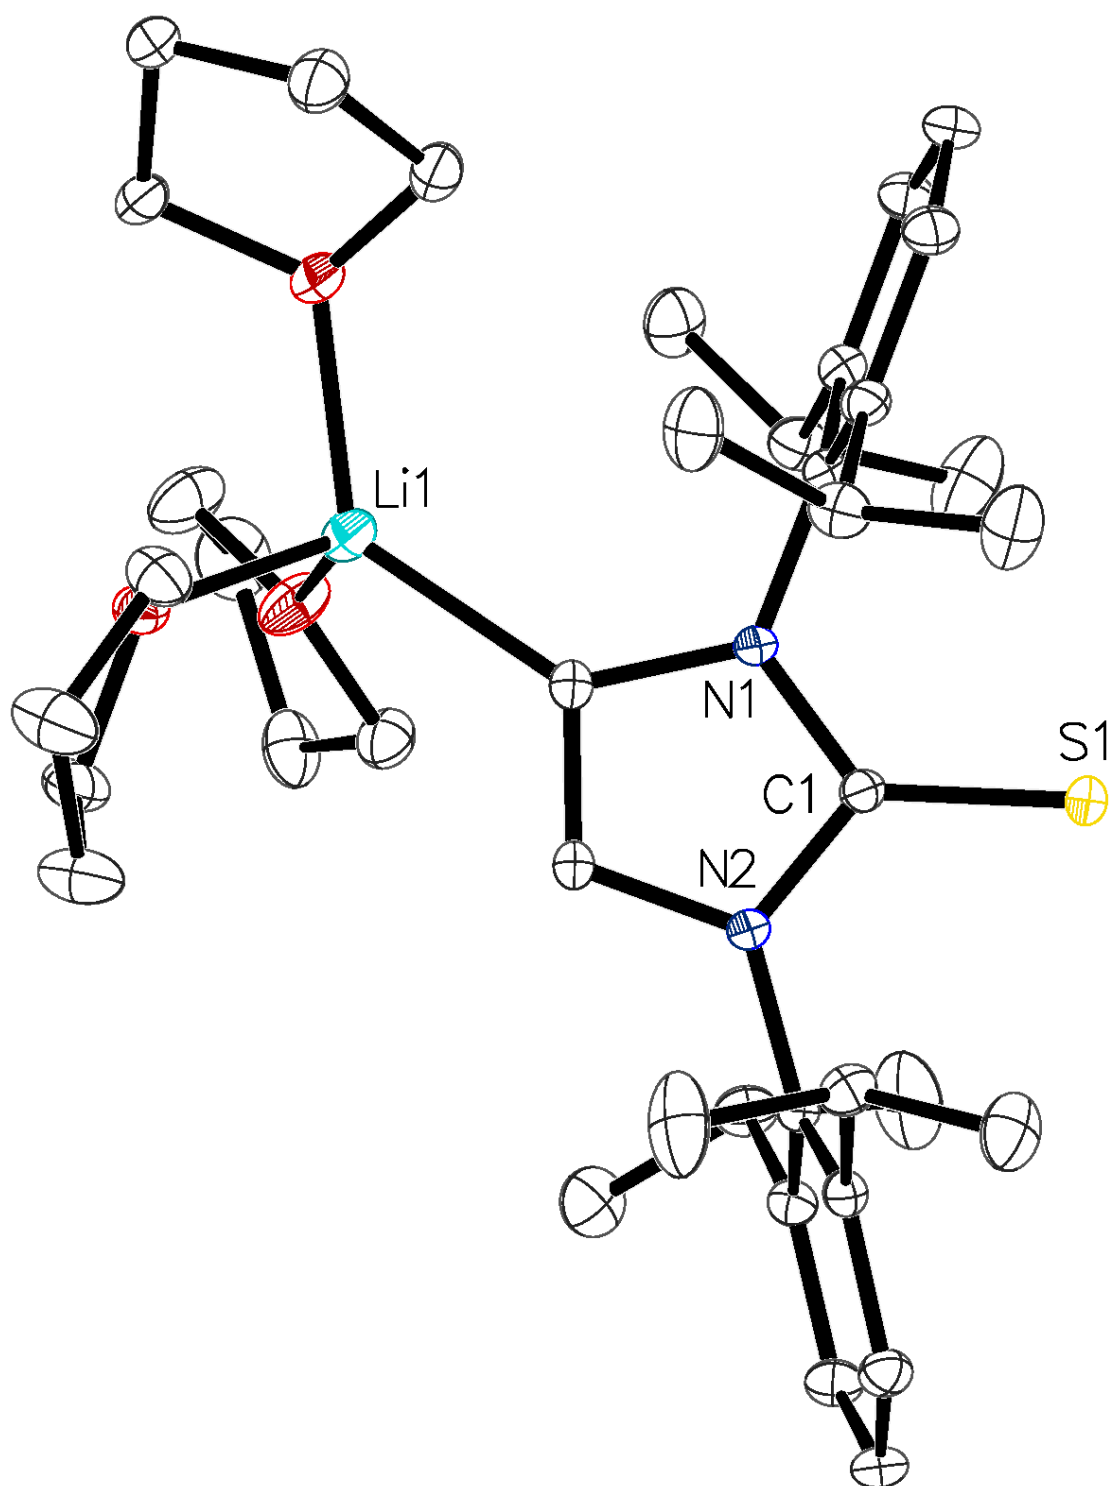

**Figure S1.** Molecular structure of **4** with thermal displacement parameters drawn at 50% probability; hydrogen atoms are omitted for clarity.

**S1.2 [(WCA-IDipp)O]Li(THF)<sub>3</sub> (6·3THF)****Table S 2.** Crystallographic data for compound 6·3THF.

|                                     |                                                                                                                                                              |                            |
|-------------------------------------|--------------------------------------------------------------------------------------------------------------------------------------------------------------|----------------------------|
| Compound                            | 6·3THF                                                                                                                                                       |                            |
| Identification code                 | 2013321                                                                                                                                                      |                            |
| Empirical formula                   | C <sub>57</sub> H <sub>59</sub> BF <sub>15</sub> LiN <sub>2</sub> O <sub>4</sub>                                                                             |                            |
| Formula weight                      | 1138.81                                                                                                                                                      |                            |
| Temperature                         | 100(2) K                                                                                                                                                     |                            |
| Wavelength                          | 1.54184 Å                                                                                                                                                    |                            |
| Instrument (scan mode)              | XtaLAB Synergy, Single source at home/near, HyPix ( $\omega$ scan)                                                                                           |                            |
| Crystal system                      | Monoclinic                                                                                                                                                   |                            |
| Space group                         | <i>P2<sub>1</sub>/n</i>                                                                                                                                      |                            |
| Unit cell dimensions                | a = 10.6547(2) Å                                                                                                                                             | $\alpha = 90^\circ$        |
|                                     | b = 36.0847(4) Å                                                                                                                                             | $\beta = 109.136(2)^\circ$ |
|                                     | c = 14.6984(2) Å                                                                                                                                             | $\gamma = 90^\circ$        |
| Volume                              | 5338.85(15) Å <sup>3</sup>                                                                                                                                   |                            |
| Z                                   | 4                                                                                                                                                            |                            |
| Density (calculated)                | 1.417 Mg/m <sup>3</sup>                                                                                                                                      |                            |
| Absorption coefficient              | 1.067 mm <sup>-1</sup>                                                                                                                                       |                            |
| F(000)                              | 2360                                                                                                                                                         |                            |
| Crystal habitus                     | plate (colorless)                                                                                                                                            |                            |
| Crystal size                        | 0.286 x 0.225 x 0.126 mm <sup>3</sup>                                                                                                                        |                            |
| Theta range for data collection     | 2.449 to 77.764°                                                                                                                                             |                            |
| Index ranges                        | -13 ≤ h ≤ 13, -45 ≤ k ≤ 45, -16 ≤ l ≤ 18                                                                                                                     |                            |
| Reflections collected               | 112445                                                                                                                                                       |                            |
| Independent reflections             | 11276 [R(int) = 0.0463]                                                                                                                                      |                            |
| Completeness to theta = 67.684°     | 100.0 %                                                                                                                                                      |                            |
| Absorption correction               | Semi-empirical from equivalents                                                                                                                              |                            |
| Max. and min. transmission          | 1.00000 and 0.56647                                                                                                                                          |                            |
| Refinement method                   | Full-matrix least-squares on F <sup>2</sup>                                                                                                                  |                            |
| Data / restraints / parameters      | 11276 / 0 / 760                                                                                                                                              |                            |
| Goodness-of-fit on F <sup>2</sup>   | 1.048                                                                                                                                                        |                            |
| Final R indices [I > 2σ(I)]         | R1 = 0.0438, wR2 = 0.1159                                                                                                                                    |                            |
| R indices (all data)                | R1 = 0.0464, wR2 = 0.1177                                                                                                                                    |                            |
| Largest diff. peak and hole         | 0.478 and -0.446 e.Å <sup>-3</sup>                                                                                                                           |                            |
| Crystallisation Details:            | A saturated solution of WCA-IDipp-OLi(thf) <sub>3</sub> in THF was layered with hexane at ambient temperature.                                               |                            |
| Solution                            | SHELXT-2014/5 (Sheldrick 2015)                                                                                                                               |                            |
| Refinement                          | SHELXL-2018/3 (Sheldrick 2018)                                                                                                                               |                            |
| Interface                           | OLEX2 v1.2                                                                                                                                                   |                            |
| Measurement and Refinement Details: | Two methyl groups in an isopropyl moiety and one carbon atom in the molecule are disordered and were refined over two positions. No restraints were applied. |                            |

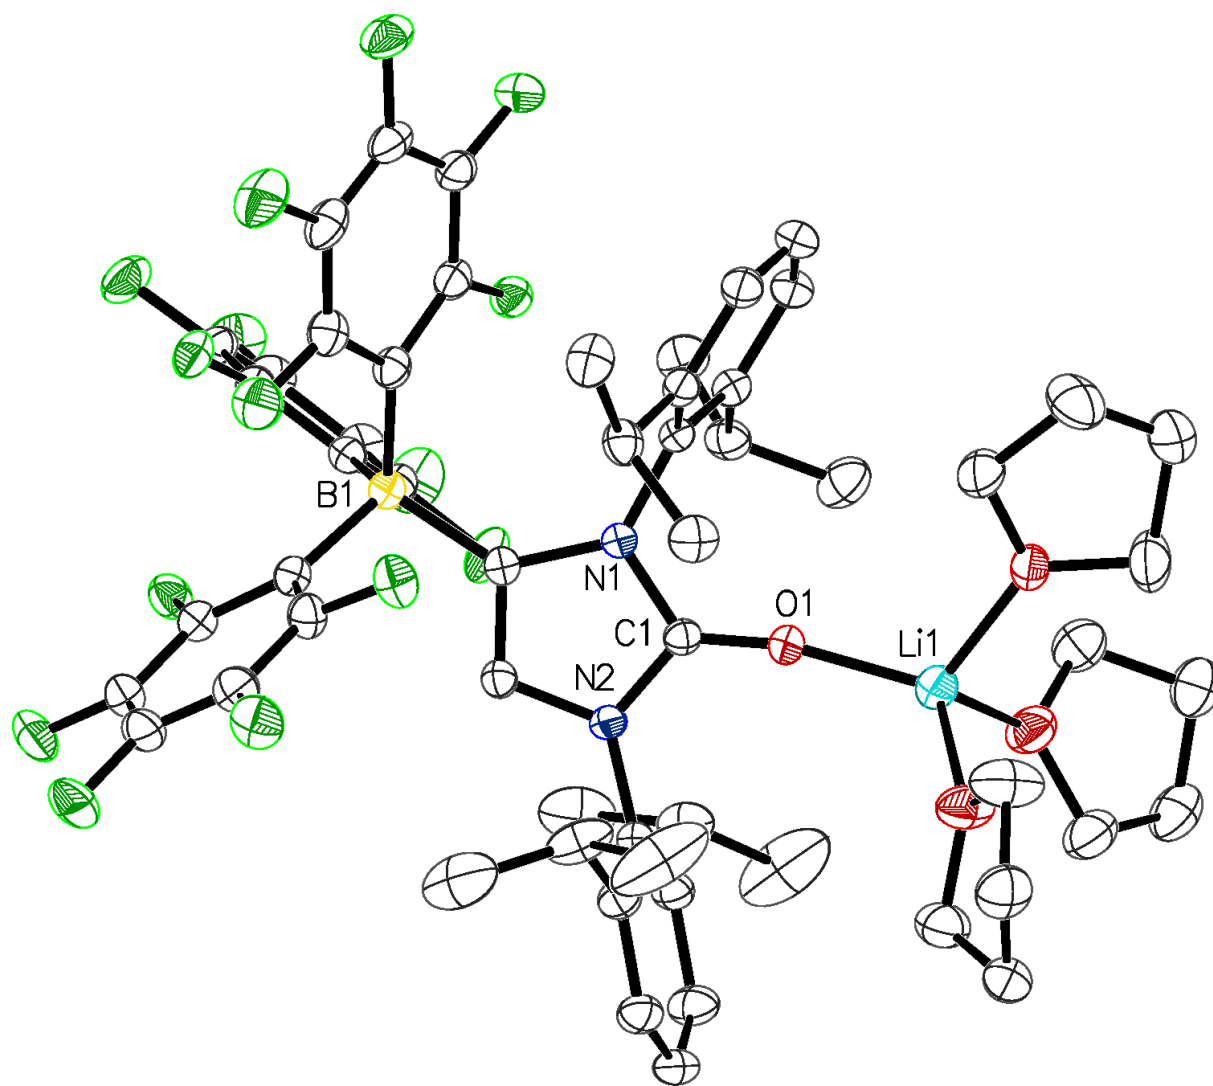

**Figure S2.** Molecular structure of 6·3THF with thermal displacement parameters drawn at 50% probability; hydrogen atoms, the second position of a disordered THF molecule and the second position of a disordered isopropyl group are omitted for clarity.

**S1.3 [(WCA-IDipp)S]Li(THF)<sub>3</sub> (7·5THF)****Table S 3.** Crystallographic data for compound 7·5THF.

|                                     |                                                                                            |                              |
|-------------------------------------|--------------------------------------------------------------------------------------------|------------------------------|
| Compound                            | 7·5THF                                                                                     |                              |
| Identification code                 | 2013322                                                                                    |                              |
| Empirical formula                   | C <sub>65</sub> H <sub>75</sub> BF <sub>15</sub> LiN <sub>2</sub> O <sub>5</sub> S         |                              |
| Formula weight                      | 1299.08                                                                                    |                              |
| Temperature                         | 101(2) K                                                                                   |                              |
| Wavelength                          | 1.54184 Å                                                                                  |                              |
| Instrument (scan mode)              | Xcalibur, Atlas, Nova ( $\omega$ scan)                                                     |                              |
| Crystal system                      | Monoclinic                                                                                 |                              |
| Space group                         | <i>P2<sub>1</sub>/c</i>                                                                    |                              |
| Unit cell dimensions                | a = 10.71830(10) Å                                                                         | $\alpha = 90^\circ$          |
|                                     | b = 26.7113(2) Å                                                                           | $\beta = 119.9080(10)^\circ$ |
|                                     | c = 25.5331(3) Å                                                                           | $\gamma = 90^\circ$          |
| Volume                              | 6336.61(12) Å <sup>3</sup>                                                                 |                              |
| Z                                   | 4                                                                                          |                              |
| Density (calculated)                | 1.362 Mg/m <sup>3</sup>                                                                    |                              |
| Absorption coefficient              | 1.278 mm <sup>-1</sup>                                                                     |                              |
| F(000)                              | 2712                                                                                       |                              |
| Crystal habitus                     | irregular (colourless)                                                                     |                              |
| Crystal size                        | 0.301 x 0.172 x 0.145 mm <sup>3</sup>                                                      |                              |
| Theta range for data collection     | 3.309 to 76.232°                                                                           |                              |
| Index ranges                        | -13 ≤ h ≤ 12, -33 ≤ k ≤ 33, -32 ≤ l ≤ 32                                                   |                              |
| Reflections collected               | 129565                                                                                     |                              |
| Independent reflections             | 13234 [R(int) = 0.0509]                                                                    |                              |
| Completeness to theta = 67.684°     | 100.0 %                                                                                    |                              |
| Absorption correction               | Gaussian                                                                                   |                              |
| Max. and min. transmission          | 0.977 and 0.959                                                                            |                              |
| Refinement method                   | Full-matrix least-squares on F <sup>2</sup>                                                |                              |
| Data / restraints / parameters      | 13234 / 790 / 941                                                                          |                              |
| Goodness-of-fit on F <sup>2</sup>   | 1.020                                                                                      |                              |
| Final R indices [I > 2σ(I)]         | R1 = 0.0497, wR2 = 0.1297                                                                  |                              |
| R indices (all data)                | R1 = 0.0592, wR2 = 0.1381                                                                  |                              |
| Largest diff. peak and hole         | 1.031 and -0.809 e.Å <sup>-3</sup>                                                         |                              |
| Crystallisation Details:            | A saturated THF solution of WCA-IDipp-SLi was layered with hexane at ambient temperatures. |                              |
| Solution                            | SHELXT-2014/5 (Sheldrick 2015)                                                             |                              |
| Refinement                          | SHELXL-2018/3 (Sheldrick 2018)                                                             |                              |
| Interface                           | OLEX2 v1.2                                                                                 |                              |
| Measurement and Refinement Details: | All THF molecules are disordered and were refined over two positions.                      |                              |

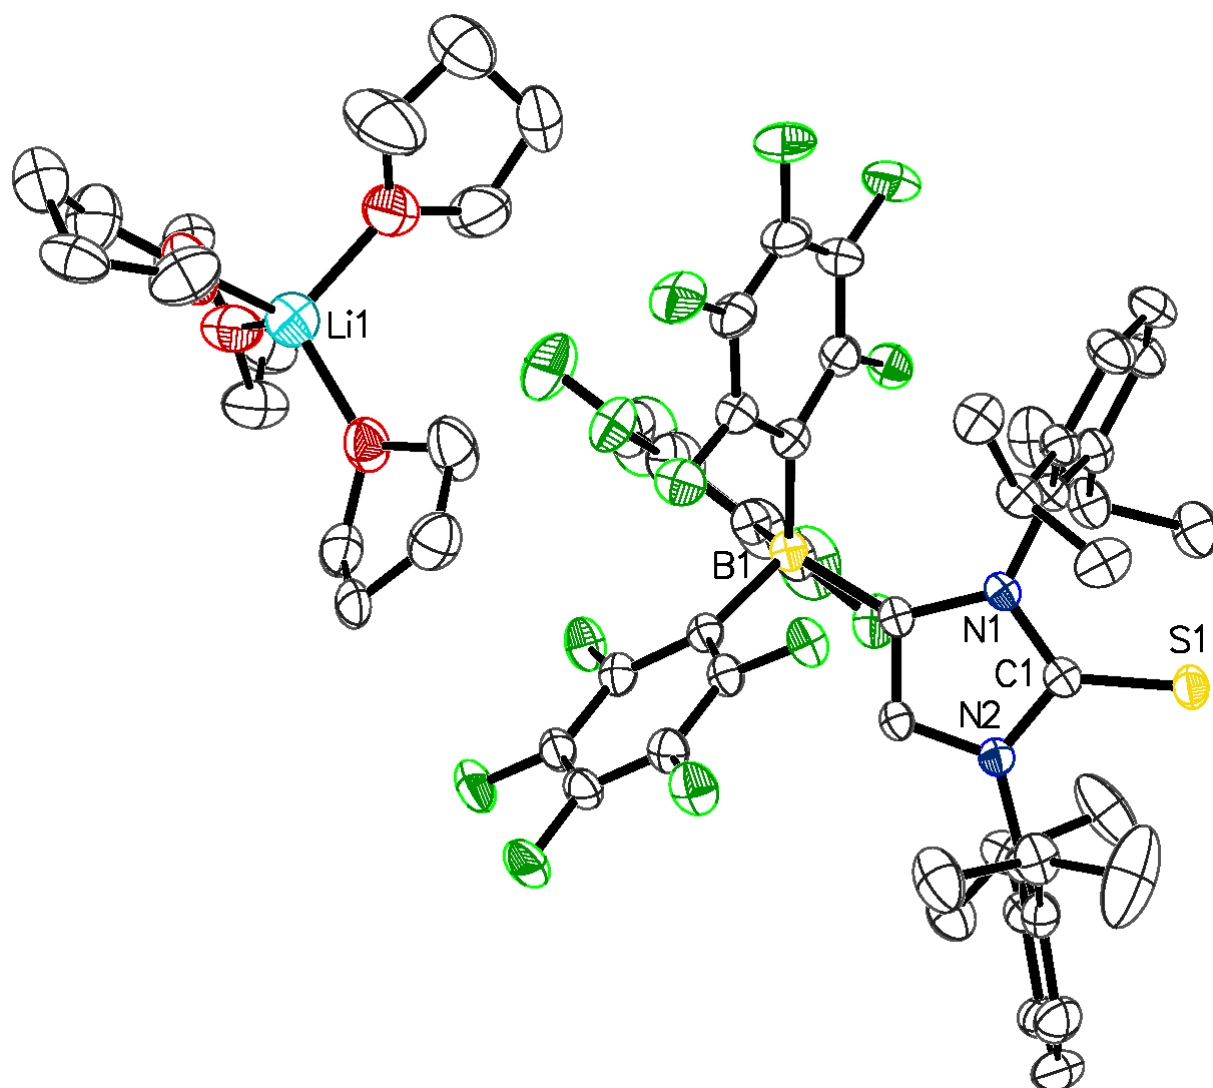

**Figure S3.** Molecular structure of 7·5THF with thermal displacement parameters drawn at 50% probability; hydrogen atoms, second positions of the disordered THF molecules and one co-crystallized THF molecule are omitted for clarity.



**S1.4 [(WCA-IDipp)Se]Li(OEt<sub>2</sub>)<sub>3</sub> (8·3Et<sub>2</sub>O)****Table S 4.** Crystallographic data for compound 8·3Et<sub>2</sub>O.

|                                     |                                                                                                                                                                                                                 |                        |
|-------------------------------------|-----------------------------------------------------------------------------------------------------------------------------------------------------------------------------------------------------------------|------------------------|
| Compound                            | 8·3Et <sub>2</sub> O                                                                                                                                                                                            |                        |
| Identification code                 | 2013323                                                                                                                                                                                                         |                        |
| Empirical formula                   | C <sub>57</sub> H <sub>65</sub> BF <sub>15</sub> LiN <sub>2</sub> O <sub>3</sub> Se                                                                                                                             |                        |
| Formula weight                      | 1207.82                                                                                                                                                                                                         |                        |
| Temperature                         | 100(2) K                                                                                                                                                                                                        |                        |
| Wavelength                          | 0.7107 Å                                                                                                                                                                                                        |                        |
| Instrument (scan mode)              | Xcalibur, Eos ( $\omega$ scan)                                                                                                                                                                                  |                        |
| Crystal system                      | Triclinic                                                                                                                                                                                                       |                        |
| Space group                         | P-1                                                                                                                                                                                                             |                        |
| Unit cell dimensions                | a = 12.6670(4) Å                                                                                                                                                                                                | $\alpha$ = 94.150(2)°  |
|                                     | b = 14.6160(4) Å                                                                                                                                                                                                | $\beta$ = 90.650(2)°   |
|                                     | c = 16.7800(4) Å                                                                                                                                                                                                | $\gamma$ = 113.000(2)° |
| Volume                              | 2849.54(14) Å <sup>3</sup>                                                                                                                                                                                      |                        |
| Z                                   | 2                                                                                                                                                                                                               |                        |
| Density (calculated)                | 1.408 Mg/m <sup>3</sup>                                                                                                                                                                                         |                        |
| Absorption coefficient              | 0.753 mm <sup>-1</sup>                                                                                                                                                                                          |                        |
| F(000)                              | 1244                                                                                                                                                                                                            |                        |
| Crystal habitus                     | irregular (colourless)                                                                                                                                                                                          |                        |
| Crystal size                        | 0.529 x 0.372 x 0.301 mm <sup>3</sup>                                                                                                                                                                           |                        |
| Theta range for data collection     | 2.153 to 31.088°                                                                                                                                                                                                |                        |
| Index ranges                        | -18 ≤ h ≤ 18, -20 ≤ k ≤ 20, -24 ≤ l ≤ 24                                                                                                                                                                        |                        |
| Reflections collected               | 253747                                                                                                                                                                                                          |                        |
| Independent reflections             | 16941 [R(int) = 0.0445]                                                                                                                                                                                         |                        |
| Completeness to theta = 25.241°     | 99.9 %                                                                                                                                                                                                          |                        |
| Absorption correction               | Analytical                                                                                                                                                                                                      |                        |
| Max. and min. transmission          | 0.959 and 0.936                                                                                                                                                                                                 |                        |
| Refinement method                   | Full-matrix least-squares on F <sup>2</sup>                                                                                                                                                                     |                        |
| Data / restraints / parameters      | 16941 / 90 / 802                                                                                                                                                                                                |                        |
| Goodness-of-fit on F <sup>2</sup>   | 1.034                                                                                                                                                                                                           |                        |
| Final R indices [I > 2σ(I)]         | R1 = 0.0623, wR2 = 0.1540                                                                                                                                                                                       |                        |
| R indices (all data)                | R1 = 0.0808, wR2 = 0.1671                                                                                                                                                                                       |                        |
| Largest diff. peak and hole         | 1.354 and -0.872 e.Å <sup>-3</sup>                                                                                                                                                                              |                        |
| Crystallisation Details:            | A saturated solution of WCA-IDipp-SeLi in Et <sub>2</sub> O was layered with hexane at ambient temperatures.                                                                                                    |                        |
| Solution                            | SHELXT-2014/5 (Sheldrick 2015)                                                                                                                                                                                  |                        |
| Refinement                          | SHELXL-2018/3 (Sheldrick 2018)                                                                                                                                                                                  |                        |
| Interface                           | OLEX2 v1.2                                                                                                                                                                                                      |                        |
| Measurement and Refinement Details: | The three Et <sub>2</sub> O molecules which coordinate to the Li cation are disordered and were refined over two positions. The major component was refined anisotropically, the minor component isotropically. |                        |

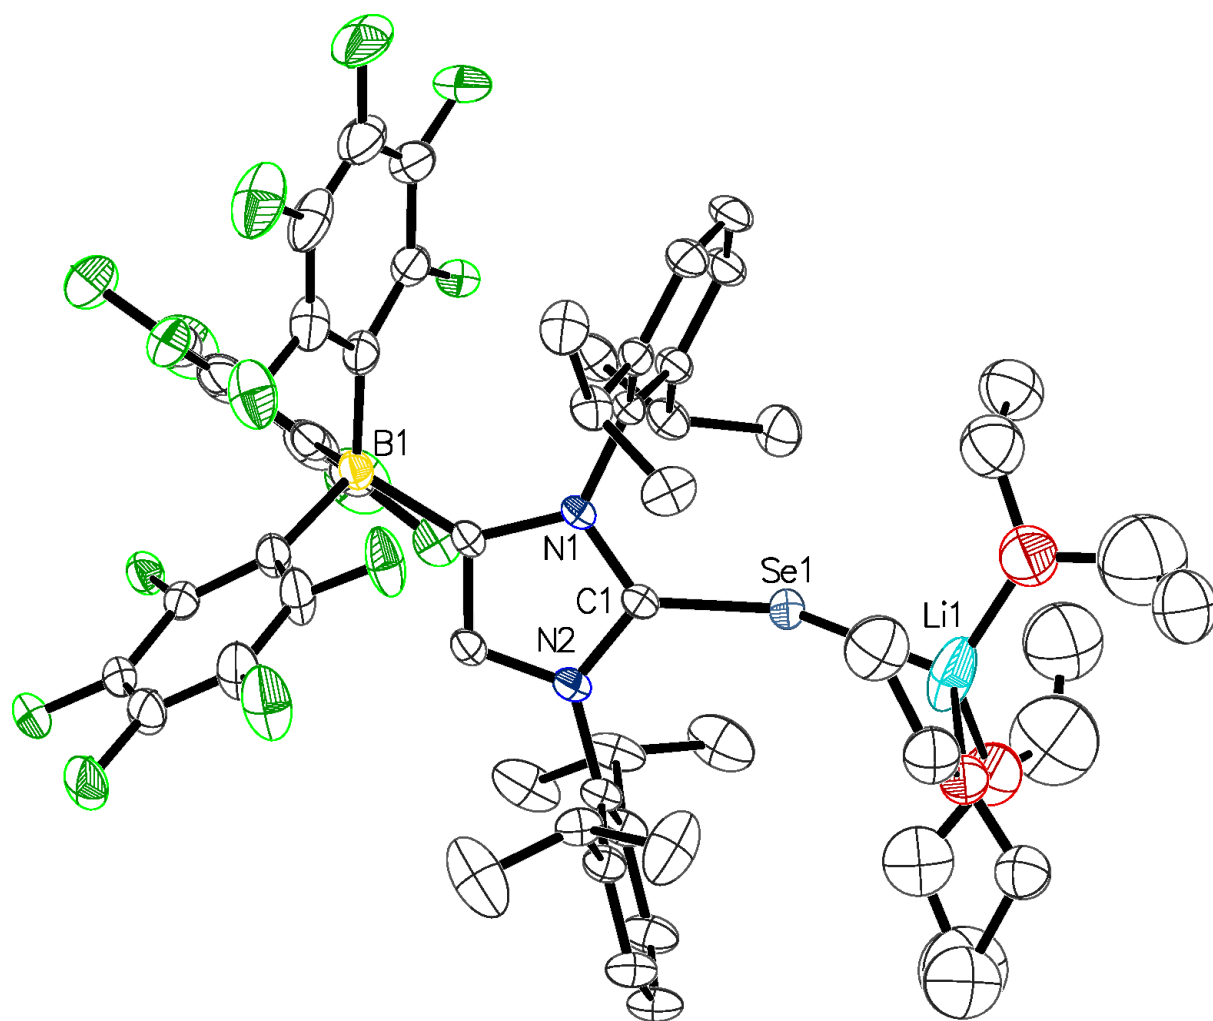

**Figure S4.** Molecular structure of  $8 \cdot 3\text{Et}_2\text{O}$  with thermal displacement parameters drawn at 50% probability; hydrogen atoms and the second positions of the disordered  $\text{Et}_2\text{O}$  molecules are omitted for clarity.

**S1.5 [(WCA-IDipp)Te]Li(OEt<sub>2</sub>)<sub>3</sub> (9·2Et<sub>2</sub>O·2THF).****Table S 5.** Crystallographic data for compound 9·2Et<sub>2</sub>O·2THF.

|                                     |                                                                                                                                                                                         |                             |
|-------------------------------------|-----------------------------------------------------------------------------------------------------------------------------------------------------------------------------------------|-----------------------------|
| Compound                            | 9·2Et <sub>2</sub> O·2THF                                                                                                                                                               |                             |
| Identification code                 | 2013324                                                                                                                                                                                 |                             |
| Empirical formula                   | C <sub>61</sub> H <sub>71</sub> BF <sub>15</sub> LiN <sub>2</sub> O <sub>4</sub> Te                                                                                                     |                             |
| Formula weight                      | 1326.54                                                                                                                                                                                 |                             |
| Temperature                         | 100(2) K                                                                                                                                                                                |                             |
| Wavelength                          | 1.5418 Å                                                                                                                                                                                |                             |
| Instrument (scan mode)              | Xcalibur, Atlas, Nova ( $\omega$ scan)                                                                                                                                                  |                             |
| Crystal system                      | Triclinic                                                                                                                                                                               |                             |
| Space group                         | P-1                                                                                                                                                                                     |                             |
| Unit cell dimensions                | a = 13.1800(4) Å                                                                                                                                                                        | $\alpha = 100.740(2)^\circ$ |
|                                     | b = 14.5110(4) Å                                                                                                                                                                        | $\beta = 103.210(2)^\circ$  |
|                                     | c = 16.9900(4) Å                                                                                                                                                                        | $\gamma = 92.730(2)^\circ$  |
| Volume                              | 3094.17(15) Å <sup>3</sup>                                                                                                                                                              |                             |
| Z                                   | 2                                                                                                                                                                                       |                             |
| Density (calculated)                | 1.424 Mg/m <sup>3</sup>                                                                                                                                                                 |                             |
| Absorption coefficient              | 4.596 mm <sup>-1</sup>                                                                                                                                                                  |                             |
| F(000)                              | 1356                                                                                                                                                                                    |                             |
| Crystal habitus                     | irregular (yellow)                                                                                                                                                                      |                             |
| Crystal size                        | 0.406 x 0.161 x 0.125 mm <sup>3</sup>                                                                                                                                                   |                             |
| Theta range for data collection     | 3.460 to 76.539°                                                                                                                                                                        |                             |
| Index ranges                        | -16 ≤ h ≤ 16, -18 ≤ k ≤ 18, -21 ≤ l ≤ 21                                                                                                                                                |                             |
| Reflections collected               | 114871                                                                                                                                                                                  |                             |
| Independent reflections             | 12929 [R(int) = 0.0570]                                                                                                                                                                 |                             |
| Completeness to theta = 67.680°     | 100.0 %                                                                                                                                                                                 |                             |
| Absorption correction               | Gaussian                                                                                                                                                                                |                             |
| Max. and min. transmission          | 1.000 and 0.468                                                                                                                                                                         |                             |
| Refinement method                   | Full-matrix least-squares on F <sup>2</sup>                                                                                                                                             |                             |
| Data / restraints / parameters      | 12929 / 120 / 779                                                                                                                                                                       |                             |
| Goodness-of-fit on F <sup>2</sup>   | 1.049                                                                                                                                                                                   |                             |
| Final R indices [I > 2σ(I)]         | R1 = 0.0431, wR2 = 0.1179                                                                                                                                                               |                             |
| R indices (all data)                | R1 = 0.0436, wR2 = 0.1184                                                                                                                                                               |                             |
| Largest diff. peak and hole         | 1.695 and -0.990 e.Å <sup>-3</sup>                                                                                                                                                      |                             |
| Crystallisation Details:            | A saturated solution of [WCA-IDipp=Te][Li(THF) <sub>n</sub> ] in Et <sub>2</sub> O was layered with hexane at ambient temperatures in the dark. The compound is highly light-sensitive. |                             |
| Solution                            | SHELXT-2014/5 (Sheldrick 2015)                                                                                                                                                          |                             |
| Refinement                          | SHELXL-2018/3 (Sheldrick 2018)                                                                                                                                                          |                             |
| Interface                           | OLEX2 v1.2                                                                                                                                                                              |                             |
| Measurement and Refinement Details: | Atoms in the Li coordinating THF and Et <sub>2</sub> O molecules were restrained with ISOR 0.005 due to misshapen thermal ellipsoids.                                                   |                             |

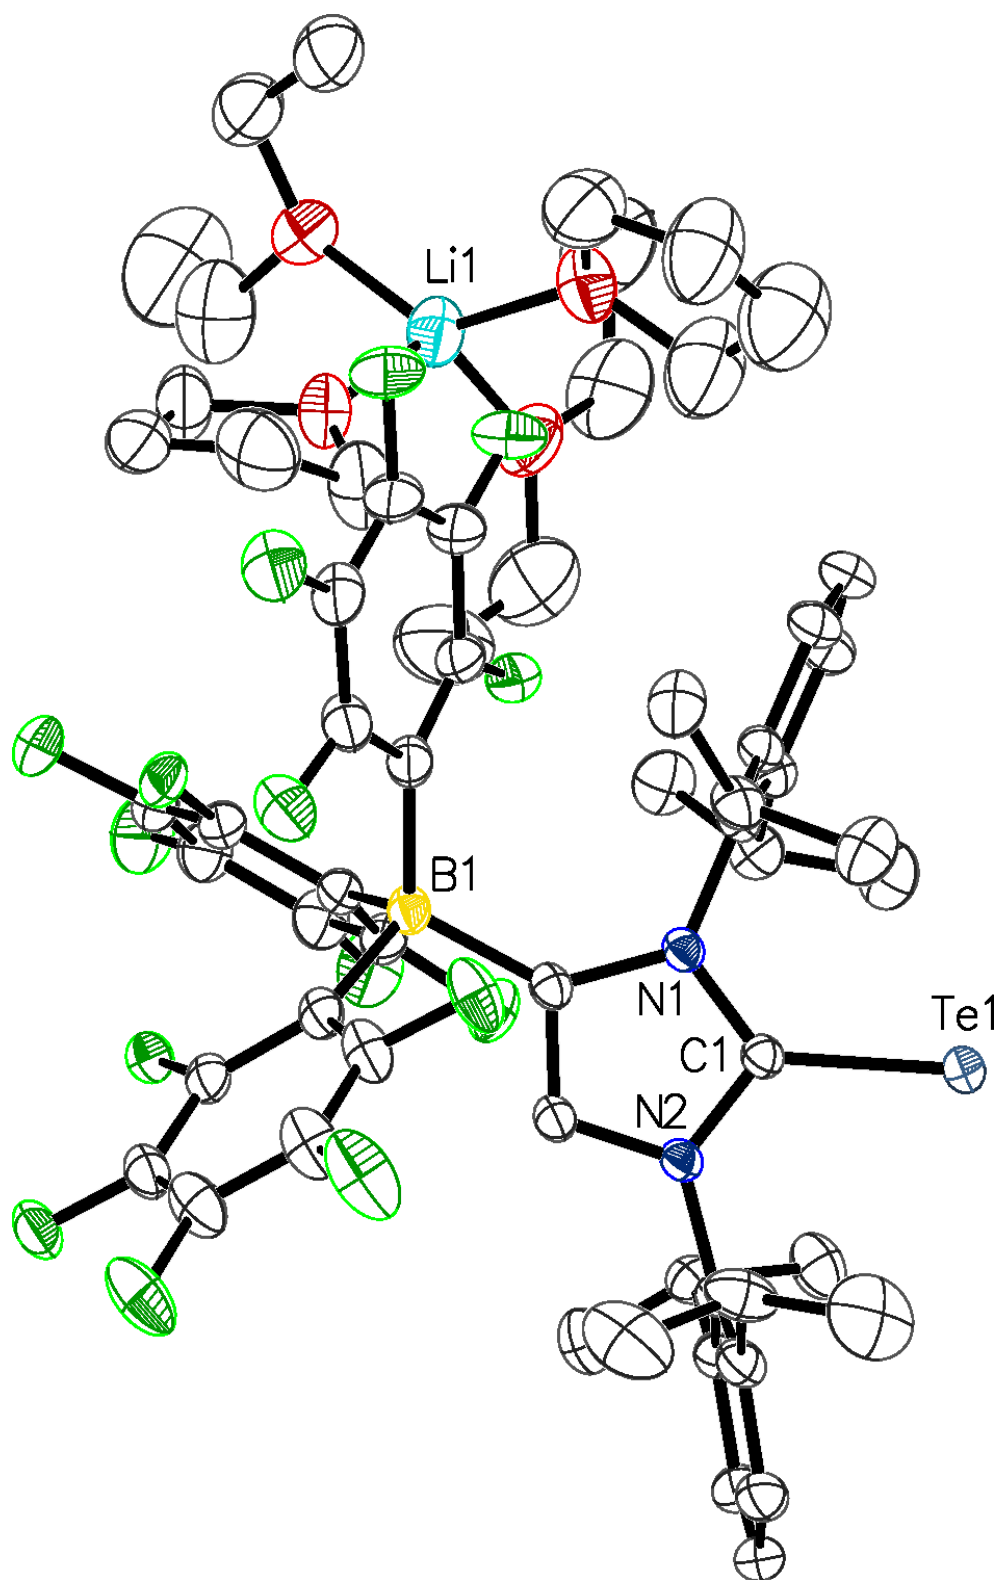

**Figure S5.** Molecular structure of 9·2Et<sub>2</sub>O·2THF with thermal displacement parameters drawn at 50% probability; hydrogen atoms are omitted for clarity.

**S1.6 (WCA-IDipp)OH (10·toluene)****Table S 6.** Crystallographic data for compound **10**-toluene.

|                                     |                                                                                                                                                                                                                                                  |                       |
|-------------------------------------|--------------------------------------------------------------------------------------------------------------------------------------------------------------------------------------------------------------------------------------------------|-----------------------|
| Compound                            | <b>10</b> -toluene                                                                                                                                                                                                                               |                       |
| Identification code                 | 2013325                                                                                                                                                                                                                                          |                       |
| Empirical formula                   | C <sub>52</sub> H <sub>44</sub> BF <sub>15</sub> N <sub>2</sub> O                                                                                                                                                                                |                       |
| Formula weight                      | 1008.70                                                                                                                                                                                                                                          |                       |
| Temperature                         | 100(2) K                                                                                                                                                                                                                                         |                       |
| Wavelength                          | 0.71073 Å                                                                                                                                                                                                                                        |                       |
| Instrument (scan mode)              | XtaLAB Synergy, Single source at offset/far, HyPix ( $\omega$ scan)                                                                                                                                                                              |                       |
| Crystal system                      | Triclinic                                                                                                                                                                                                                                        |                       |
| Space group                         | P-1                                                                                                                                                                                                                                              |                       |
| Unit cell dimensions                | a = 10.2374(2) Å                                                                                                                                                                                                                                 | $\alpha$ = 88.932(2)° |
|                                     | b = 11.4752(2) Å                                                                                                                                                                                                                                 | $\beta$ = 85.317(2)°  |
|                                     | c = 20.0948(4) Å                                                                                                                                                                                                                                 | $\gamma$ = 81.974(2)° |
| Volume                              | 2329.67(8) Å <sup>3</sup>                                                                                                                                                                                                                        |                       |
| Z                                   | 2                                                                                                                                                                                                                                                |                       |
| Density (calculated)                | 1.438 Mg/m <sup>3</sup>                                                                                                                                                                                                                          |                       |
| Absorption coefficient              | 0.127 mm <sup>-1</sup>                                                                                                                                                                                                                           |                       |
| F(000)                              | 1036                                                                                                                                                                                                                                             |                       |
| Crystal habitus                     | irregular (colourless)                                                                                                                                                                                                                           |                       |
| Crystal size                        | 0.466 x 0.303 x 0.262 mm <sup>3</sup>                                                                                                                                                                                                            |                       |
| Theta range for data collection     | 2.637 to 30.508°                                                                                                                                                                                                                                 |                       |
| Index ranges                        | -14 ≤ h ≤ 14, -16 ≤ k ≤ 16, -28 ≤ l ≤ 28                                                                                                                                                                                                         |                       |
| Reflections collected               | 210091                                                                                                                                                                                                                                           |                       |
| Independent reflections             | 14218 [R(int) = 0.0562]                                                                                                                                                                                                                          |                       |
| Completeness to theta = 25.242°     | 99.8 %                                                                                                                                                                                                                                           |                       |
| Absorption correction               | Gaussian                                                                                                                                                                                                                                         |                       |
| Max. and min. transmission          | 1.000 and 0.263                                                                                                                                                                                                                                  |                       |
| Refinement method                   | Full-matrix least-squares on F <sup>2</sup>                                                                                                                                                                                                      |                       |
| Data / restraints / parameters      | 14218 / 0 / 715                                                                                                                                                                                                                                  |                       |
| Goodness-of-fit on F <sup>2</sup>   | 1.025                                                                                                                                                                                                                                            |                       |
| Final R indices [I > 2σ(I)]         | R1 = 0.0467, wR2 = 0.1268                                                                                                                                                                                                                        |                       |
| R indices (all data)                | R1 = 0.0518, wR2 = 0.1308                                                                                                                                                                                                                        |                       |
| Largest diff. peak and hole         | 1.357 and -0.499 e.Å <sup>-3</sup>                                                                                                                                                                                                               |                       |
| Crystallisation Details:            | A saturated solution of WCA-IDipp-OH in toluene was layered with nhexane at ambient temperatures under inert conditions.                                                                                                                         |                       |
| Solution                            | SHELXT-2014/5 (Sheldrick 2015)                                                                                                                                                                                                                   |                       |
| Refinement                          | SHELXL-2018/3 (Sheldrick 2018)                                                                                                                                                                                                                   |                       |
| Interface                           | OLEX2 v1.2                                                                                                                                                                                                                                       |                       |
| Measurement and Refinement Details: | A toluene molecule is disordered over two positions and was refined as such. The hydrogen atom bound to the oxygen atom was located in the difference electron density map and its position was fixed. The displacement parameters were refined. |                       |

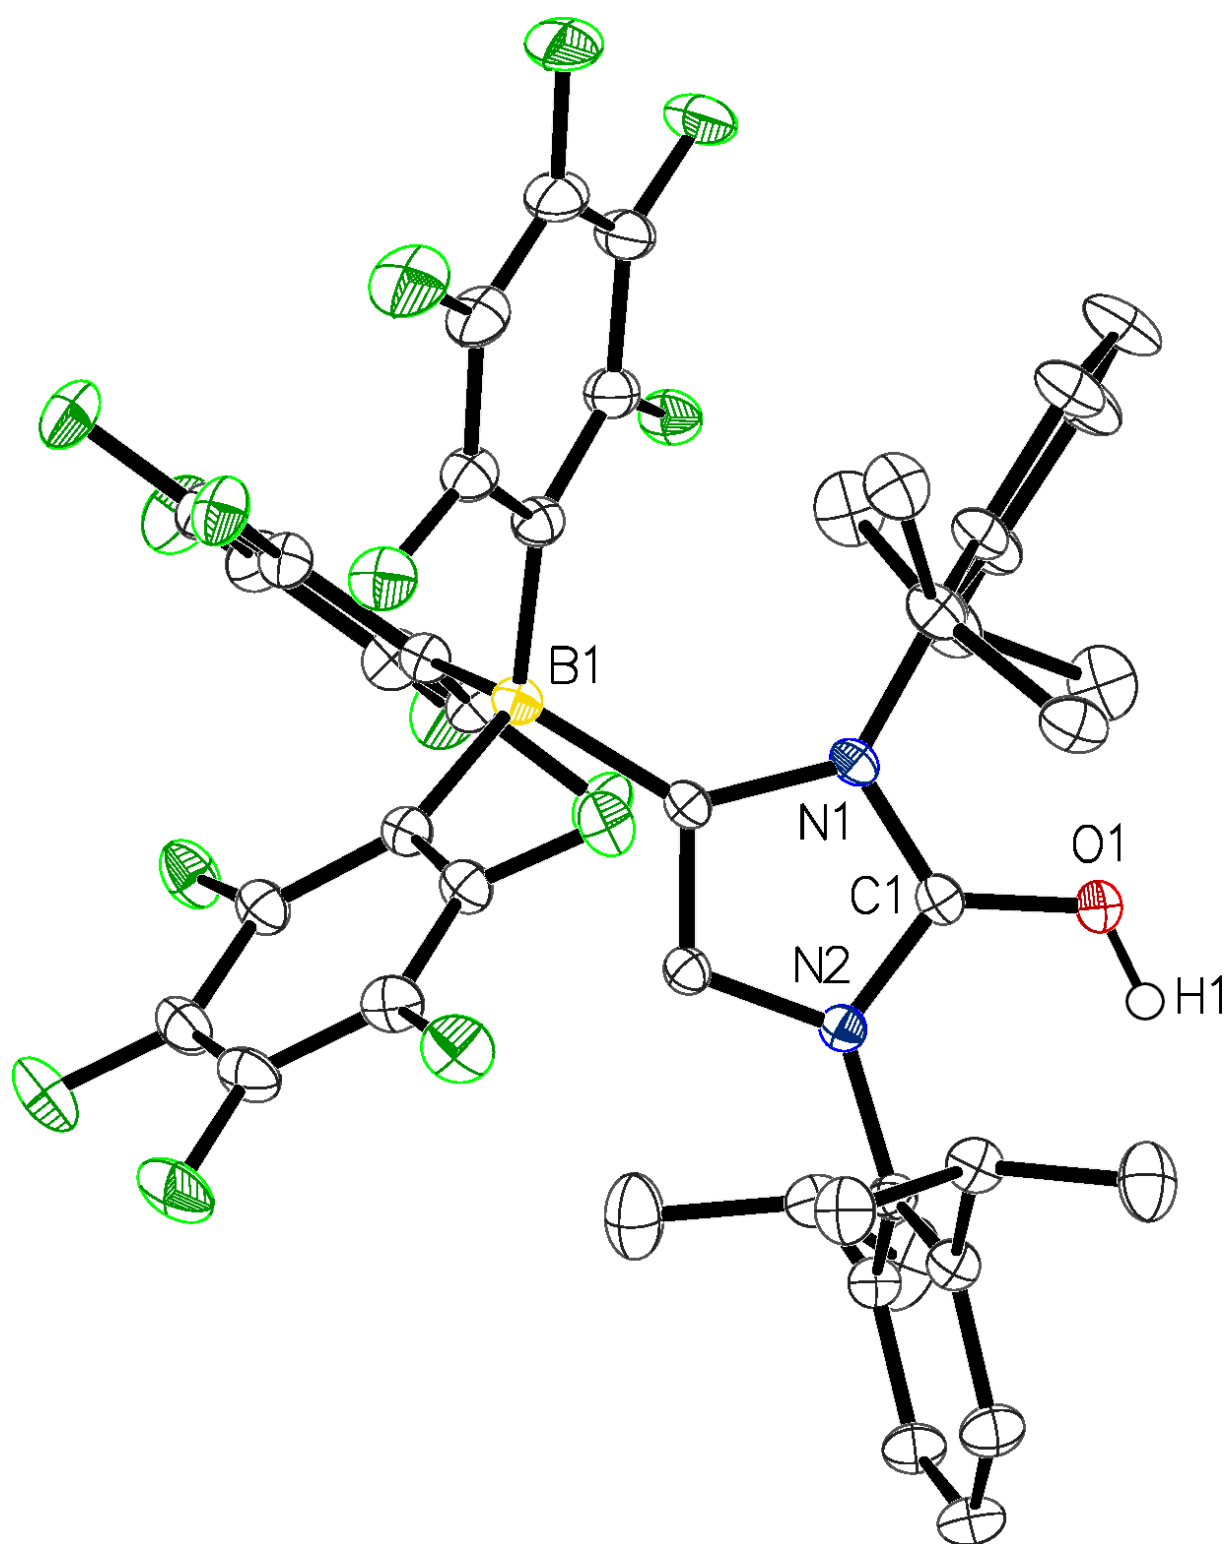

**Figure S6.** Molecular structure of **10**-toluene with thermal displacement parameters drawn at 50% probability; hydrogen atoms (except the oxygen bound) and one disordered toluene molecule are omitted for clarity.

**S1.7 (WCA-IDipp)SH (11)****Table S 7.** Crystallographic data for compound **11**.

|                                     |                                                                                                                                                                             |                            |
|-------------------------------------|-----------------------------------------------------------------------------------------------------------------------------------------------------------------------------|----------------------------|
| Compound                            | <b>11</b>                                                                                                                                                                   |                            |
| Identification code                 | 2013326                                                                                                                                                                     |                            |
| Empirical formula                   | C <sub>45</sub> H <sub>36</sub> BF <sub>15</sub> N <sub>2</sub> S                                                                                                           |                            |
| Formula weight                      | 932.63                                                                                                                                                                      |                            |
| Temperature                         | 100(2) K                                                                                                                                                                    |                            |
| Wavelength                          | 1.54184 Å                                                                                                                                                                   |                            |
| Instrument (scan mode)              | XtaLAB Synergy, Single source at home/near, HyPix ( $\omega$ scan)                                                                                                          |                            |
| Crystal system                      | Triclinic                                                                                                                                                                   |                            |
| Space group                         | P-1                                                                                                                                                                         |                            |
| Unit cell dimensions                | a = 10.5249(6) Å                                                                                                                                                            | $\alpha = 73.171(6)^\circ$ |
|                                     | b = 12.2429(9) Å                                                                                                                                                            | $\beta = 74.186(6)^\circ$  |
|                                     | c = 18.9300(9) Å                                                                                                                                                            | $\gamma = 65.396(8)^\circ$ |
| Volume                              | 2090.2(3) Å <sup>3</sup>                                                                                                                                                    |                            |
| Z                                   | 2                                                                                                                                                                           |                            |
| Density (calculated)                | 1.482 Mg/m <sup>3</sup>                                                                                                                                                     |                            |
| Absorption coefficient              | 1.617 mm <sup>-1</sup>                                                                                                                                                      |                            |
| F(000)                              | 952                                                                                                                                                                         |                            |
| Crystal habitus                     | plate (colourless)                                                                                                                                                          |                            |
| Crystal size                        | 0.170 x 0.078 x 0.027 mm <sup>3</sup>                                                                                                                                       |                            |
| Theta range for data collection     | 2.477 to 77.958°                                                                                                                                                            |                            |
| Index ranges                        | -13 ≤ h ≤ 13, -15 ≤ k ≤ 15, -21 ≤ l ≤ 23                                                                                                                                    |                            |
| Reflections collected               | 29949                                                                                                                                                                       |                            |
| Independent reflections             | 8670 [R(int) = 0.0660]                                                                                                                                                      |                            |
| Completeness to theta = 67.684°     | 99.7 %                                                                                                                                                                      |                            |
| Absorption correction               | Gaussian                                                                                                                                                                    |                            |
| Max. and min. transmission          | 1.000 and 0.719                                                                                                                                                             |                            |
| Refinement method                   | Full-matrix least-squares on F <sup>2</sup>                                                                                                                                 |                            |
| Data / restraints / parameters      | 8670 / 0 / 589                                                                                                                                                              |                            |
| Goodness-of-fit on F <sup>2</sup>   | 1.052                                                                                                                                                                       |                            |
| Final R indices [I > 2σ(I)]         | R1 = 0.0542, wR2 = 0.1376                                                                                                                                                   |                            |
| R indices (all data)                | R1 = 0.0787, wR2 = 0.1517                                                                                                                                                   |                            |
| Largest diff. peak and hole         | 0.473 and -0.422 e.Å <sup>-3</sup>                                                                                                                                          |                            |
| Crystallisation Details:            | Decomposition product of a saturated solution of WCA-IDipp-SLi + FeCl <sub>2</sub> (NCMe) <sub>2</sub> layered with nhexane at ambient temperatures under inert conditions. |                            |
| Solution                            | SHELXT-2014/5 (Sheldrick 2015)                                                                                                                                              |                            |
| Refinement                          | SHELXL-2018/3 (Sheldrick 2018)                                                                                                                                              |                            |
| Interface                           | OLEX2 v1.2                                                                                                                                                                  |                            |
| Measurement and Refinement Details: | Thy hydrogen atom bound to the sulfur atom (H1) was refined freely. No restraints or constraints were applied.                                                              |                            |

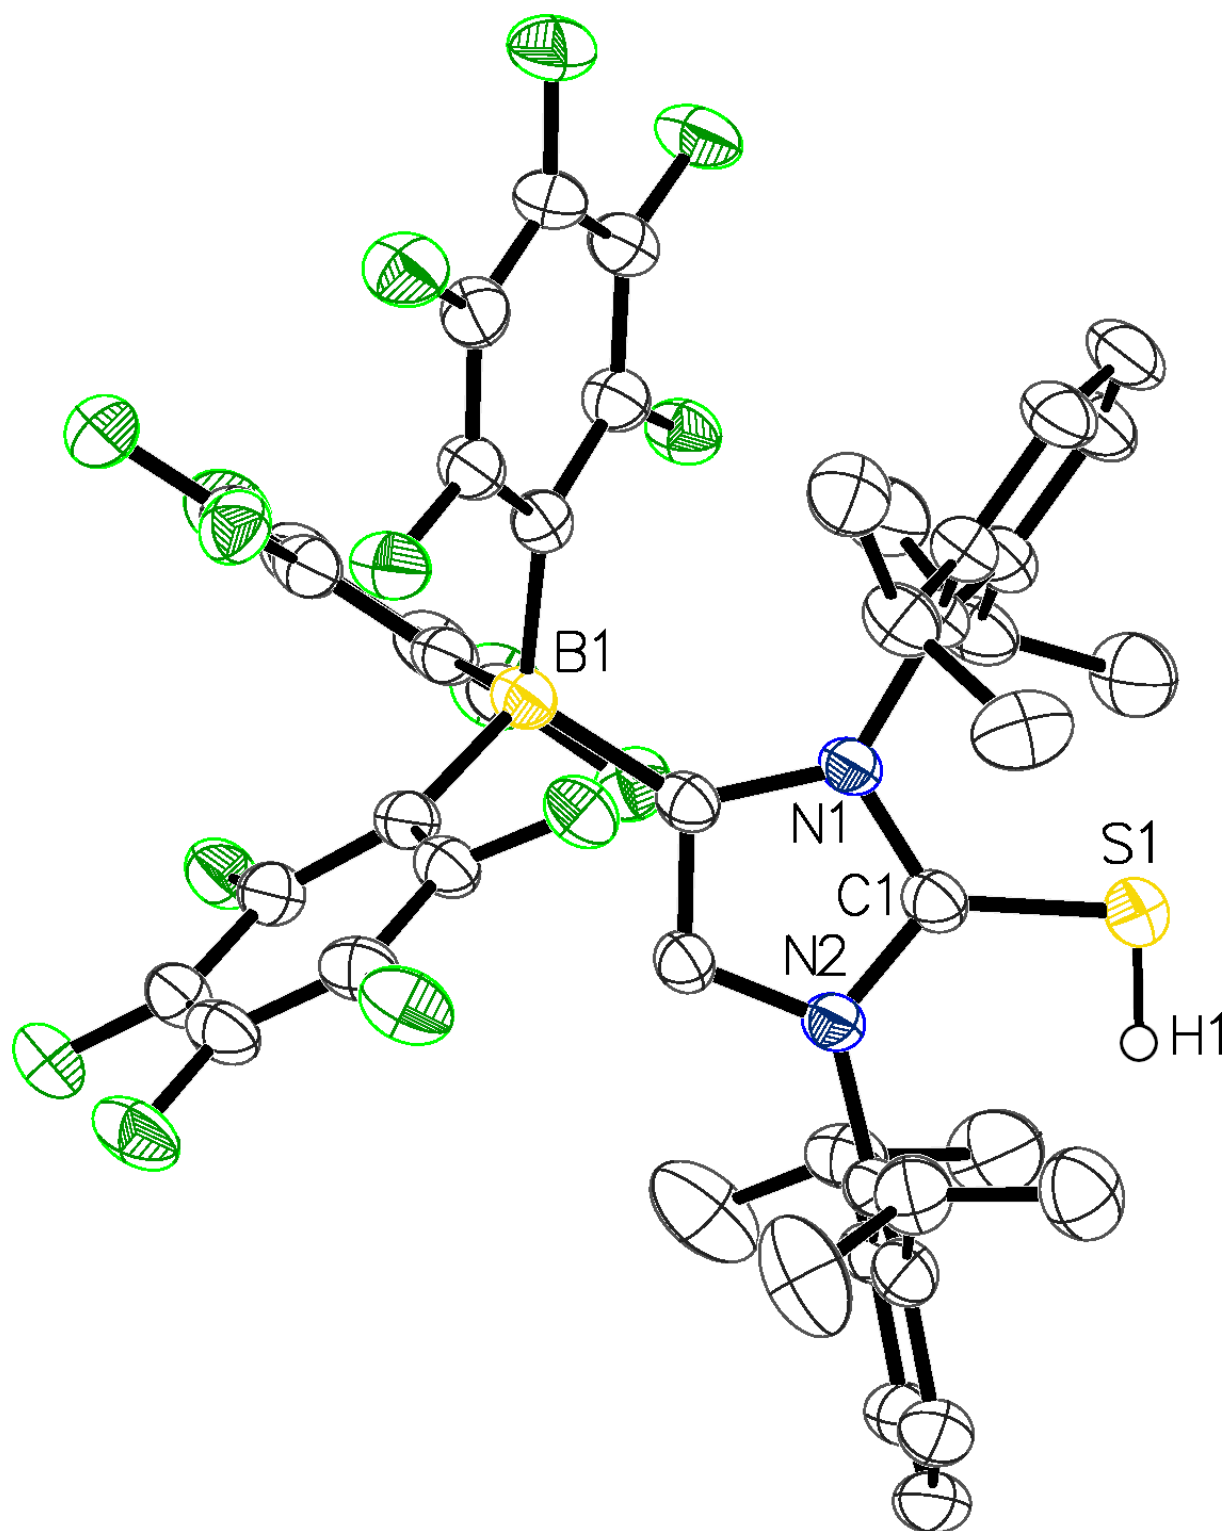

**Figure S 7.** Molecular structure of **11** with thermal displacement parameters drawn at 50% probability; hydrogen atoms (except the sulfur bound) are omitted for clarity.



**S1.8 (WCA-IDipp)SeH (12·toluene)****Table S 8.** Crystallographic data for compound **12**·toluene.

|                                     |                                                                                                                                                                 |                            |
|-------------------------------------|-----------------------------------------------------------------------------------------------------------------------------------------------------------------|----------------------------|
| Compound                            | <b>12</b> ·toluene                                                                                                                                              |                            |
| Identification code                 | 2013327                                                                                                                                                         |                            |
| Empirical formula                   | C <sub>52</sub> H <sub>44</sub> BF <sub>15</sub> N <sub>2</sub> Se                                                                                              |                            |
| Formula weight                      | 1071.66                                                                                                                                                         |                            |
| Temperature                         | 100(2) K                                                                                                                                                        |                            |
| Wavelength                          | 0.71073 Å                                                                                                                                                       |                            |
| Instrument (scan mode)              | XtaLAB Synergy, Single source at offset/far, HyPix ( $\omega$ scan)                                                                                             |                            |
| Crystal system                      | Monoclinic                                                                                                                                                      |                            |
| Space group                         | <i>P</i> 2 <sub>1</sub> / <i>c</i>                                                                                                                              |                            |
| Unit cell dimensions                | a = 15.0020(4) Å                                                                                                                                                | $\alpha = 90^\circ$        |
|                                     | b = 17.0336(4) Å                                                                                                                                                | $\beta = 111.308(4)^\circ$ |
|                                     | c = 19.9857(4) Å                                                                                                                                                | $\gamma = 90^\circ$        |
| Volume                              | 4758.0(2) Å <sup>3</sup>                                                                                                                                        |                            |
| Z                                   | 4                                                                                                                                                               |                            |
| Density (calculated)                | 1.496 Mg/m <sup>3</sup>                                                                                                                                         |                            |
| Absorption coefficient              | 0.887 mm <sup>-1</sup>                                                                                                                                          |                            |
| F(000)                              | 2176                                                                                                                                                            |                            |
| Crystal habitus                     | irregular (colourless)                                                                                                                                          |                            |
| Crystal size                        | 0.236 x 0.215 x 0.138 mm <sup>3</sup>                                                                                                                           |                            |
| Theta range for data collection     | 2.630 to 40.249°                                                                                                                                                |                            |
| Index ranges                        | -27 ≤ h ≤ 27, -30 ≤ k ≤ 30, -36 ≤ l ≤ 36                                                                                                                        |                            |
| Reflections collected               | 313659                                                                                                                                                          |                            |
| Independent reflections             | 29944 [R(int) = 0.0726]                                                                                                                                         |                            |
| Completeness to theta = 25.242°     | 99.9 %                                                                                                                                                          |                            |
| Absorption correction               | Gaussian                                                                                                                                                        |                            |
| Max. and min. transmission          | 1.000 and 0.439                                                                                                                                                 |                            |
| Refinement method                   | Full-matrix least-squares on F <sup>2</sup>                                                                                                                     |                            |
| Data / restraints / parameters      | 29944 / 0 / 650                                                                                                                                                 |                            |
| Goodness-of-fit on F <sup>2</sup>   | 1.018                                                                                                                                                           |                            |
| Final R indices [I > 2σ(I)]         | R1 = 0.0537, wR2 = 0.1255                                                                                                                                       |                            |
| R indices (all data)                | R1 = 0.0950, wR2 = 0.1437                                                                                                                                       |                            |
| Largest diff. peak and hole         | 3.071 and -1.713 e.Å <sup>-3</sup>                                                                                                                              |                            |
| Crystallisation Details:            | A saturated solution of WCA-IDipp-SEH in toluene was layered with nhexane at ambient temperatures under inert conditions.                                       |                            |
| Solution                            | SHELXT-2014/5 (Sheldrick 2015)                                                                                                                                  |                            |
| Refinement                          | SHELXL-2018/3 (Sheldrick 2018)                                                                                                                                  |                            |
| Interface                           | OLEX2 v1.2                                                                                                                                                      |                            |
| Measurement and Refinement Details: | The hydrogen atom bound to the Se atom was located in the difference electron density map and its position was fixed. The displacement parameters were refined. |                            |

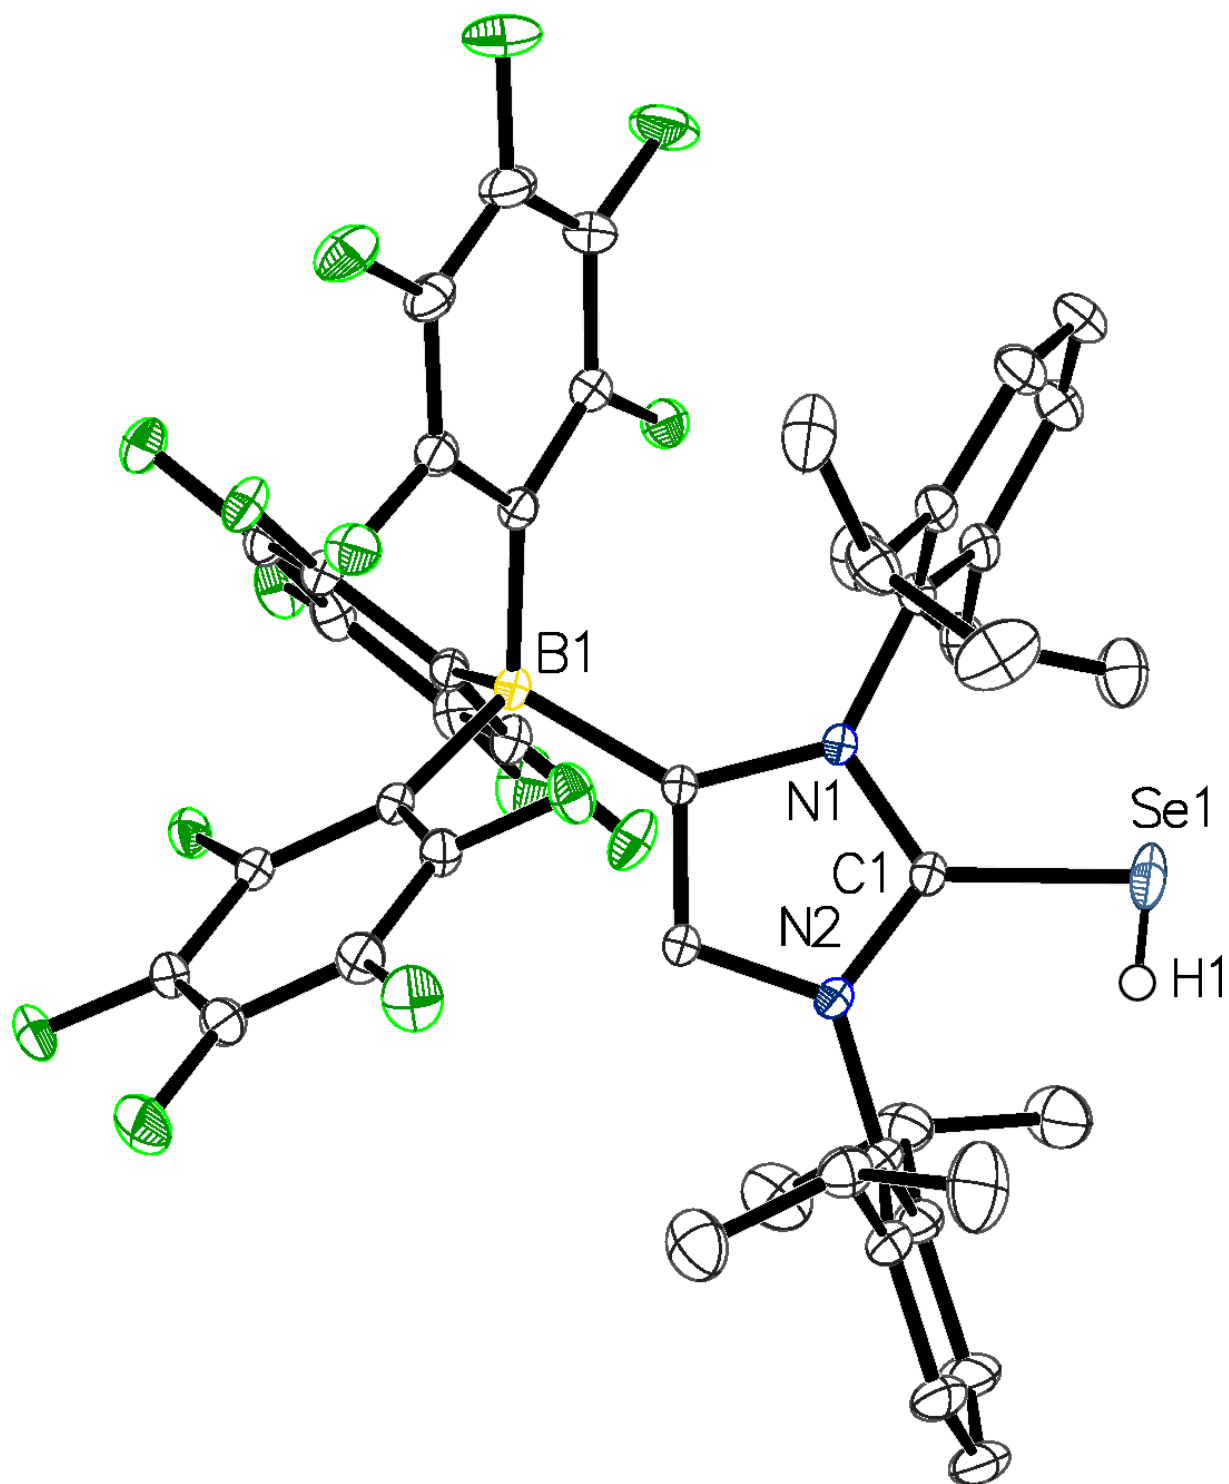

**Figure S 8.** Molecular structure of 12-toluene with thermal displacement parameters drawn at 50% probability; hydrogen atoms (except the selenium bound) and one toluene molecule are omitted for clarity.

**S1.9** (WCA-IDipp)<sub>2</sub>S<sub>2</sub> (**13**·2 *n*-hexane·THF)**Table S 9.** Crystallographic data for compound **13**·2 *n*-hexane·THF.

|                                     |                                                                                                          |                        |
|-------------------------------------|----------------------------------------------------------------------------------------------------------|------------------------|
| Compound                            | <b>13</b> ·2 <i>n</i> -hexane·THF                                                                        |                        |
| Identification code                 | 2013328                                                                                                  |                        |
| Empirical formula                   | C <sub>106</sub> H <sub>106</sub> B <sub>2</sub> F <sub>30</sub> N <sub>4</sub> OS <sub>2</sub>          |                        |
| Formula weight                      | 2107.68                                                                                                  |                        |
| Temperature                         | 100(2) K                                                                                                 |                        |
| Wavelength                          | 0.7107 Å                                                                                                 |                        |
| Instrument (scan mode)              | Xcalibur, Eos ( $\omega$ scan)                                                                           |                        |
| Crystal system                      | Triclinic                                                                                                |                        |
| Space group                         | <i>P</i> -1                                                                                              |                        |
| Unit cell dimensions                | a = 17.0630(8) Å                                                                                         | $\alpha$ = 91.180(4)°  |
|                                     | b = 17.1310(10) Å                                                                                        | $\beta$ = 90.880(4)°   |
|                                     | c = 19.4910(10) Å                                                                                        | $\gamma$ = 119.760(6)° |
| Volume                              | 4942.7(5) Å <sup>3</sup>                                                                                 |                        |
| Z                                   | 2                                                                                                        |                        |
| Density (calculated)                | 1.416 Mg/m <sup>3</sup>                                                                                  |                        |
| Absorption coefficient              | 0.163 mm <sup>-1</sup>                                                                                   |                        |
| F(000)                              | 2180                                                                                                     |                        |
| Crystal habitus                     | irregular (orange)                                                                                       |                        |
| Crystal size                        | 0.583 x 0.481 x 0.337 mm <sup>3</sup>                                                                    |                        |
| Theta range for data collection     | 2.375 to 26.371°                                                                                         |                        |
| Index ranges                        | -21 ≤ h ≤ 21, -21 ≤ k ≤ 21, -24 ≤ l ≤ 24                                                                 |                        |
| Reflections collected               | 22760                                                                                                    |                        |
| Independent reflections             | 22760 [R(int) = ?]                                                                                       |                        |
| Completeness to theta = 25.241°     | 99.9 %                                                                                                   |                        |
| Absorption correction               | Semi-empirical from equivalents                                                                          |                        |
| Max. and min. transmission          | 1.00000 and 0.94743                                                                                      |                        |
| Refinement method                   | Full-matrix least-squares on F <sup>2</sup>                                                              |                        |
| Data / restraints / parameters      | 22760 / 102 / 1327                                                                                       |                        |
| Goodness-of-fit on F <sup>2</sup>   | 1.045                                                                                                    |                        |
| Final R indices [I > 2σ(I)]         | R1 = 0.0812, wR2 = 0.2169                                                                                |                        |
| R indices (all data)                | R1 = 0.0959, wR2 = 0.2232                                                                                |                        |
| Largest diff. peak and hole         | 0.622 and -0.635 e.Å <sup>-3</sup>                                                                       |                        |
| Crystallisation Details:            | A saturated solution of WCA-IDipp-S-S-IDipp-WCA in THF was layered with hexane at ambient temperatures.  |                        |
| Solution                            | SHELXT-2014/5 (Sheldrick 2015)                                                                           |                        |
| Refinement                          | SHELXL-2018/3 (Sheldrick 2018)                                                                           |                        |
| Interface                           | OLEX2 v1.2                                                                                               |                        |
| Measurement and Refinement Details: | The crystal was a two-component twin. Therefore, the solution was refined as such with a BASF of 0.4354. |                        |

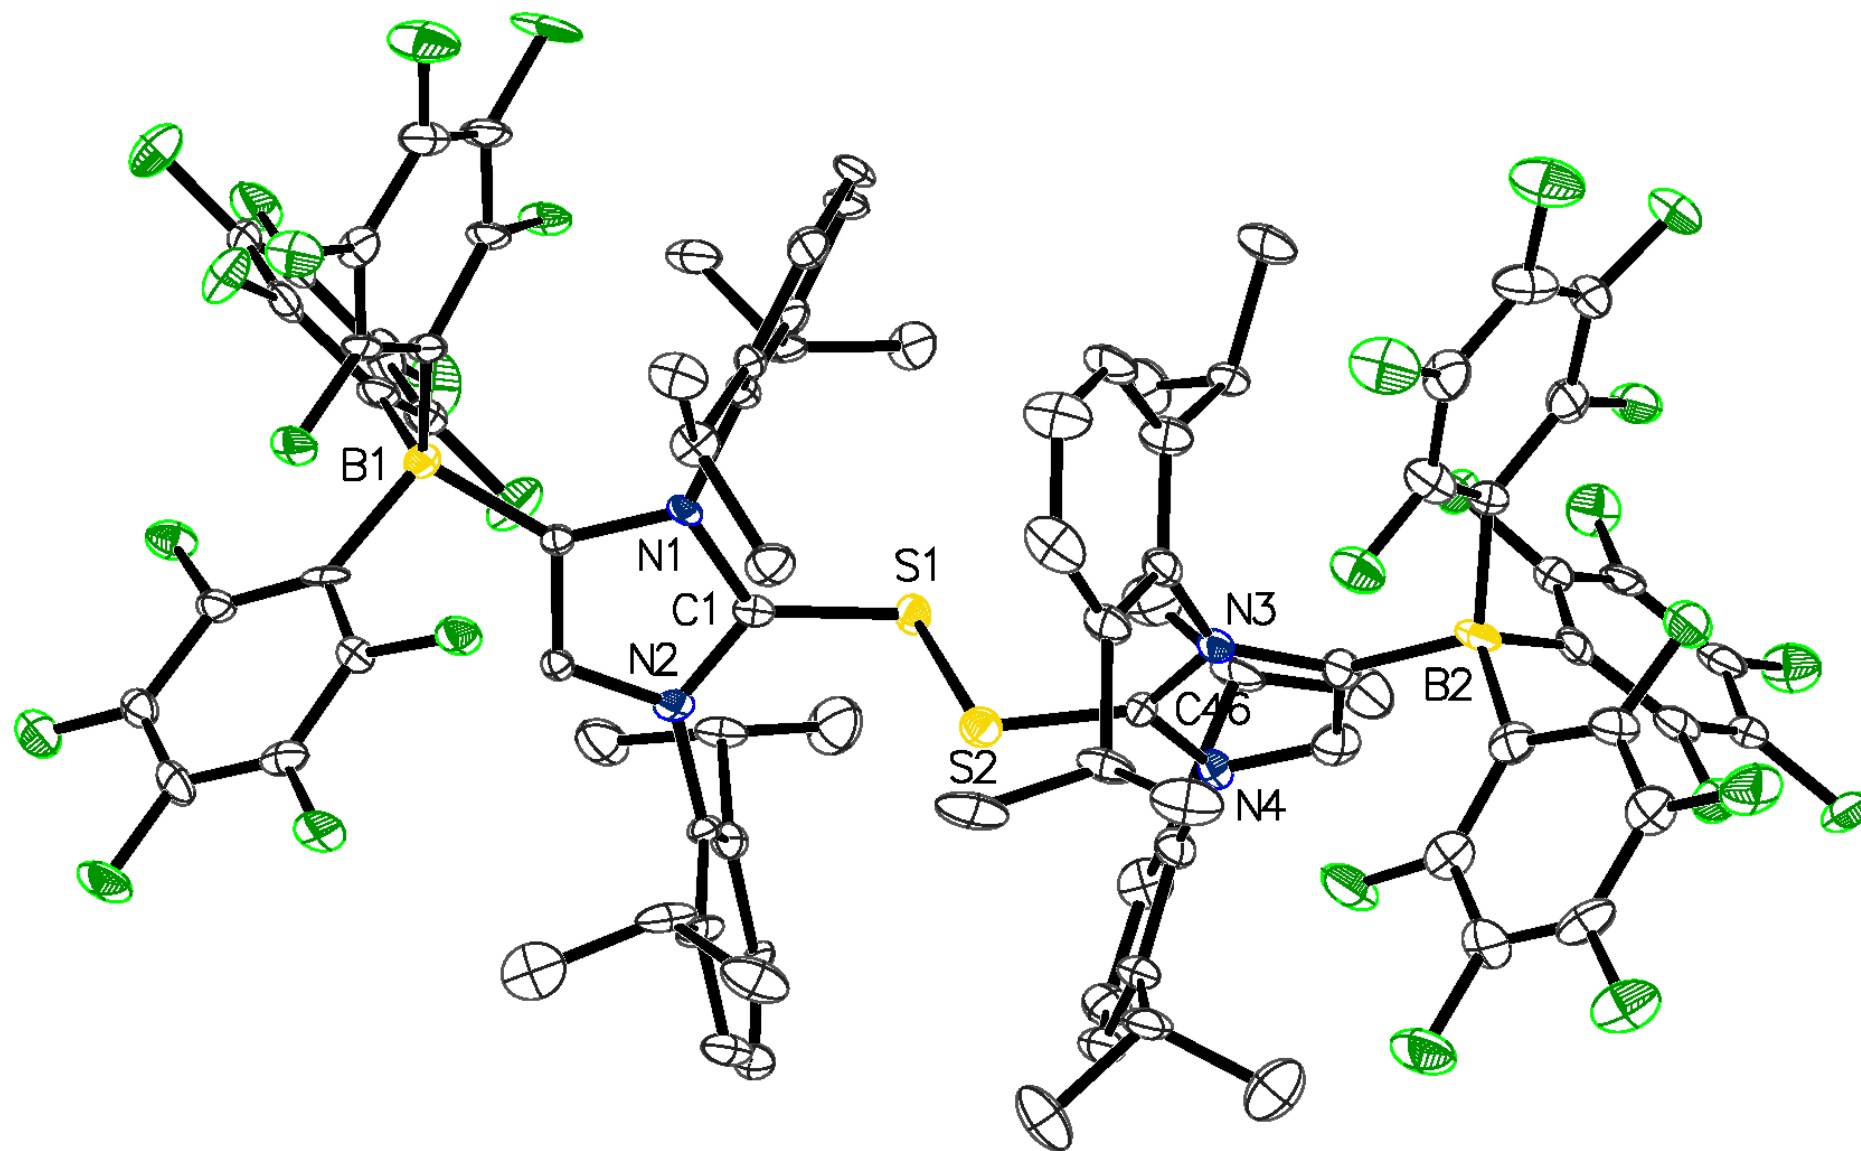

**Figure S 9.** Molecular structure of 13·2 *n*-hexane-THF with thermal displacement parameters drawn at 50% probability; hydrogen atoms, two co-crystallized *n*-hexane and one THF molecule are omitted for clarity.

**S1.10** (WCA-IDipp)<sub>2</sub>Se<sub>2</sub> (**14**·*n*-hexane·PhCl)**Table S 10.** Crystallographic data for compound **14**·*n*-hexane·PhCl.

|                                    |                                                                                                                                                                                                          |                     |
|------------------------------------|----------------------------------------------------------------------------------------------------------------------------------------------------------------------------------------------------------|---------------------|
| Compound                           | <b>14</b> · <i>n</i> -hexane·PhCl                                                                                                                                                                        |                     |
| Identification code                | 2013329                                                                                                                                                                                                  |                     |
| Empirical formula                  | C <sub>102</sub> H <sub>89</sub> B <sub>2</sub> ClF <sub>30</sub> N <sub>4</sub> Se <sub>2</sub>                                                                                                         |                     |
| Formula weight                     | 2155.76                                                                                                                                                                                                  |                     |
| Temperature                        | 100(2) K                                                                                                                                                                                                 |                     |
| Wavelength                         | 1.54184 Å                                                                                                                                                                                                |                     |
| Instrument (scan mode)             | XtaLAB Synergy, Single source at home/near, HyPix ( $\omega$ scan)                                                                                                                                       |                     |
| Crystal system                     | Orthorhombic                                                                                                                                                                                             |                     |
| Space group                        | <i>P</i> 2 <sub>1</sub> 2 <sub>1</sub> 2 <sub>1</sub>                                                                                                                                                    |                     |
| Unit cell dimensions               | a = 12.56245(6) Å                                                                                                                                                                                        | $\alpha = 90^\circ$ |
|                                    | b = 26.01067(13) Å                                                                                                                                                                                       | $\beta = 90^\circ$  |
|                                    | c = 29.40849(13) Å                                                                                                                                                                                       | $\gamma = 90^\circ$ |
| Volume                             | 9609.45(8) Å <sup>3</sup>                                                                                                                                                                                |                     |
| Z                                  | 4                                                                                                                                                                                                        |                     |
| Density (calculated)               | 1.490 Mg/m <sup>3</sup>                                                                                                                                                                                  |                     |
| Absorption coefficient             | 2.172 mm <sup>-1</sup>                                                                                                                                                                                   |                     |
| F(000)                             | 4376                                                                                                                                                                                                     |                     |
| Crystal habitus                    | block (orange)                                                                                                                                                                                           |                     |
| Crystal size                       | 0.269 x 0.132 x 0.075 mm <sup>3</sup>                                                                                                                                                                    |                     |
| Theta range for data collection    | 2.268 to 77.130°                                                                                                                                                                                         |                     |
| Index ranges                       | -15 ≤ h ≤ 15, -31 ≤ k ≤ 32, -36 ≤ l ≤ 37                                                                                                                                                                 |                     |
| Reflections collected              | 273369                                                                                                                                                                                                   |                     |
| Independent reflections            | 19811 [R(int) = 0.0479]                                                                                                                                                                                  |                     |
| Completeness to theta = 67.684°    | 100.0 %                                                                                                                                                                                                  |                     |
| Absorption correction              | Gaussian                                                                                                                                                                                                 |                     |
| Max. and min. transmission         | 1.000 and 0.443                                                                                                                                                                                          |                     |
| Refinement method                  | Full-matrix least-squares on F <sup>2</sup>                                                                                                                                                              |                     |
| Data / restraints / parameters     | 19811 / 253 / 1344                                                                                                                                                                                       |                     |
| Goodness-of-fit on F <sup>2</sup>  | 1.066                                                                                                                                                                                                    |                     |
| Final R indices [I > 2σ(I)]        | R1 = 0.0479, wR2 = 0.1339                                                                                                                                                                                |                     |
| R indices (all data)               | R1 = 0.0485, wR2 = 0.1346                                                                                                                                                                                |                     |
| Absolute structure parameter       | -0.006(2)                                                                                                                                                                                                |                     |
| Largest diff. peak and hole        | 1.855 and -1.057 e.Å <sup>-3</sup>                                                                                                                                                                       |                     |
| Crystallisation Details:           | A saturated solution of WCA-IDipp-Se-Se-IDipp-WCA in chlorobenzene was layered with hexane at ambient temperatures.                                                                                      |                     |
| Solution                           | SHELXT-2014/5 (Sheldrick 2015)                                                                                                                                                                           |                     |
| Refinement                         | SHELXL-2018/3 (Sheldrick 2018)                                                                                                                                                                           |                     |
| Interface                          | OLEX2 v1.2                                                                                                                                                                                               |                     |
| Measurement and Refinement Details | One <i>n</i> -hexane molecule is disordered and was refined over two positions. Several SADI and ISOR restraints were applied. One chlorobenzene molecule was refined with the restraints FLAT and ISOR. |                     |

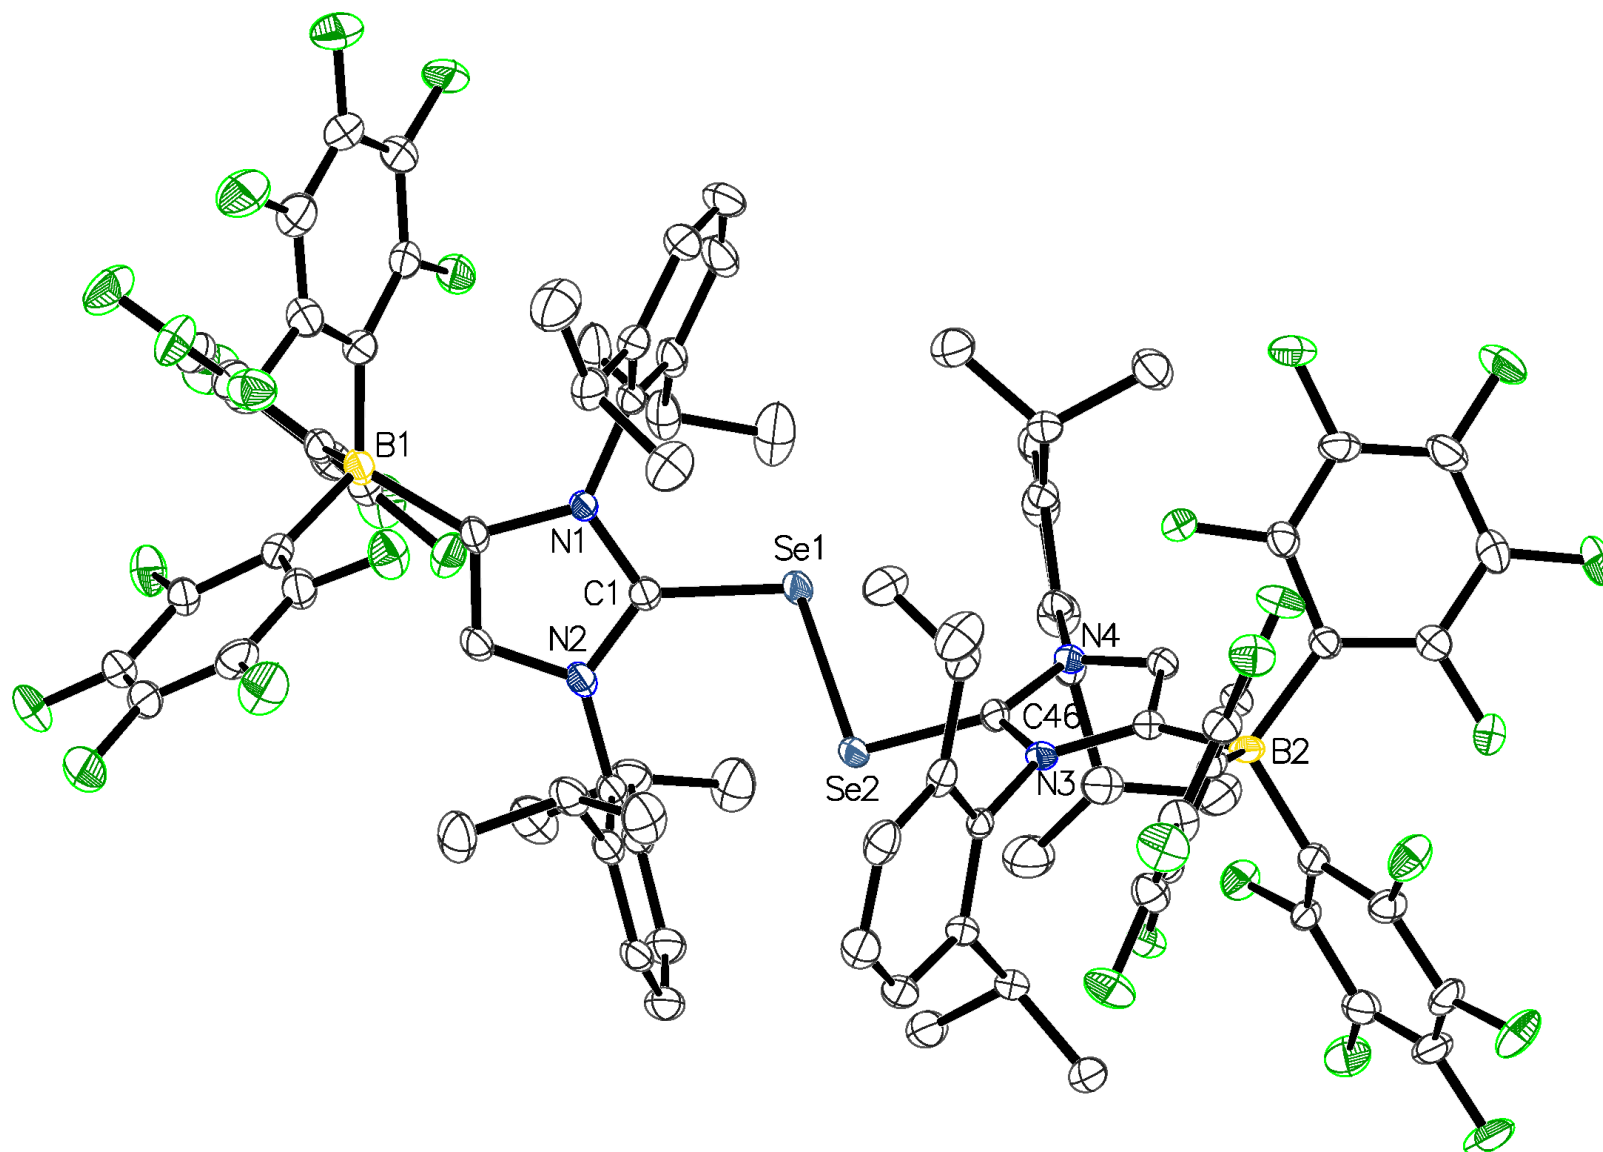

**Figure S10.** Molecular structure of 14-*n*-hexane-PhCl with thermal displacement parameters drawn at 50% probability; hydrogen atoms, one co-crystallized chlorobenzene and one *n*-hexane molecule are omitted for clarity.

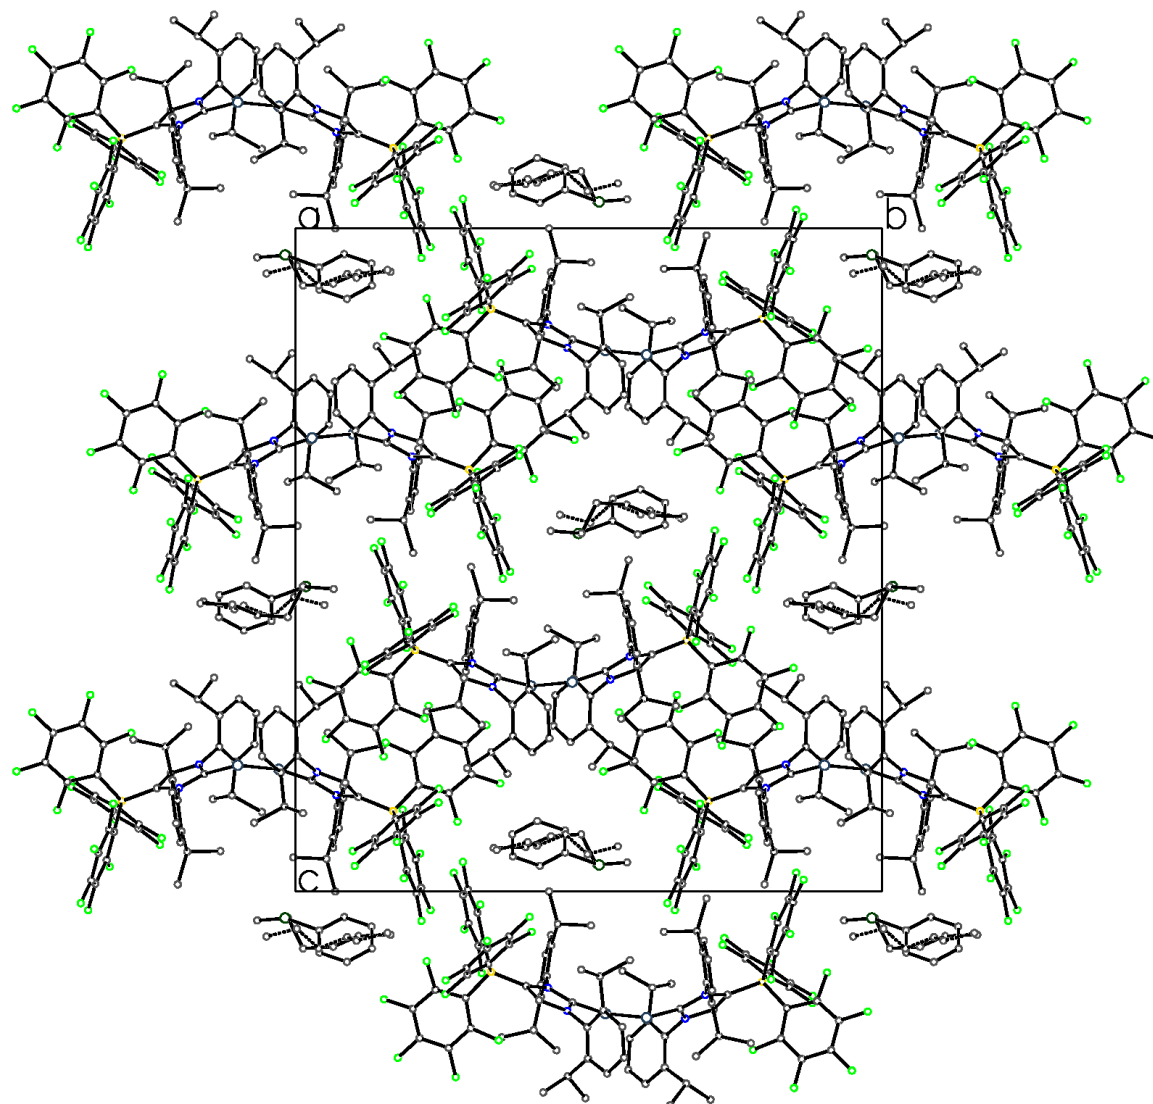

**Figure S11.** Packing diagram of **14-*n*-hexane-PhCl**. The view is along the *a* axis.

**S1.11 (WCA-IDipp)<sub>2</sub>Se<sub>2</sub> (14')****Table S 11.** Crystallographic data for compound **14'**.

|                                     |                                                                                                                                                                                                                                                                                                                                                                                                                                                                                                                                                                          |                         |
|-------------------------------------|--------------------------------------------------------------------------------------------------------------------------------------------------------------------------------------------------------------------------------------------------------------------------------------------------------------------------------------------------------------------------------------------------------------------------------------------------------------------------------------------------------------------------------------------------------------------------|-------------------------|
| Compound                            | <b>14'</b>                                                                                                                                                                                                                                                                                                                                                                                                                                                                                                                                                               |                         |
| Identification code                 | 2013330                                                                                                                                                                                                                                                                                                                                                                                                                                                                                                                                                                  |                         |
| Empirical formula                   | C <sub>90</sub> H <sub>70</sub> B <sub>2</sub> F <sub>30</sub> N <sub>4</sub> Se <sub>2</sub>                                                                                                                                                                                                                                                                                                                                                                                                                                                                            |                         |
| Formula weight                      | 1957.04                                                                                                                                                                                                                                                                                                                                                                                                                                                                                                                                                                  |                         |
| Temperature                         | 100(2) K                                                                                                                                                                                                                                                                                                                                                                                                                                                                                                                                                                 |                         |
| Wavelength                          | 1.54184 Å                                                                                                                                                                                                                                                                                                                                                                                                                                                                                                                                                                |                         |
| Instrument (scan mode)              | XtaLAB Synergy, Single source at home/near, HyPix ( $\omega$ scan)                                                                                                                                                                                                                                                                                                                                                                                                                                                                                                       |                         |
| Crystal system                      | Triclinic                                                                                                                                                                                                                                                                                                                                                                                                                                                                                                                                                                |                         |
| Space group                         | P-1                                                                                                                                                                                                                                                                                                                                                                                                                                                                                                                                                                      |                         |
| Unit cell dimensions                | a = 11.08186(4) Å                                                                                                                                                                                                                                                                                                                                                                                                                                                                                                                                                        | $\alpha$ = 101.7487(2)° |
|                                     | b = 13.56275(5) Å                                                                                                                                                                                                                                                                                                                                                                                                                                                                                                                                                        | $\beta$ = 108.1065(3)°  |
|                                     | c = 15.67500(4) Å                                                                                                                                                                                                                                                                                                                                                                                                                                                                                                                                                        | $\gamma$ = 95.1486(3)°  |
| Volume                              | 2162.535(12) Å <sup>3</sup>                                                                                                                                                                                                                                                                                                                                                                                                                                                                                                                                              |                         |
| Z                                   | 1                                                                                                                                                                                                                                                                                                                                                                                                                                                                                                                                                                        |                         |
| Density (calculated)                | 1.503 Mg/m <sup>3</sup>                                                                                                                                                                                                                                                                                                                                                                                                                                                                                                                                                  |                         |
| Absorption coefficient              | 2.074 mm <sup>-1</sup>                                                                                                                                                                                                                                                                                                                                                                                                                                                                                                                                                   |                         |
| F(000)                              | 986                                                                                                                                                                                                                                                                                                                                                                                                                                                                                                                                                                      |                         |
| Crystal habitus                     | irregular (pink)                                                                                                                                                                                                                                                                                                                                                                                                                                                                                                                                                         |                         |
| Crystal size                        | 0.243 x 0.198 x 0.138 mm <sup>3</sup>                                                                                                                                                                                                                                                                                                                                                                                                                                                                                                                                    |                         |
| Theta range for data collection     | 3.059 to 77.484°                                                                                                                                                                                                                                                                                                                                                                                                                                                                                                                                                         |                         |
| Index ranges                        | -14 ≤ h ≤ 13, -17 ≤ k ≤ 17, -19 ≤ l ≤ 19                                                                                                                                                                                                                                                                                                                                                                                                                                                                                                                                 |                         |
| Reflections collected               | 90726                                                                                                                                                                                                                                                                                                                                                                                                                                                                                                                                                                    |                         |
| Independent reflections             | 9039 [R(int) = 0.0188]                                                                                                                                                                                                                                                                                                                                                                                                                                                                                                                                                   |                         |
| Completeness to theta = 67.684°     | 99.9 %                                                                                                                                                                                                                                                                                                                                                                                                                                                                                                                                                                   |                         |
| Absorption correction               | Gaussian                                                                                                                                                                                                                                                                                                                                                                                                                                                                                                                                                                 |                         |
| Max. and min. transmission          | 1.000 and 0.336                                                                                                                                                                                                                                                                                                                                                                                                                                                                                                                                                          |                         |
| Refinement method                   | Full-matrix least-squares on F <sup>2</sup>                                                                                                                                                                                                                                                                                                                                                                                                                                                                                                                              |                         |
| Data / restraints / parameters      | 9039 / 132 / 672                                                                                                                                                                                                                                                                                                                                                                                                                                                                                                                                                         |                         |
| Goodness-of-fit on F <sup>2</sup>   | 1.030                                                                                                                                                                                                                                                                                                                                                                                                                                                                                                                                                                    |                         |
| Final R indices [I > 2σ(I)]         | R1 = 0.0352, wR2 = 0.0861                                                                                                                                                                                                                                                                                                                                                                                                                                                                                                                                                |                         |
| R indices (all data)                | R1 = 0.0355, wR2 = 0.0862                                                                                                                                                                                                                                                                                                                                                                                                                                                                                                                                                |                         |
| Largest diff. peak and hole         | 0.729 and -0.572 e.Å <sup>-3</sup>                                                                                                                                                                                                                                                                                                                                                                                                                                                                                                                                       |                         |
| Crystallisation Details:            | A saturated solution of <b>13</b> in toluene was layered with <i>n</i> hexane at ambient temperatures.                                                                                                                                                                                                                                                                                                                                                                                                                                                                   |                         |
| Solution                            | SHELXT-2014/5 (Sheldrick 2015)                                                                                                                                                                                                                                                                                                                                                                                                                                                                                                                                           |                         |
| Refinement                          | SHELXL-2018/3 (Sheldrick 2018)                                                                                                                                                                                                                                                                                                                                                                                                                                                                                                                                           |                         |
| Interface                           | OLEX2 v1.2                                                                                                                                                                                                                                                                                                                                                                                                                                                                                                                                                               |                         |
| Measurement and Refinement Details: | One methyl group from the isopropyl group adjacent to the borate moiety is disordered and was refined over two positions. No restraints were applied. One pentafluorophenyl moiety is disordered and was refined over two positions. One ISOR restraint was applied. Residual electron density was removed with SQUEEZE. The used solvent for crystallization was toluene and there were several positions possible for the disordered molecule. Refinement with disorder models were insufficient due to the many positions, hence the removal of the electron density. |                         |



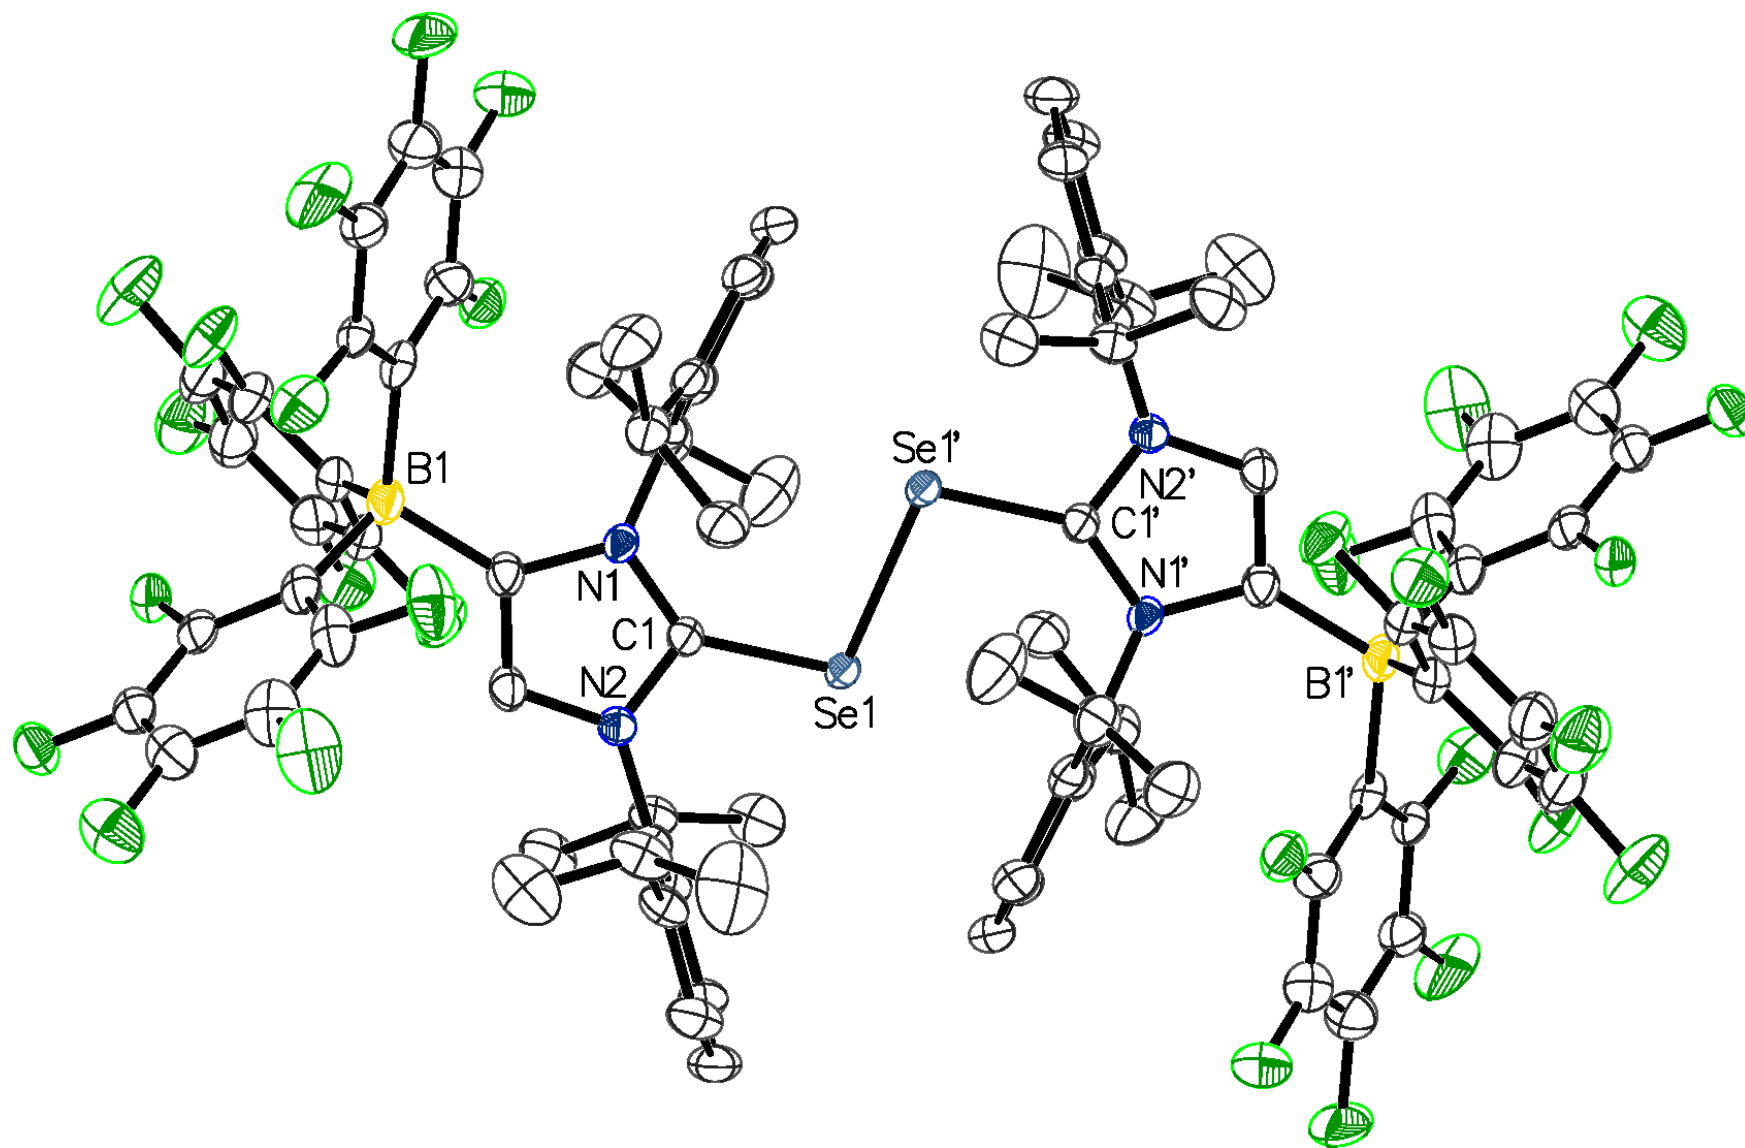

**Figure S12.** Molecular structure of **14'** with thermal displacement parameters drawn at 50% probability; hydrogen atoms are omitted for clarity.

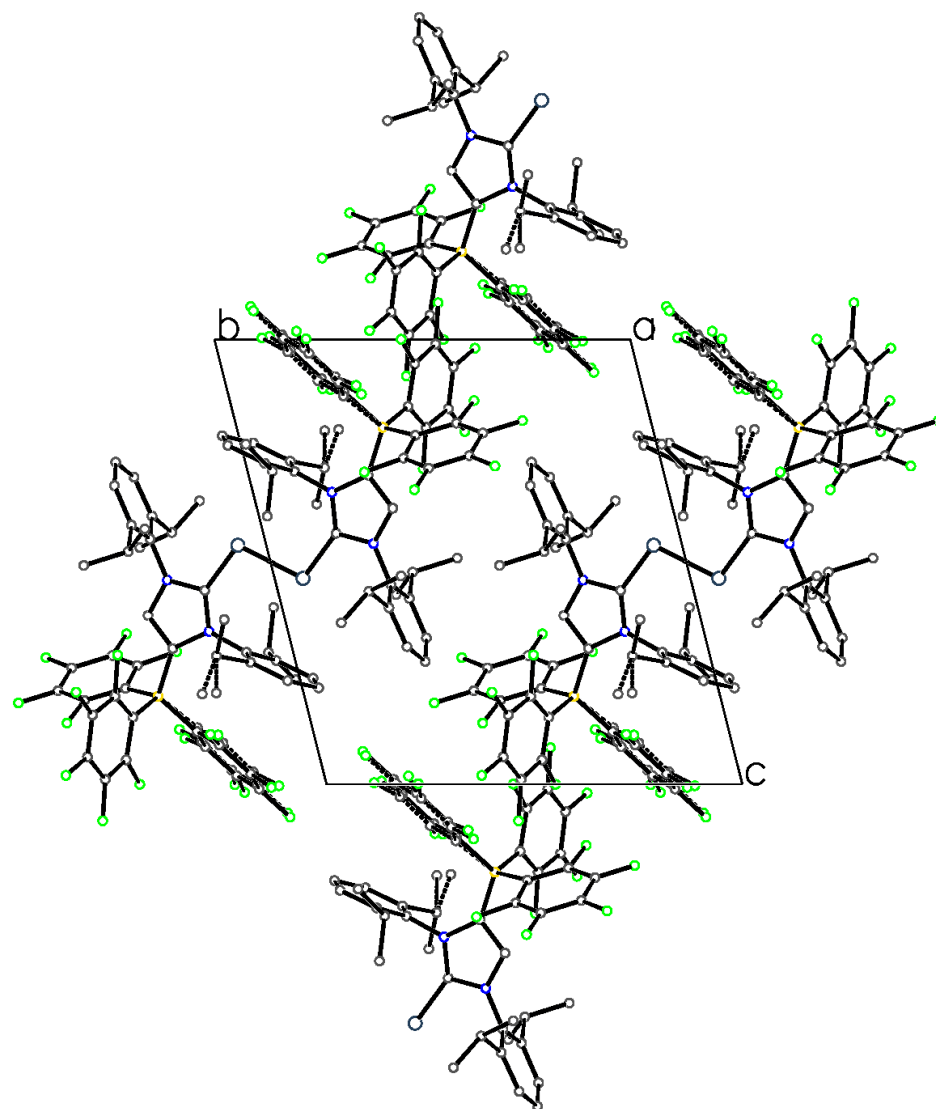

Figure S13. Packing diagram of 14'. The view is along the a axis.

## S2 $^1\text{H}$ , $^{11}\text{B}$ , $^{13}\text{C}$ , $^{19}\text{F}$ and $^{77}\text{Se}$ NMR Spectra

### S2.1 $(\text{THF})_3\text{Li}[(\text{IDipp})=\text{S}]$ (**4**)

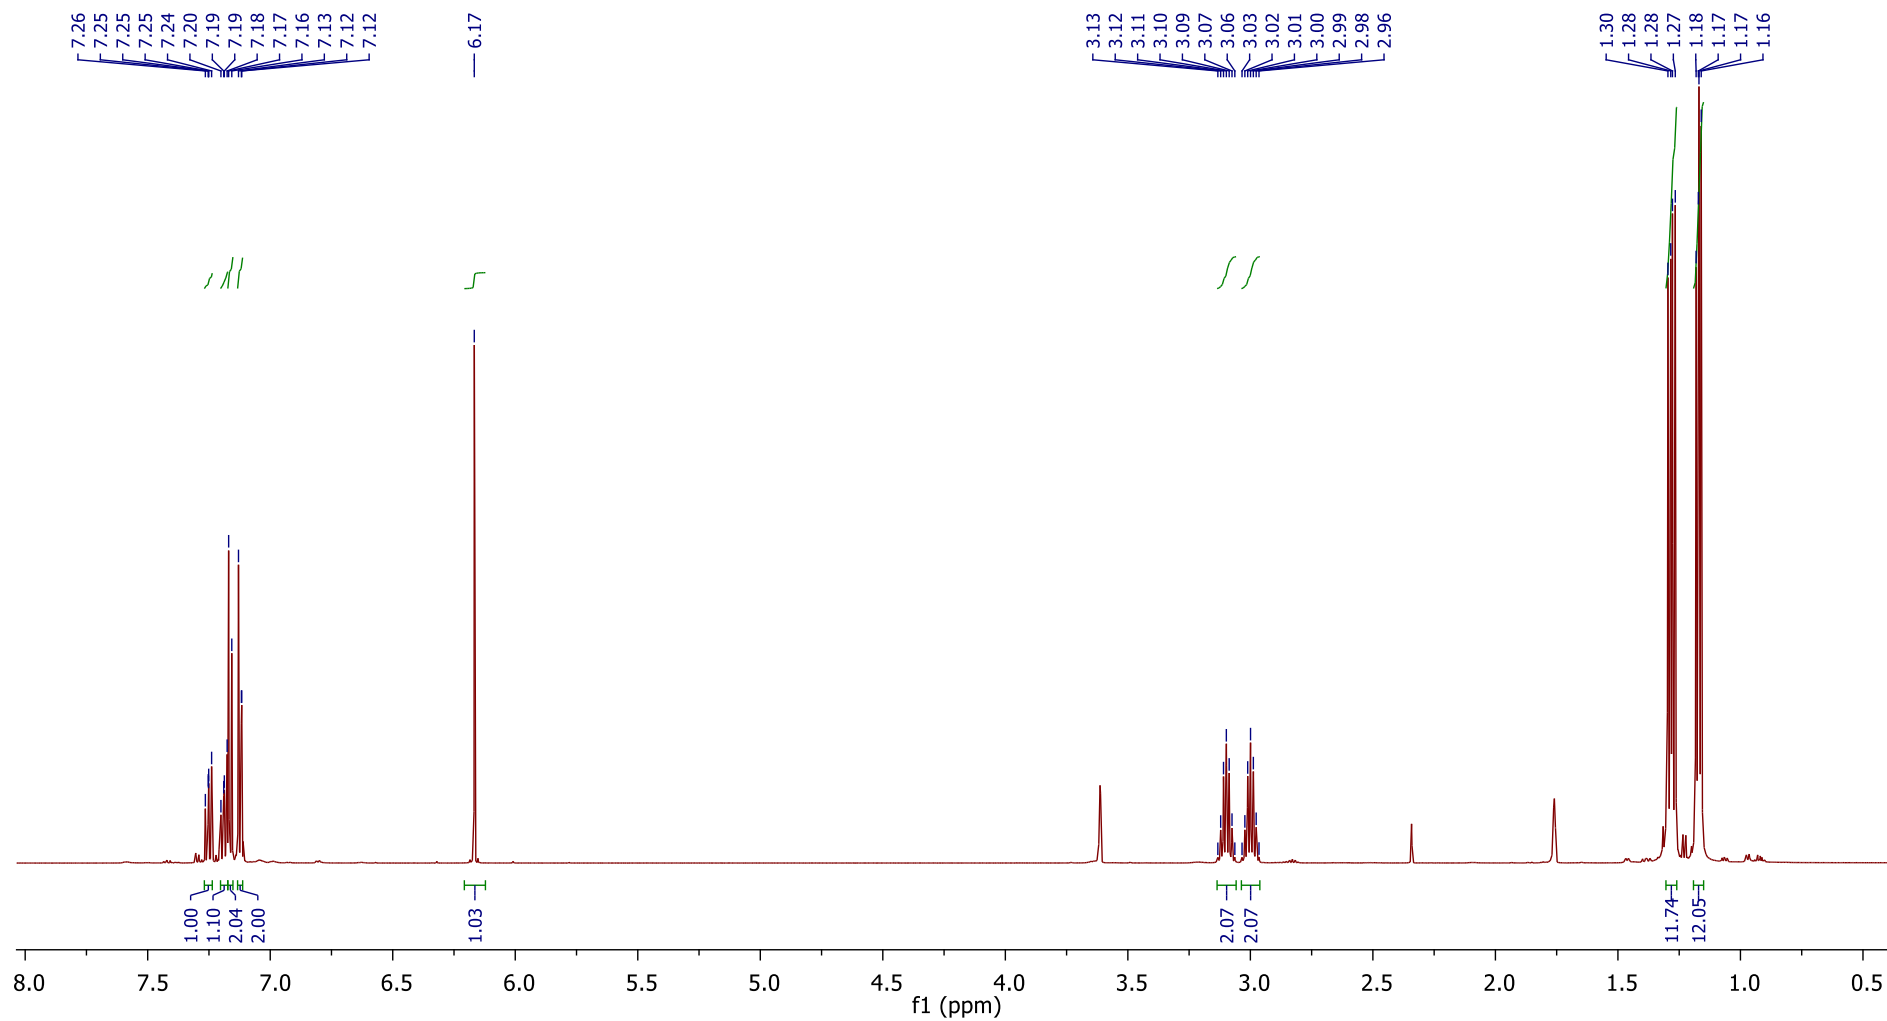

Figure S14.  $^1\text{H}$  NMR spectrum (600 MHz,  $\text{THF}-d_8$ , 298K) of  $(\text{THF})_3\text{Li}[(\text{IDipp})=\text{S}]$  (**4**).

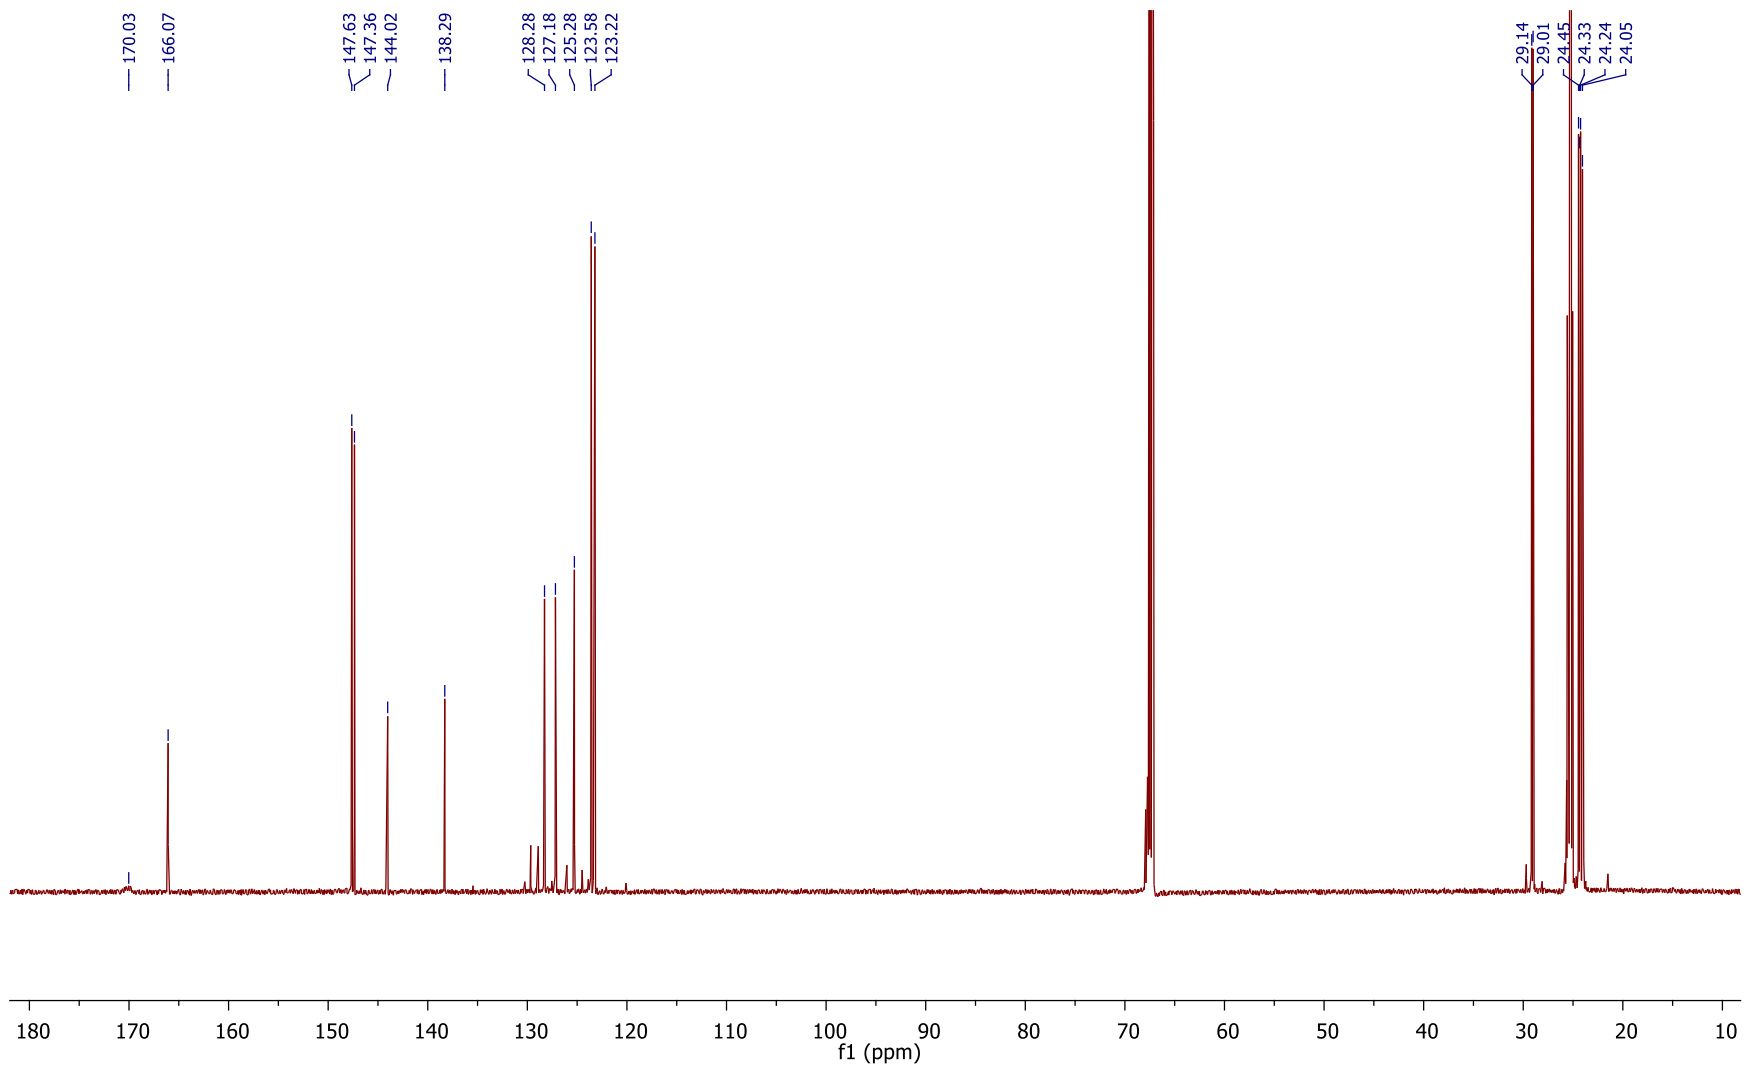

**Figure S15.**  $^{13}\text{C}$  NMR spectrum (152 MHz,  $\text{THF-}d_8$ , 298K) of  $(\text{THF})_3\text{Li}[(\text{IDipp})=\text{S}]$  (**4**). Note: There are two signals in the  $^{13}\text{C}$  NMR spectrum, which give a cross peak in the  $^1\text{H}$ - $^{13}\text{C}$ -HMBC spectrum to the backbone proton signal at 6.17 ppm in the  $^1\text{H}$  NMR spectrum. One is the signal at 170 ppm and the other one is the signal at 166 ppm. These two signals correspond to either the CLi or CS. The CLi carbon atom has carbene character, and the signal should have lower intensity than the corresponding CS signal. Therefore, the signal at 170 ppm was assigned to CLi and the signal at 166 ppm was assigned to CS.

S2.2 [(WCA-IDipp)O]Li·3THF (6·3THF)

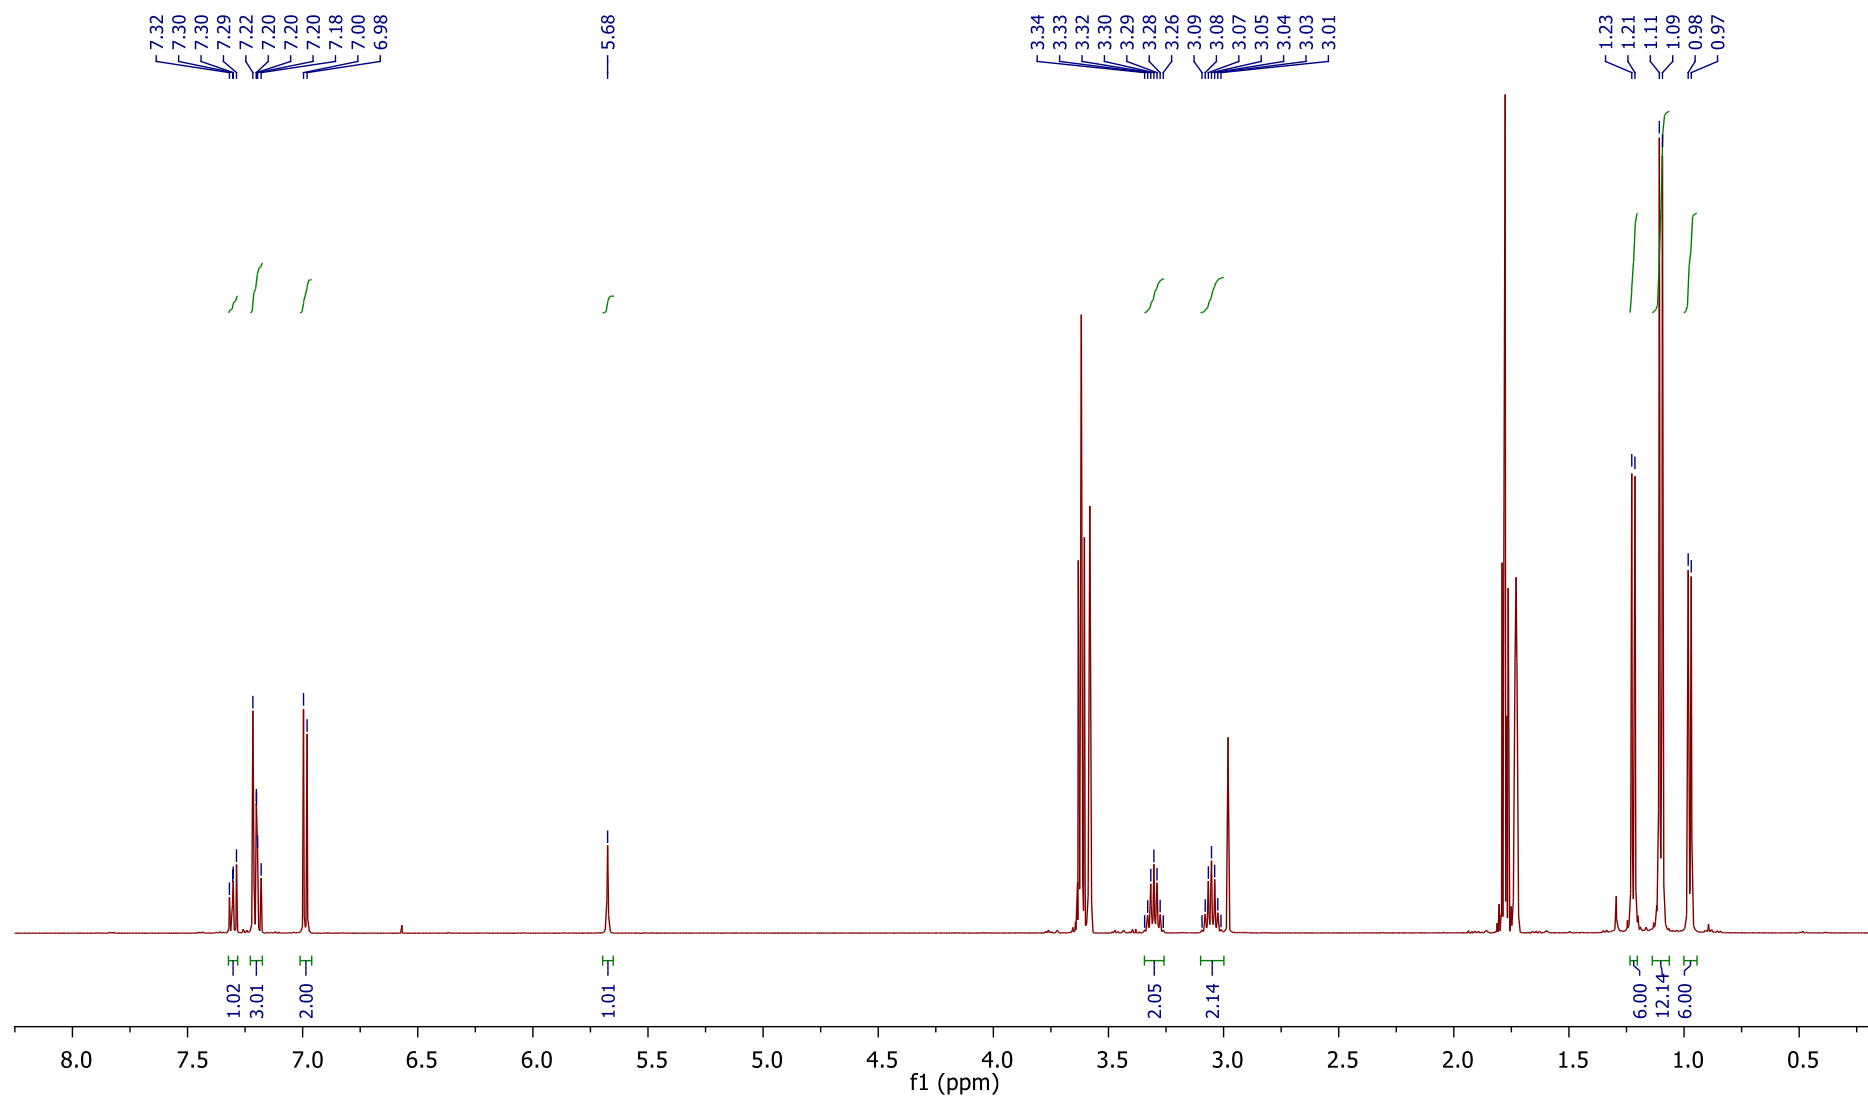

Figure S16.  $^1\text{H}$  NMR spectrum (500 MHz,  $\text{THF-}d_8$ , 298K) of [(WCA-IDipp)O]Li·3THF (6·3THF).

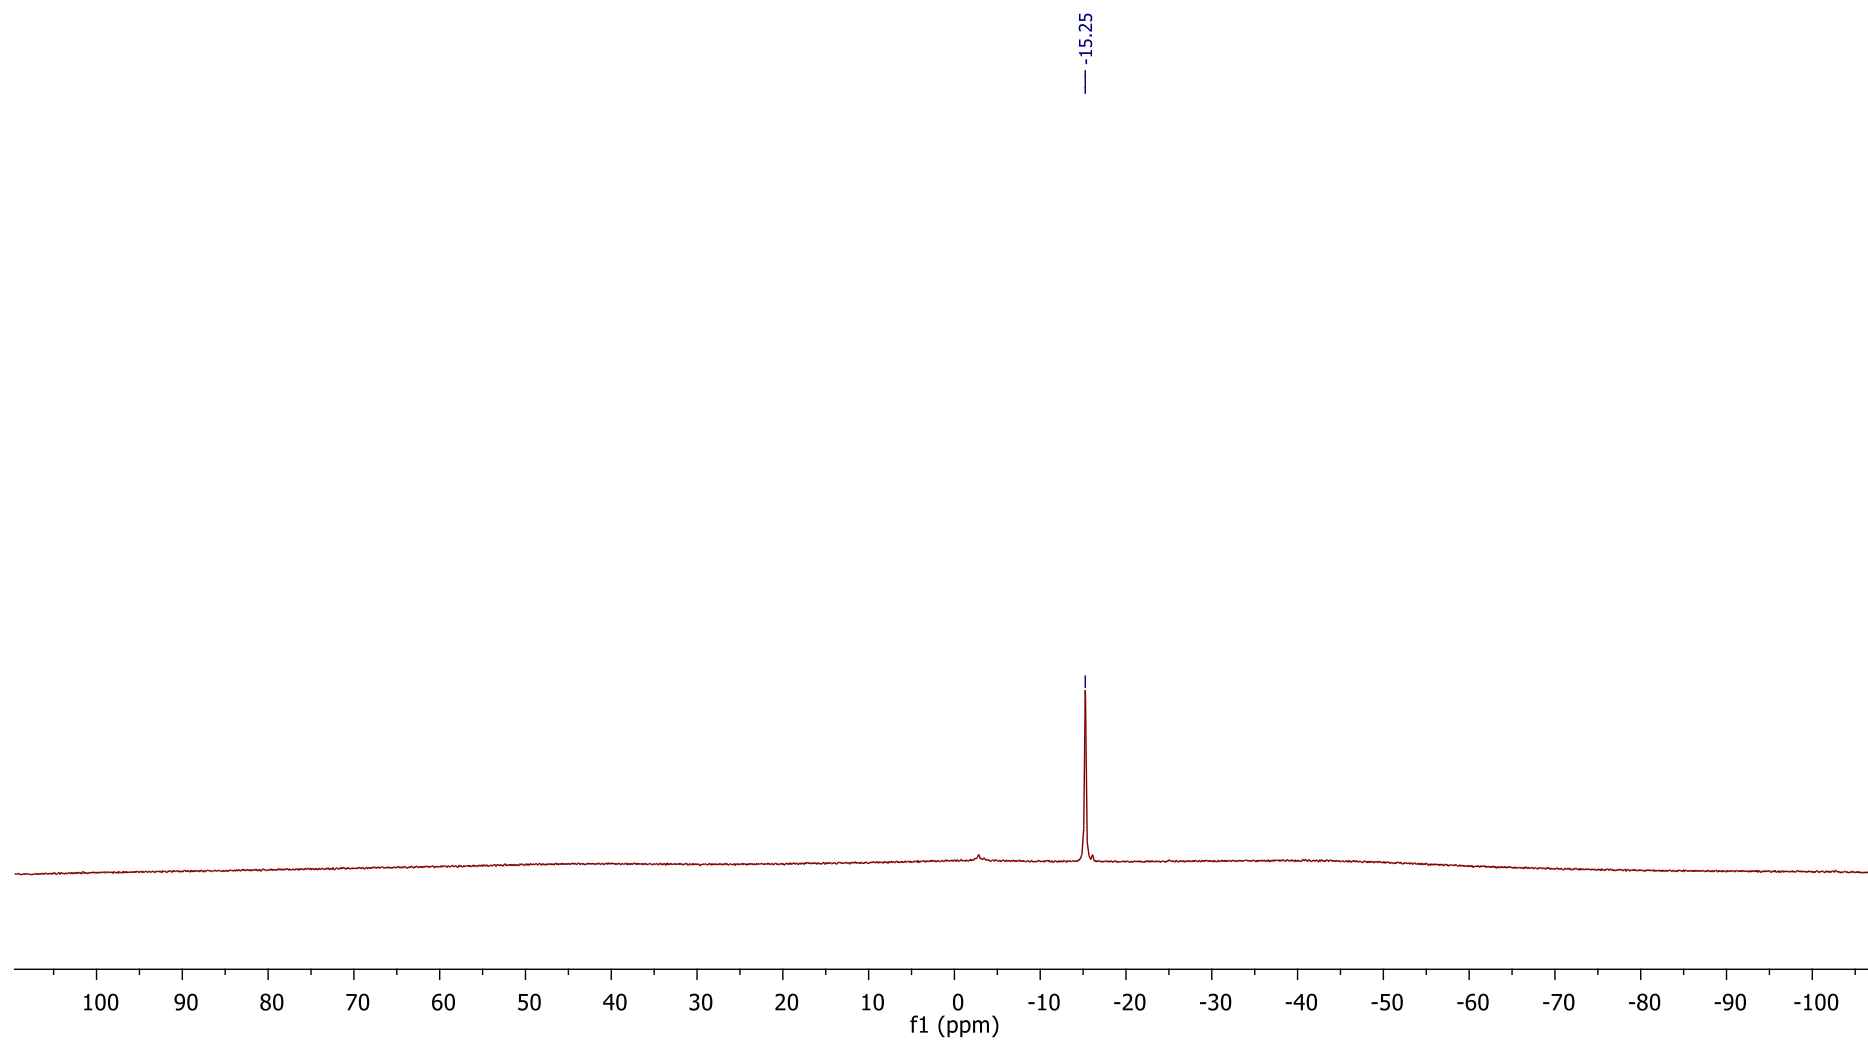

**Figure S 17.**  $^{11}\text{B}$  NMR spectrum (96 MHz,  $\text{THF-}d_8$ , 298K) of  $[(\text{WCA-IDipp})\text{O}]\text{Li}\cdot 3\text{THF}$  (**6** $\cdot 3\text{THF}$ ).

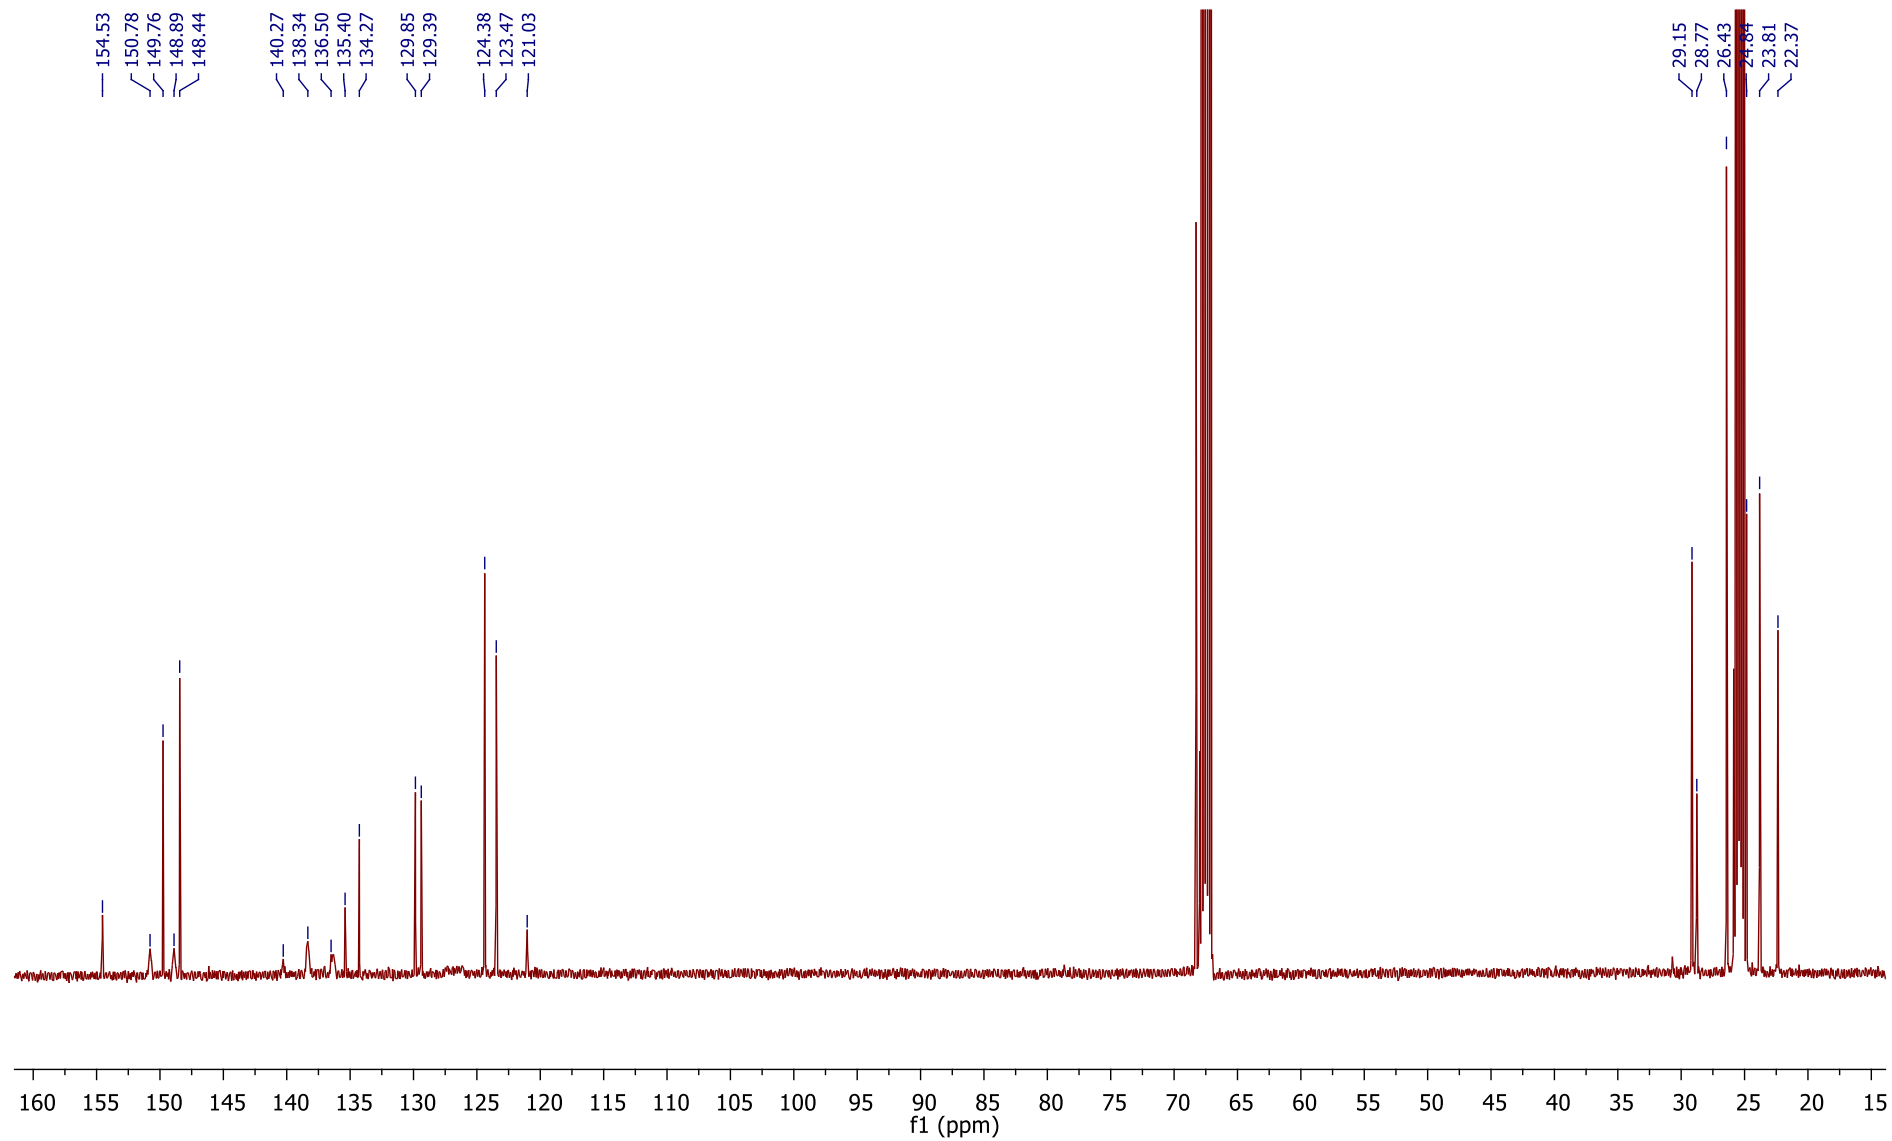

Figure S 18.  $^{13}\text{C}$  NMR spectrum (126 MHz,  $\text{THF-}d_8$ , 298K) of  $[(\text{WCA-IDipp})\text{O}]\text{Li}\cdot 3\text{THF}$  (**6** $\cdot 3\text{THF}$ ).

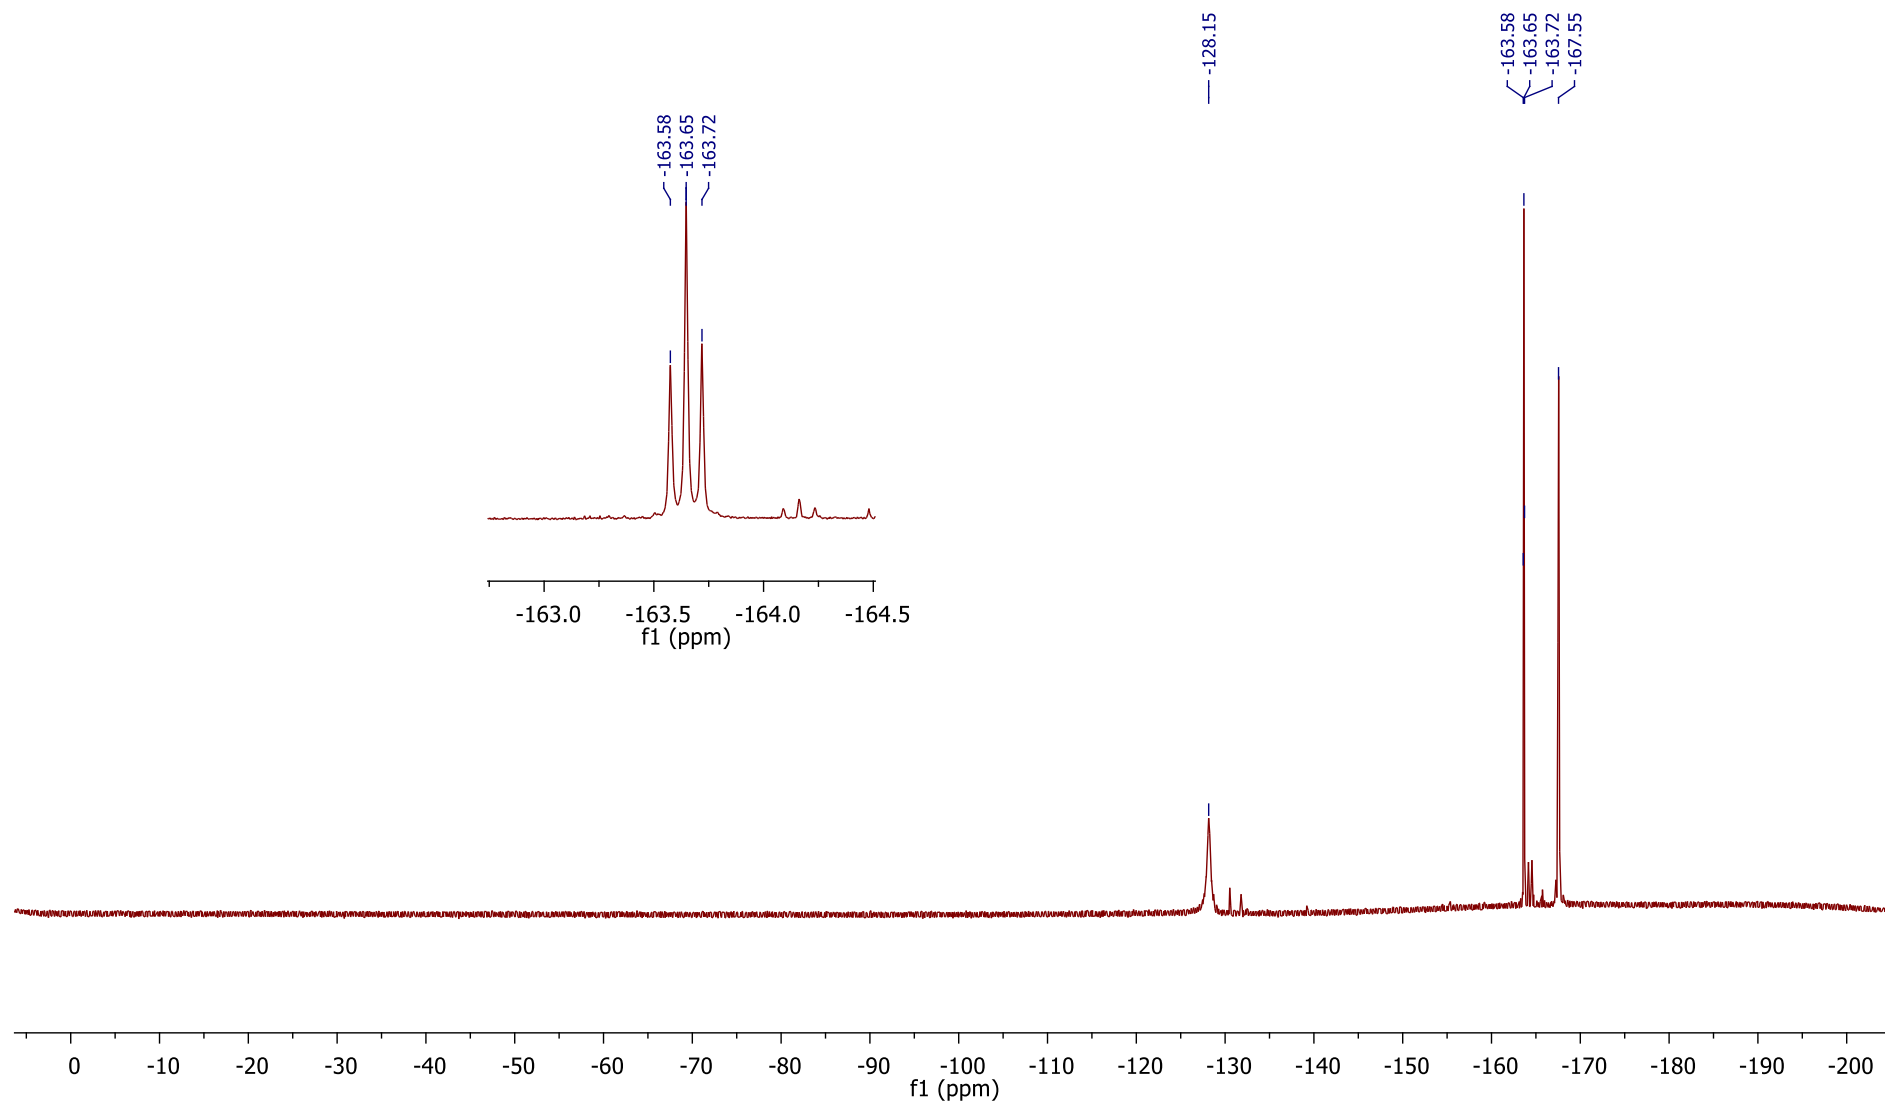

**Figure S19.**  $^{19}\text{F}$  NMR spectrum (283 MHz,  $\text{THF-}d_8$ , 298K) of  $[(\text{WCA-IDipp})\text{O}]\text{Li}\cdot 3\text{THF}$  (**6** $\cdot$ 3THF).



S2.3 [(WCA-IDipp)S]Li·5THF (7·5THF)

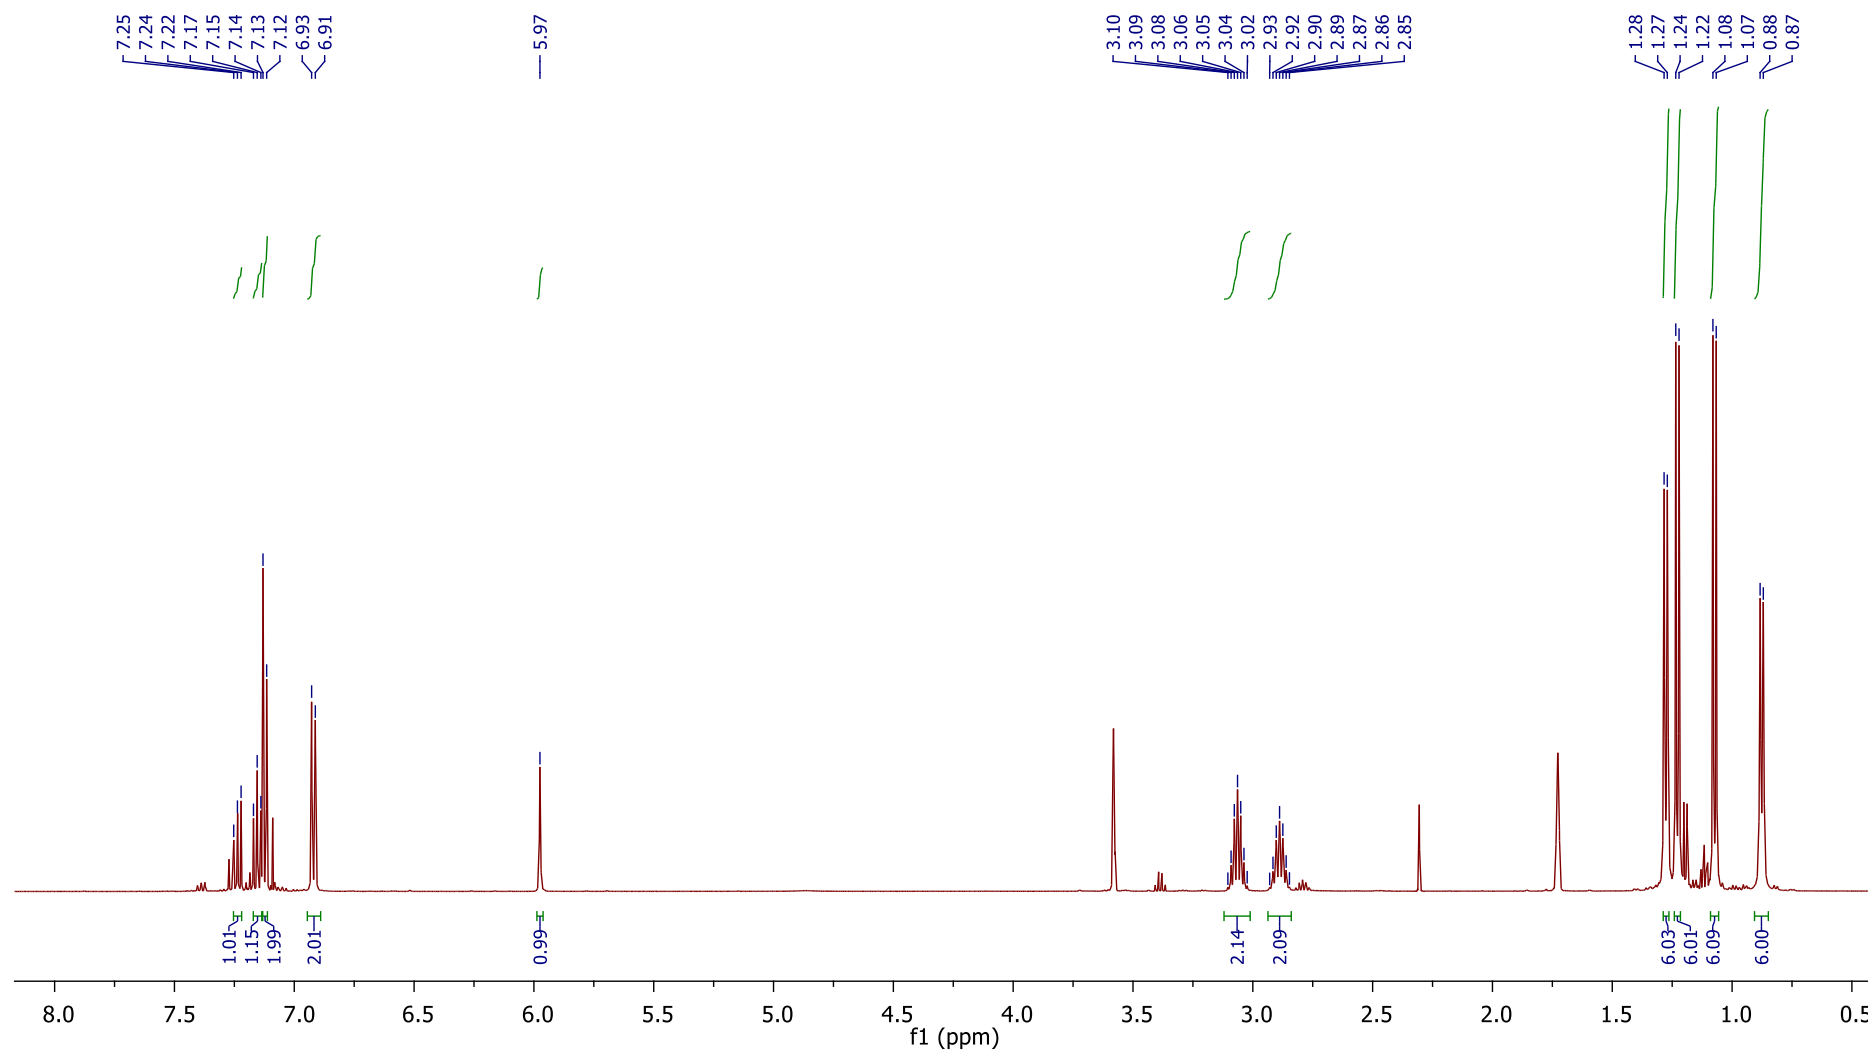

Figure S 20.  $^1\text{H}$  NMR spectrum (500 MHz, THF- $d_8$ , 298K) of [(WCA-IDipp)S]Li·5THF (7·5THF).

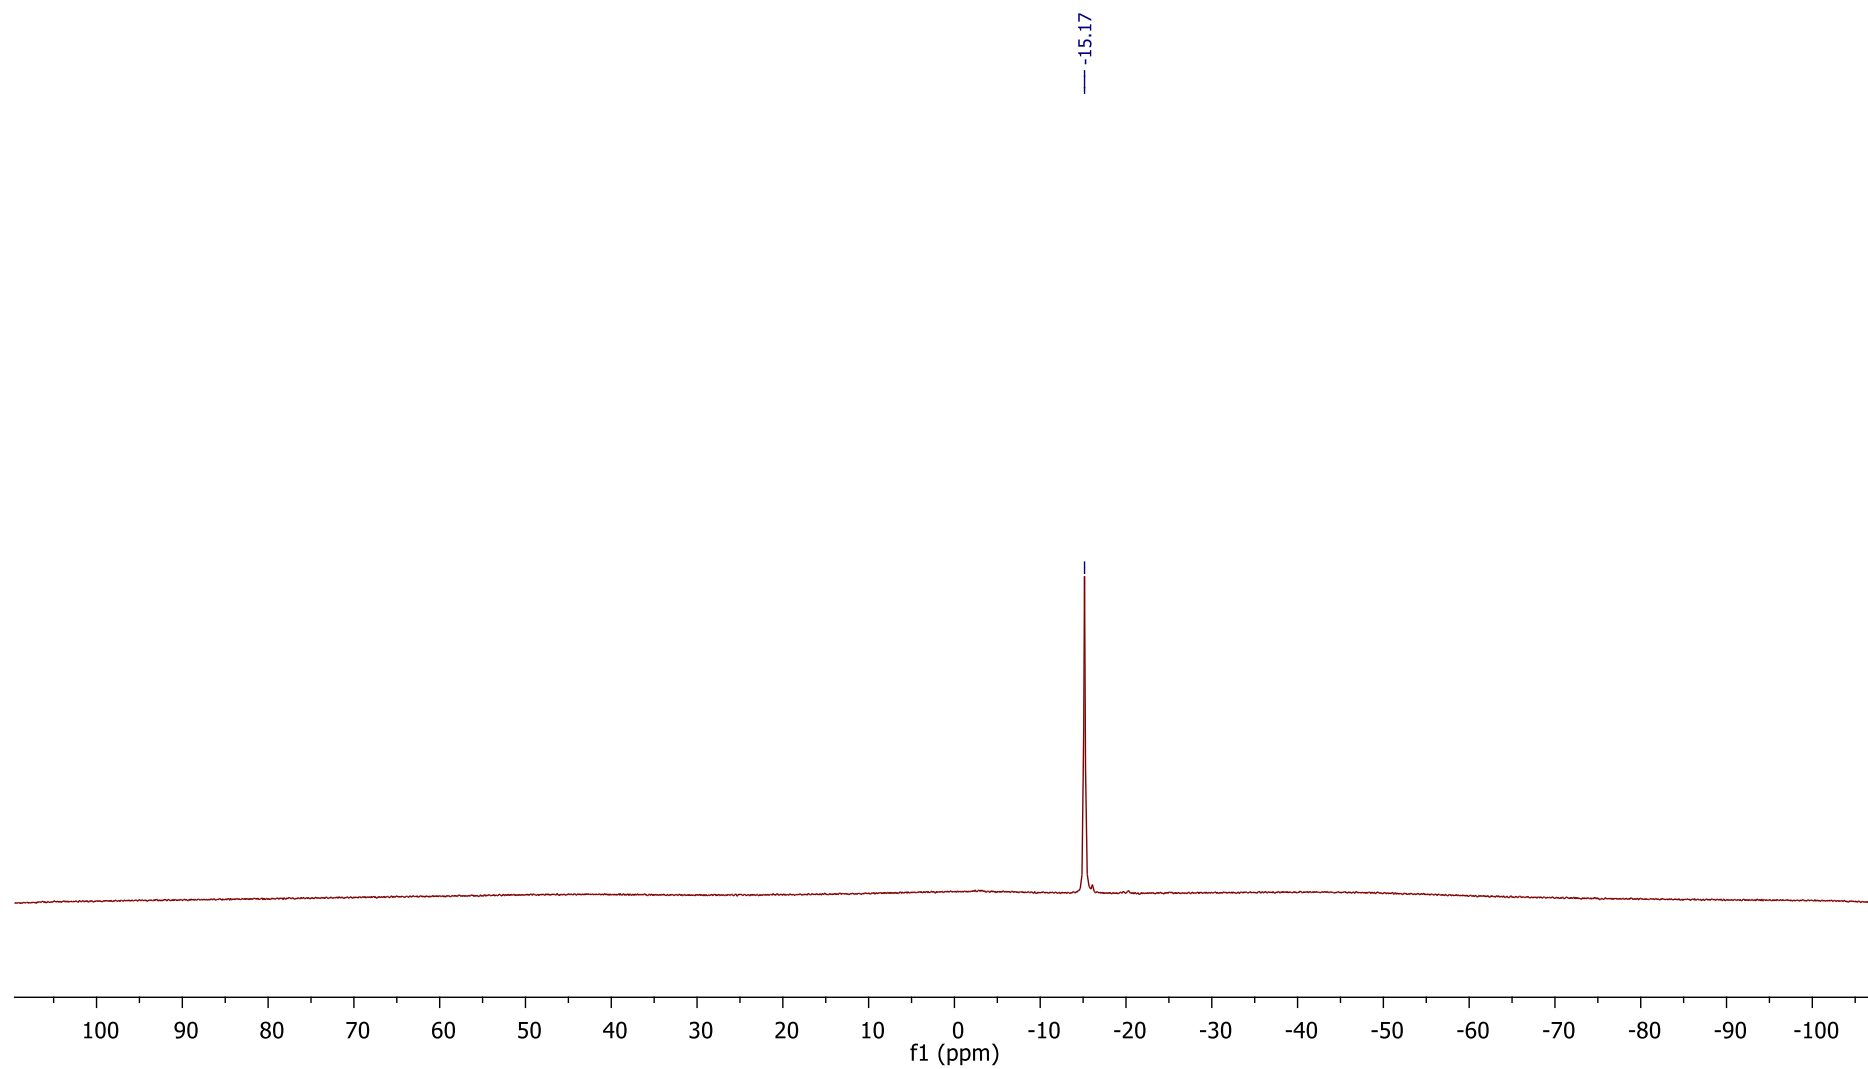

**Figure S 21.**  $^{11}\text{B}$  NMR spectrum (96 MHz,  $\text{THF-}d_8$ , 298K) of  $[(\text{WCA-IDipp})\text{S}]\text{Li}\cdot 5\text{THF}$  (**7** $\cdot 5\text{THF}$ ).

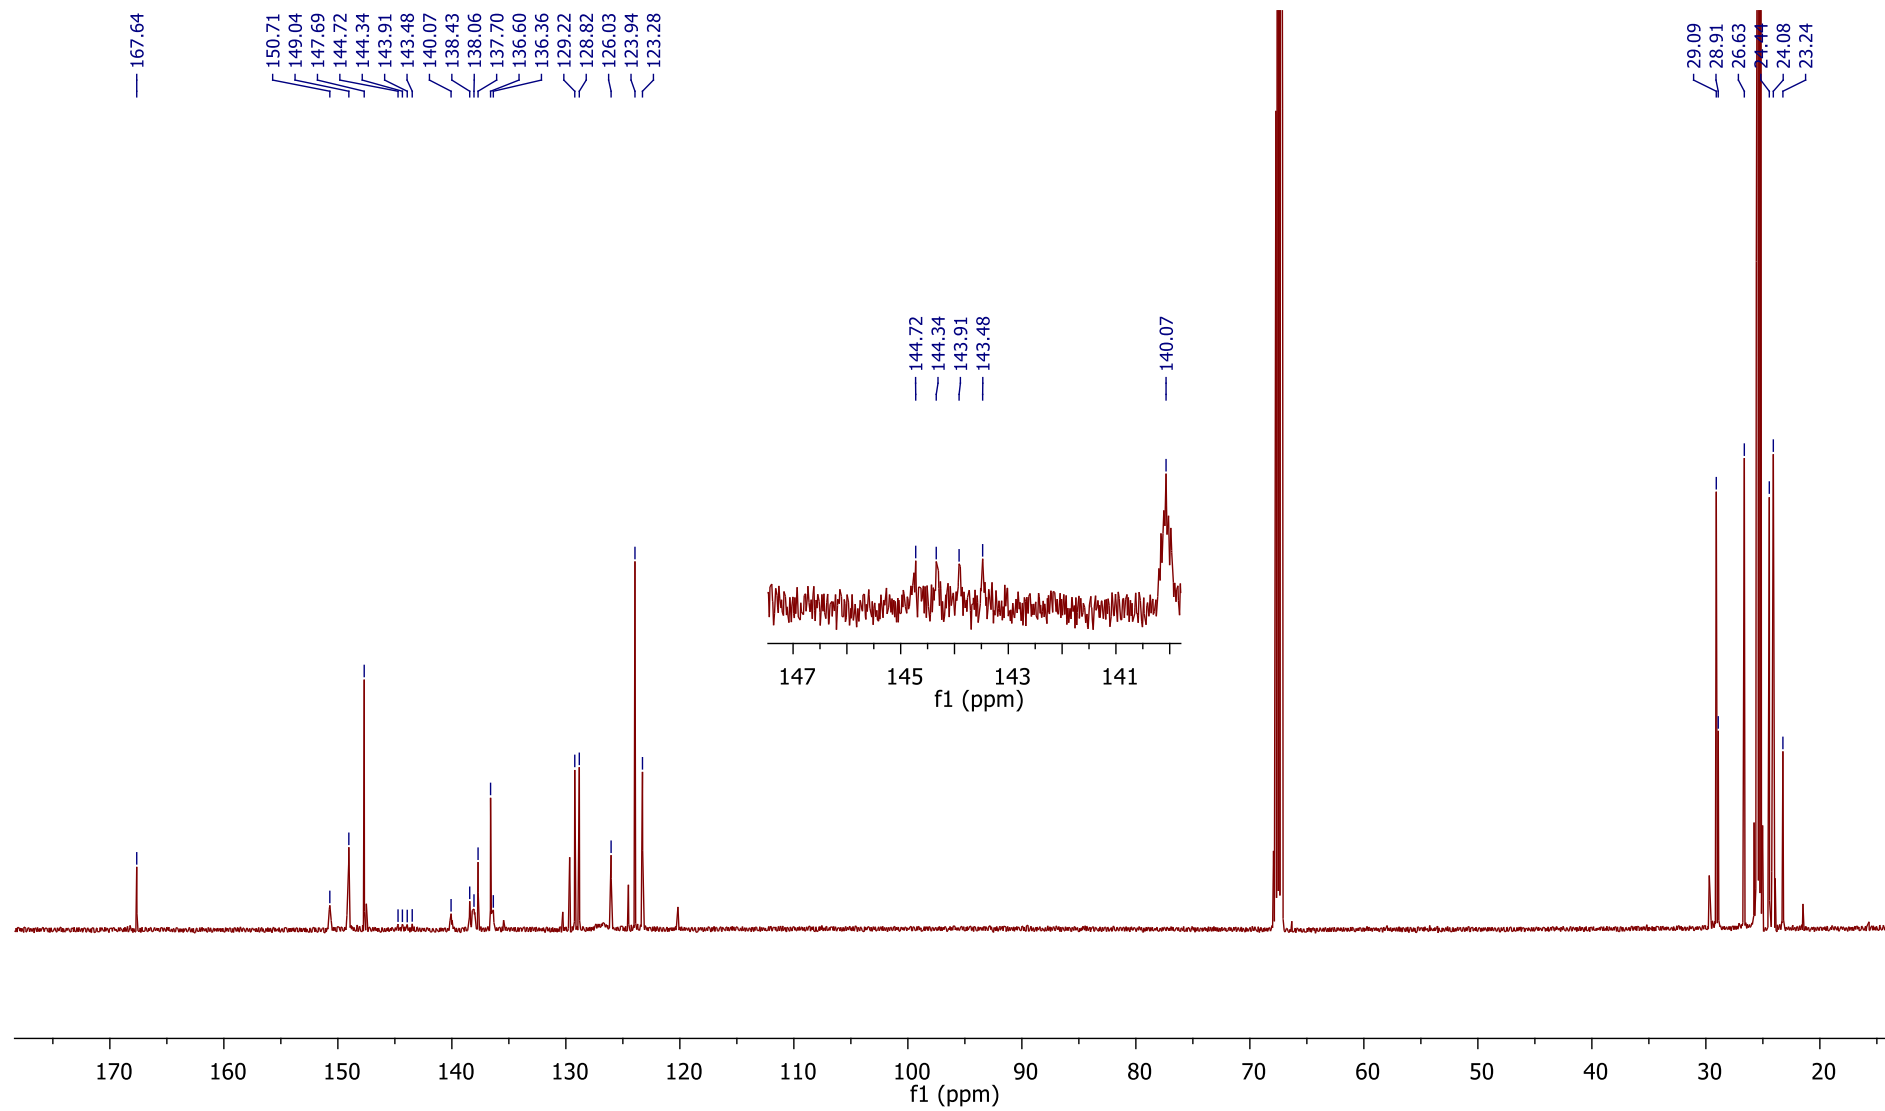

Figure S 22.  $^{13}\text{C}$  NMR spectrum (151 MHz,  $\text{THF-}d_8$ , 298K) of  $[(\text{WCA-IDipp})\text{S}]\text{Li-5THF}$  (7:5THF).

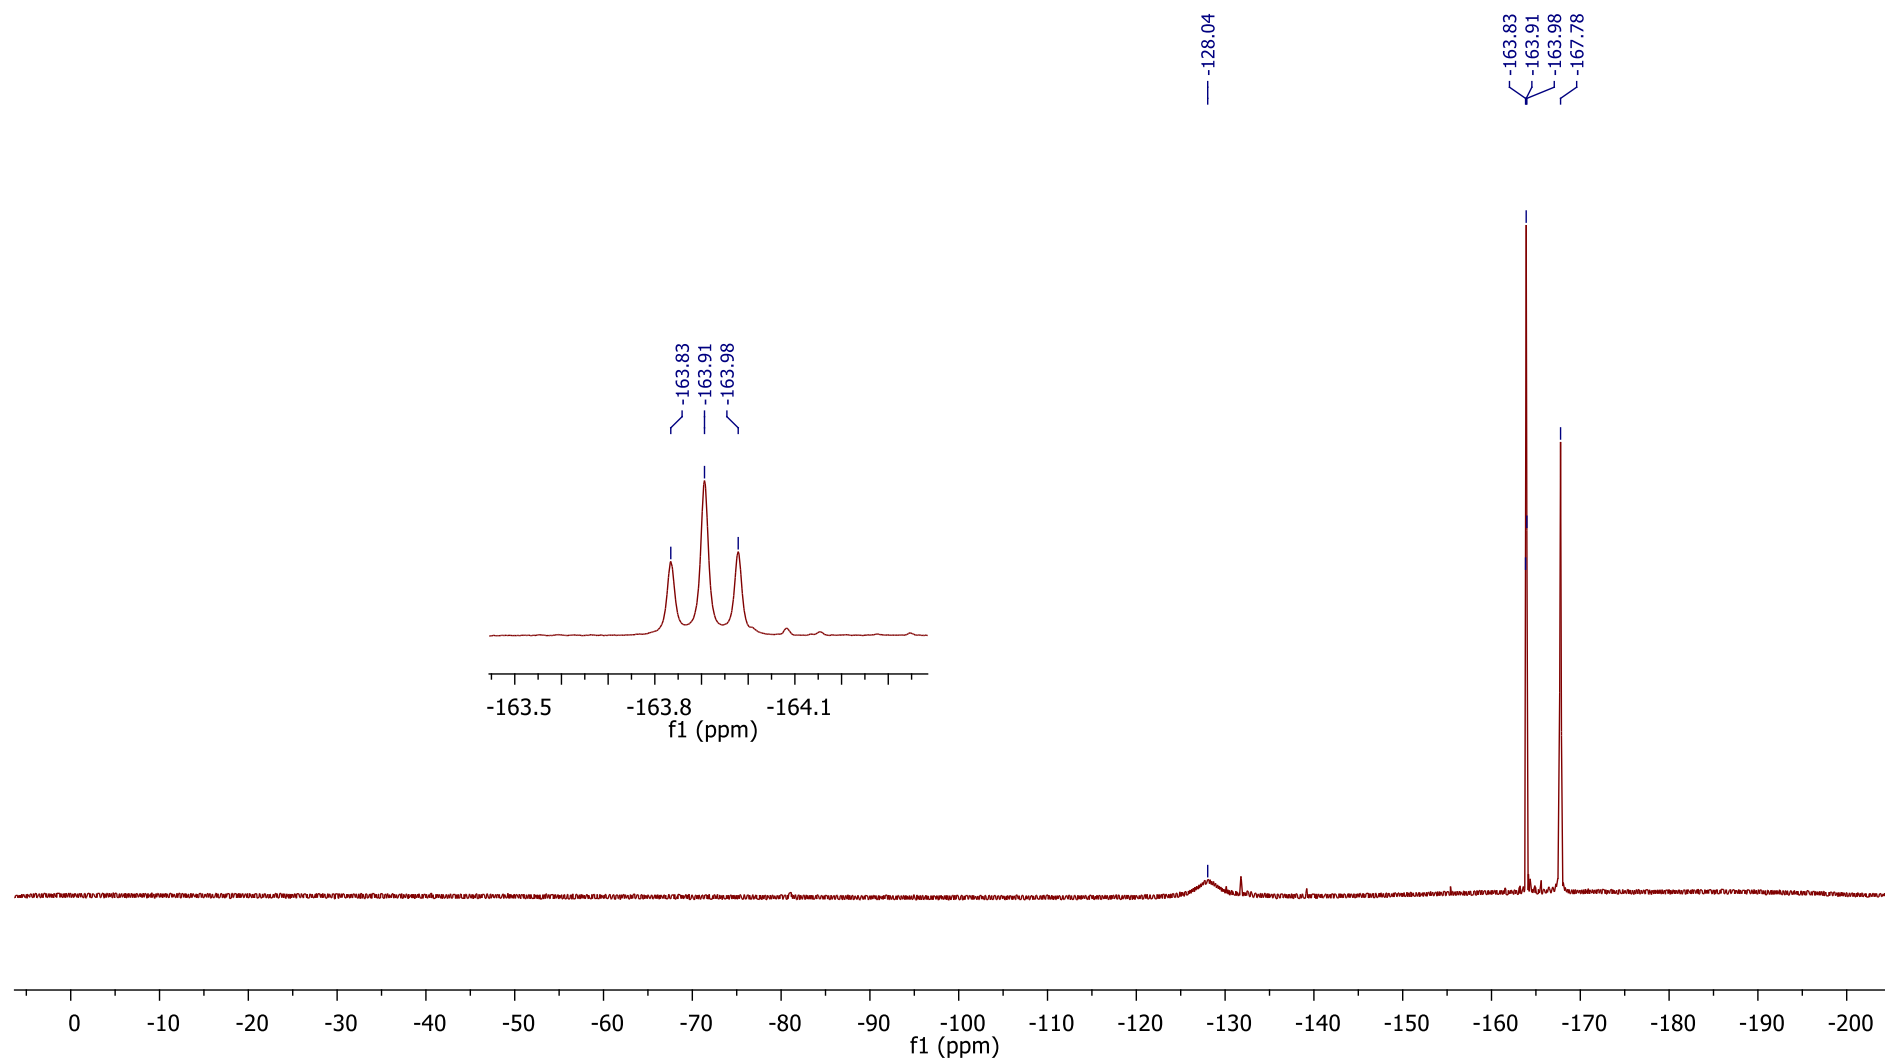

Figure S 23.  $^{19}\text{F}$  NMR spectrum (283 MHz,  $\text{THF-}d_8$ , 298K) of  $[(\text{WCA-IDipp})\text{S}]\text{Li}\cdot 5\text{THF}$  (7·5THF).

S2.4 [(WCA-IDipp)Se]Li·3Et<sub>2</sub>O (8·3Et<sub>2</sub>O)

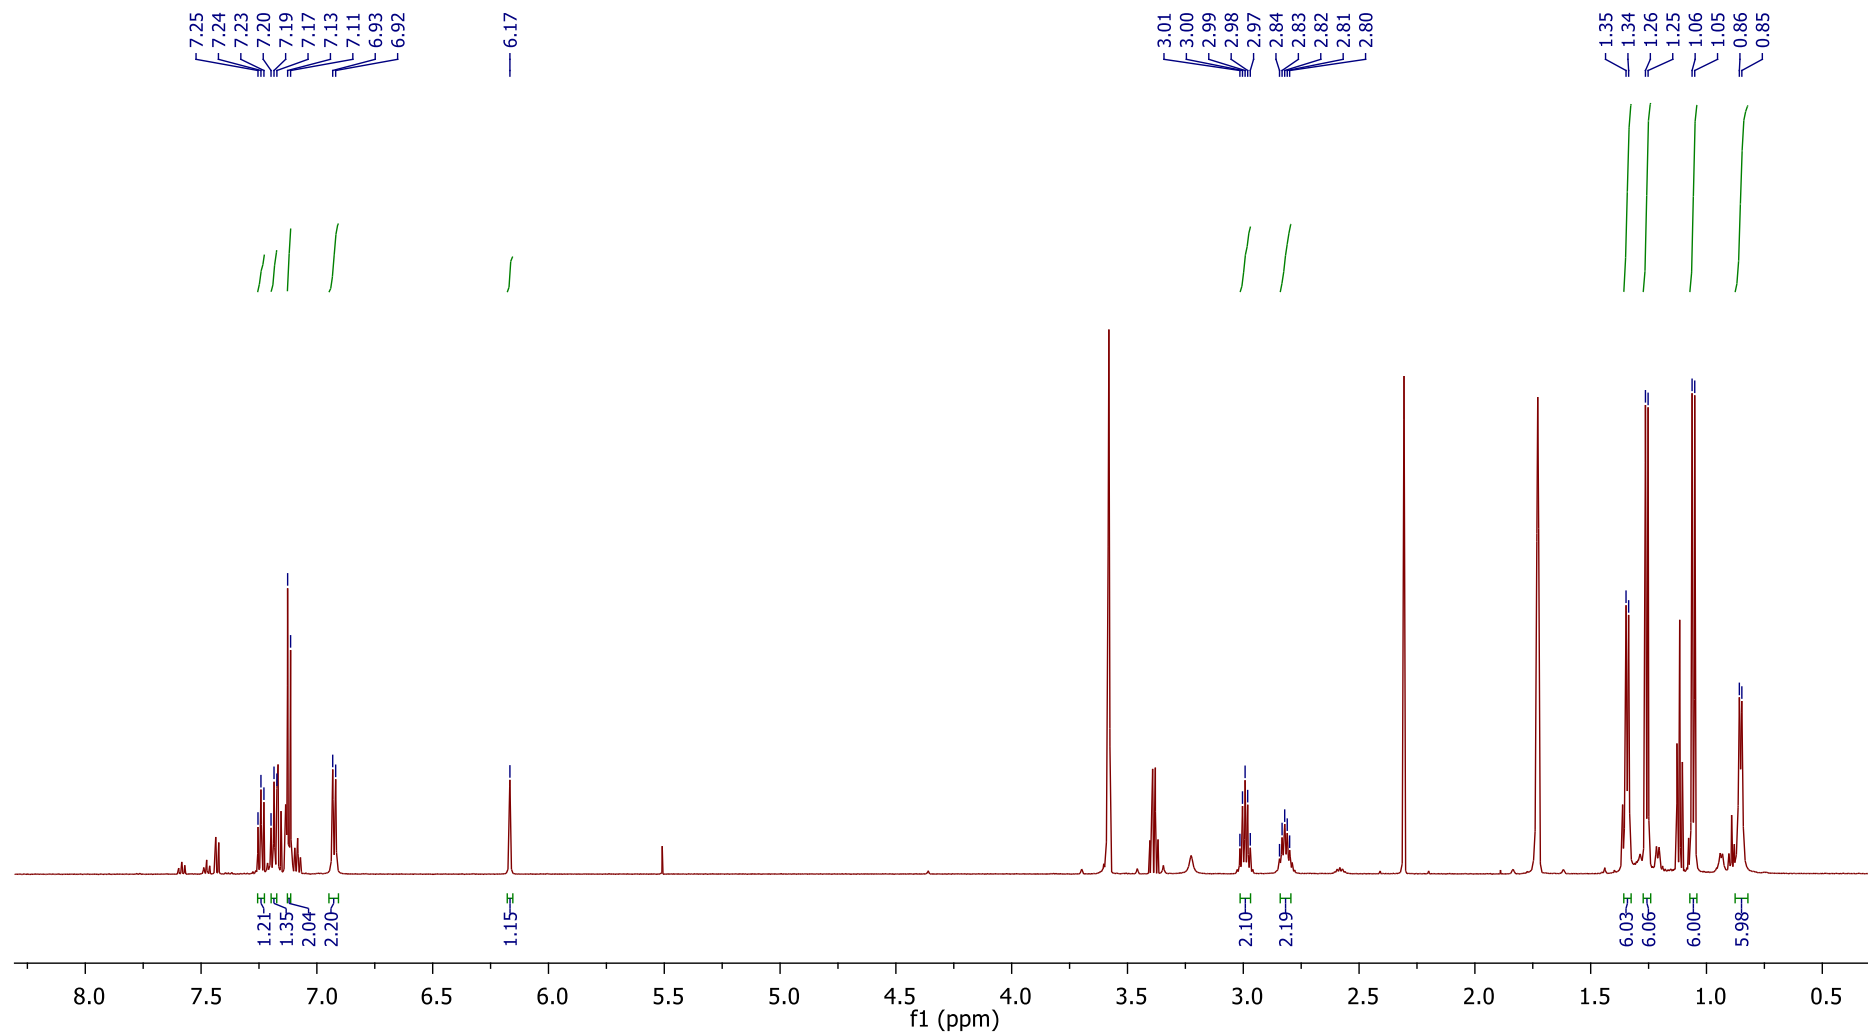

Figure S 24. <sup>1</sup>H NMR spectrum (600 MHz, THF-*d*<sub>8</sub>, 298K) of [(WCA-IDipp)Se]Li·3Et<sub>2</sub>O (8·3Et<sub>2</sub>O).

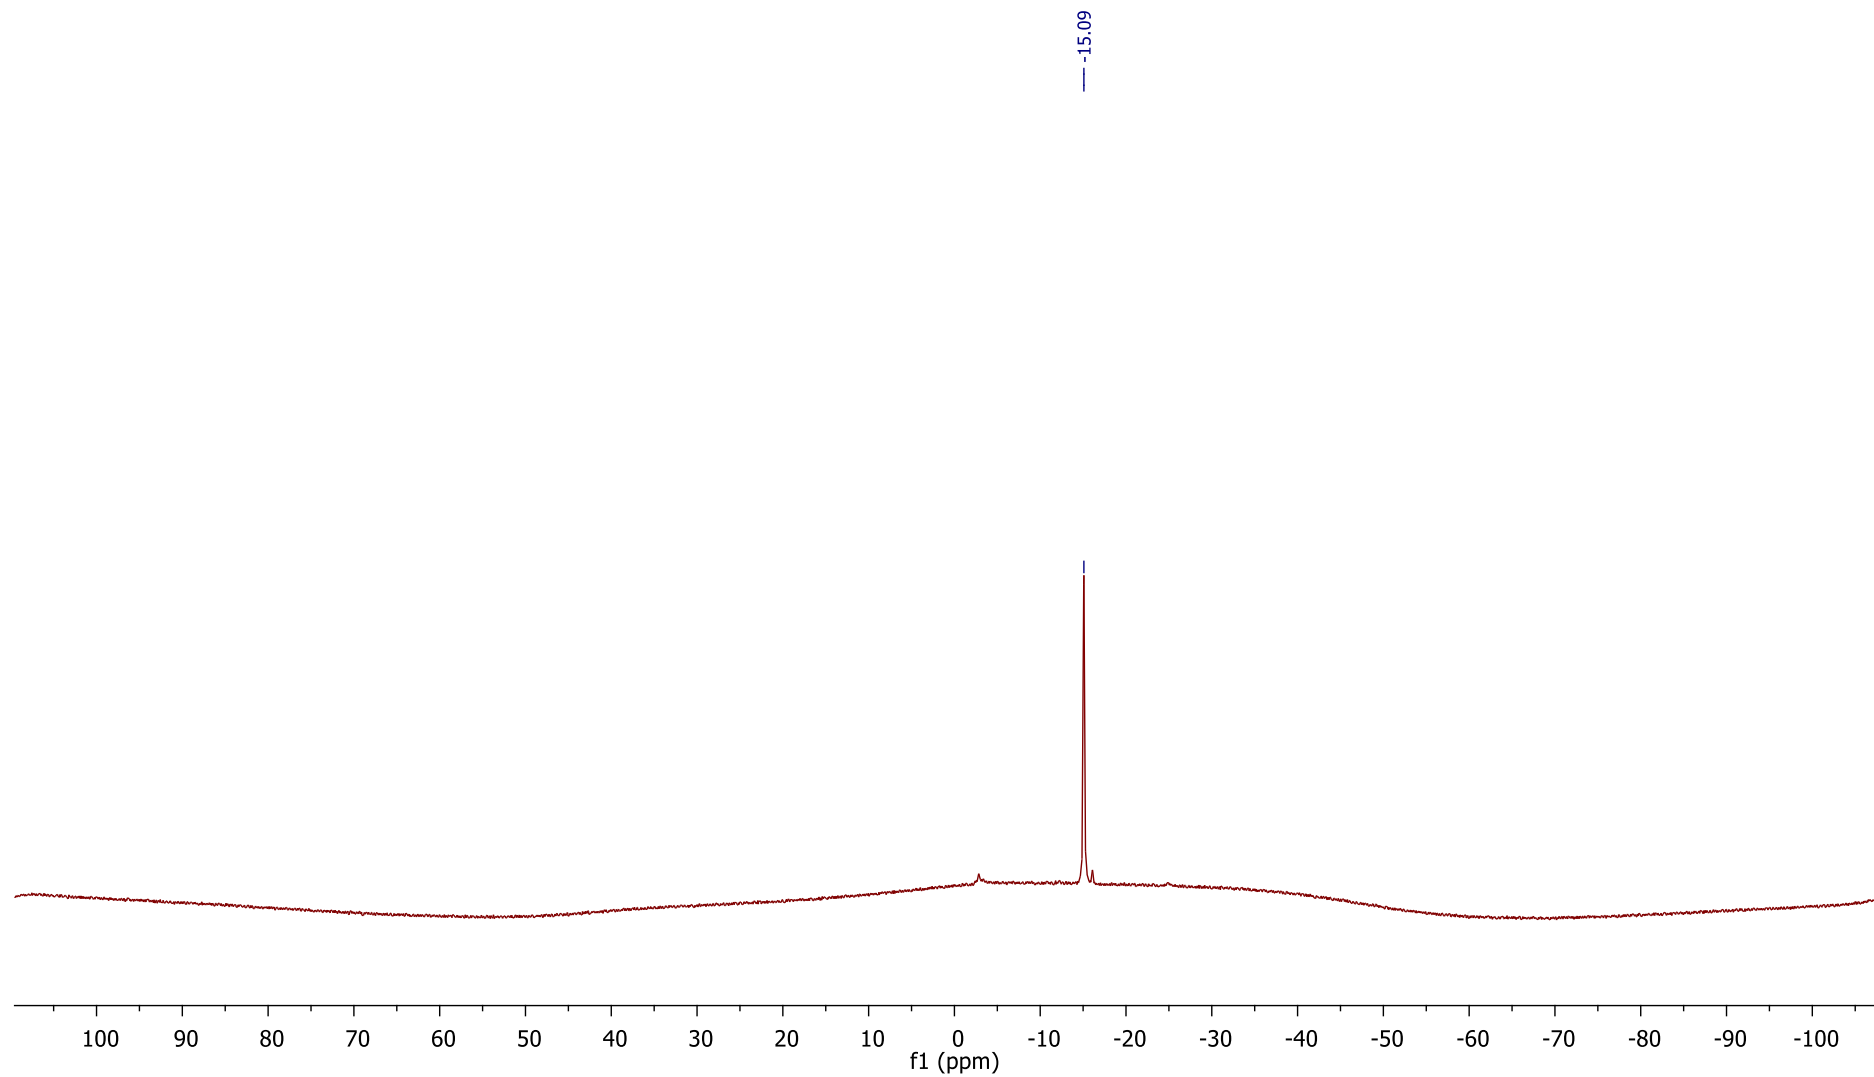

Figure S 25.  $^{11}\text{B}$  NMR spectrum (96 MHz,  $\text{THF-}d_8$ , 298K) of  $[(\text{WCA-IDipp})\text{Se}]\text{Li}\cdot 3\text{Et}_2\text{O}$  (**8** $\cdot 3\text{Et}_2\text{O}$ ).

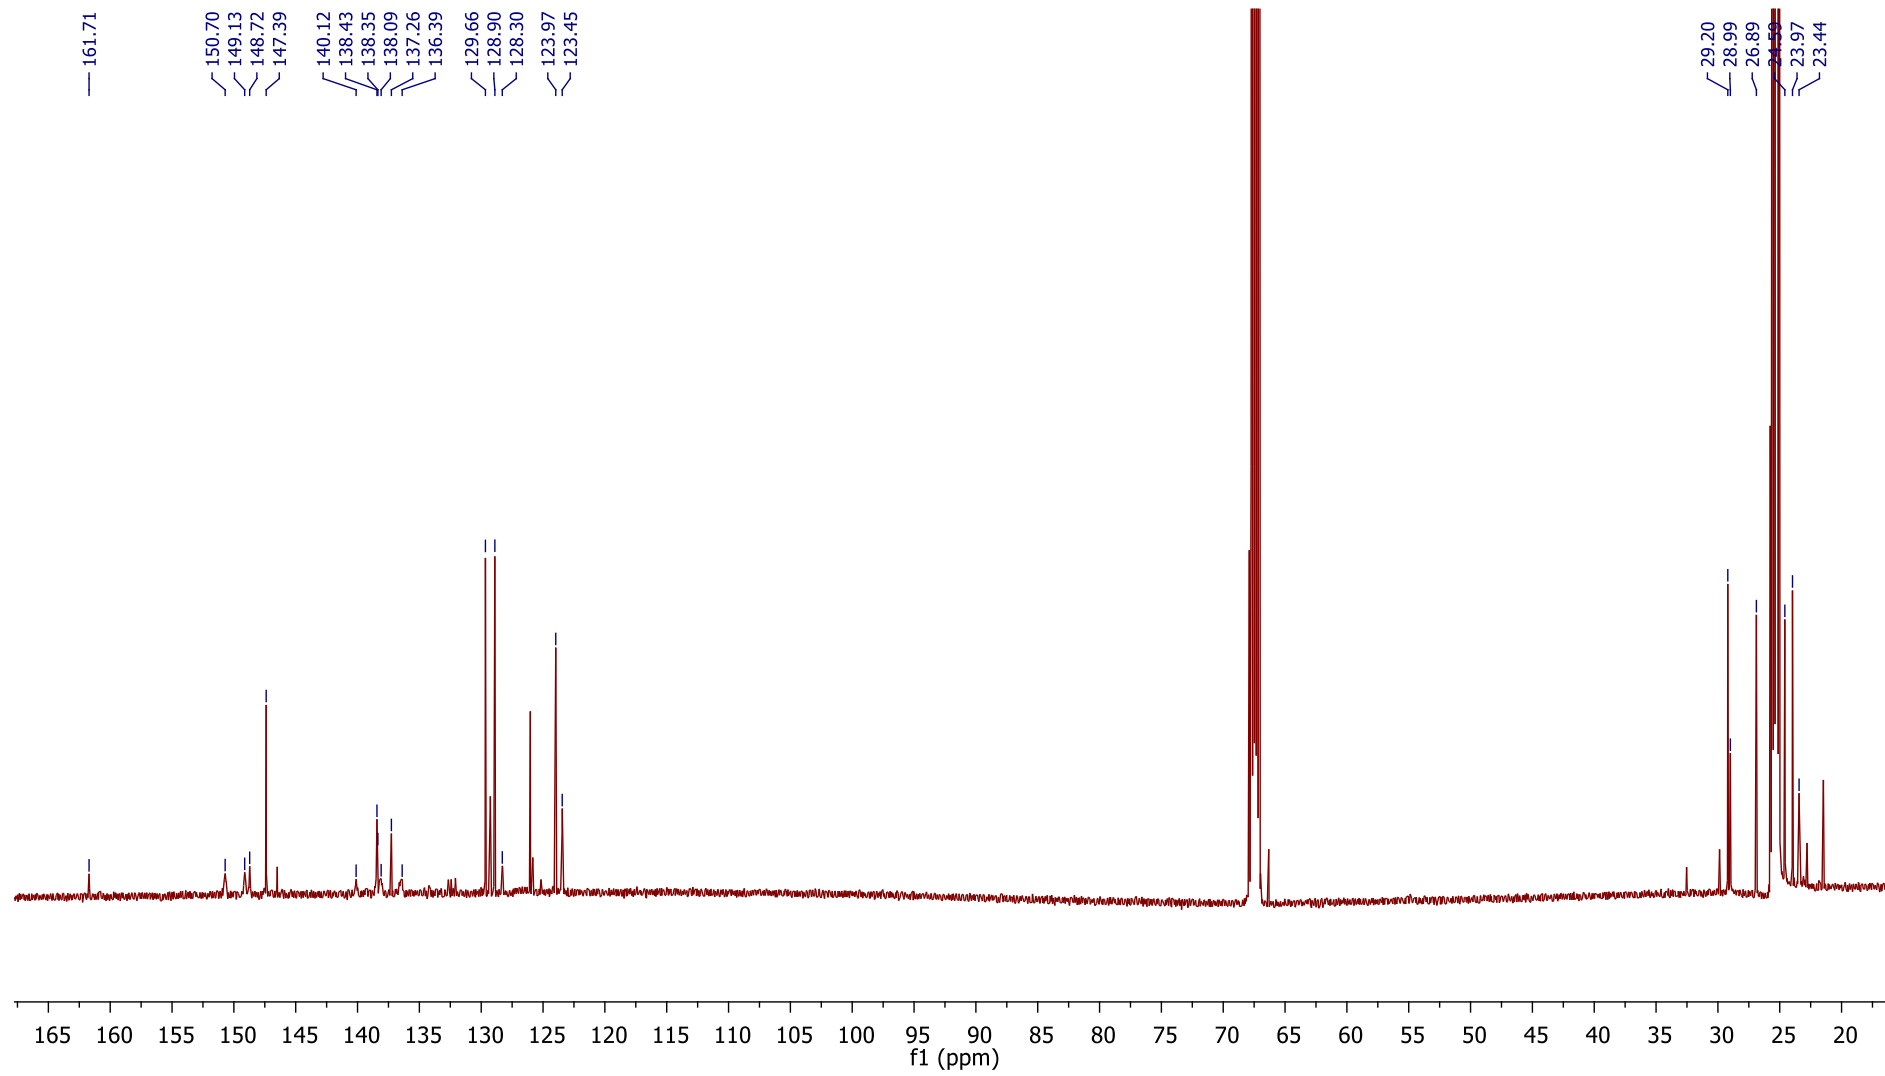

Figure S 26.  $^{13}\text{C}$  NMR spectrum (151 MHz,  $\text{THF-}d_8$ , 298K) of  $[(\text{WCA-IDipp})\text{Se}]\text{Li}\cdot 3\text{Et}_2\text{O}$  (**8** $\cdot 3\text{Et}_2\text{O}$ ).

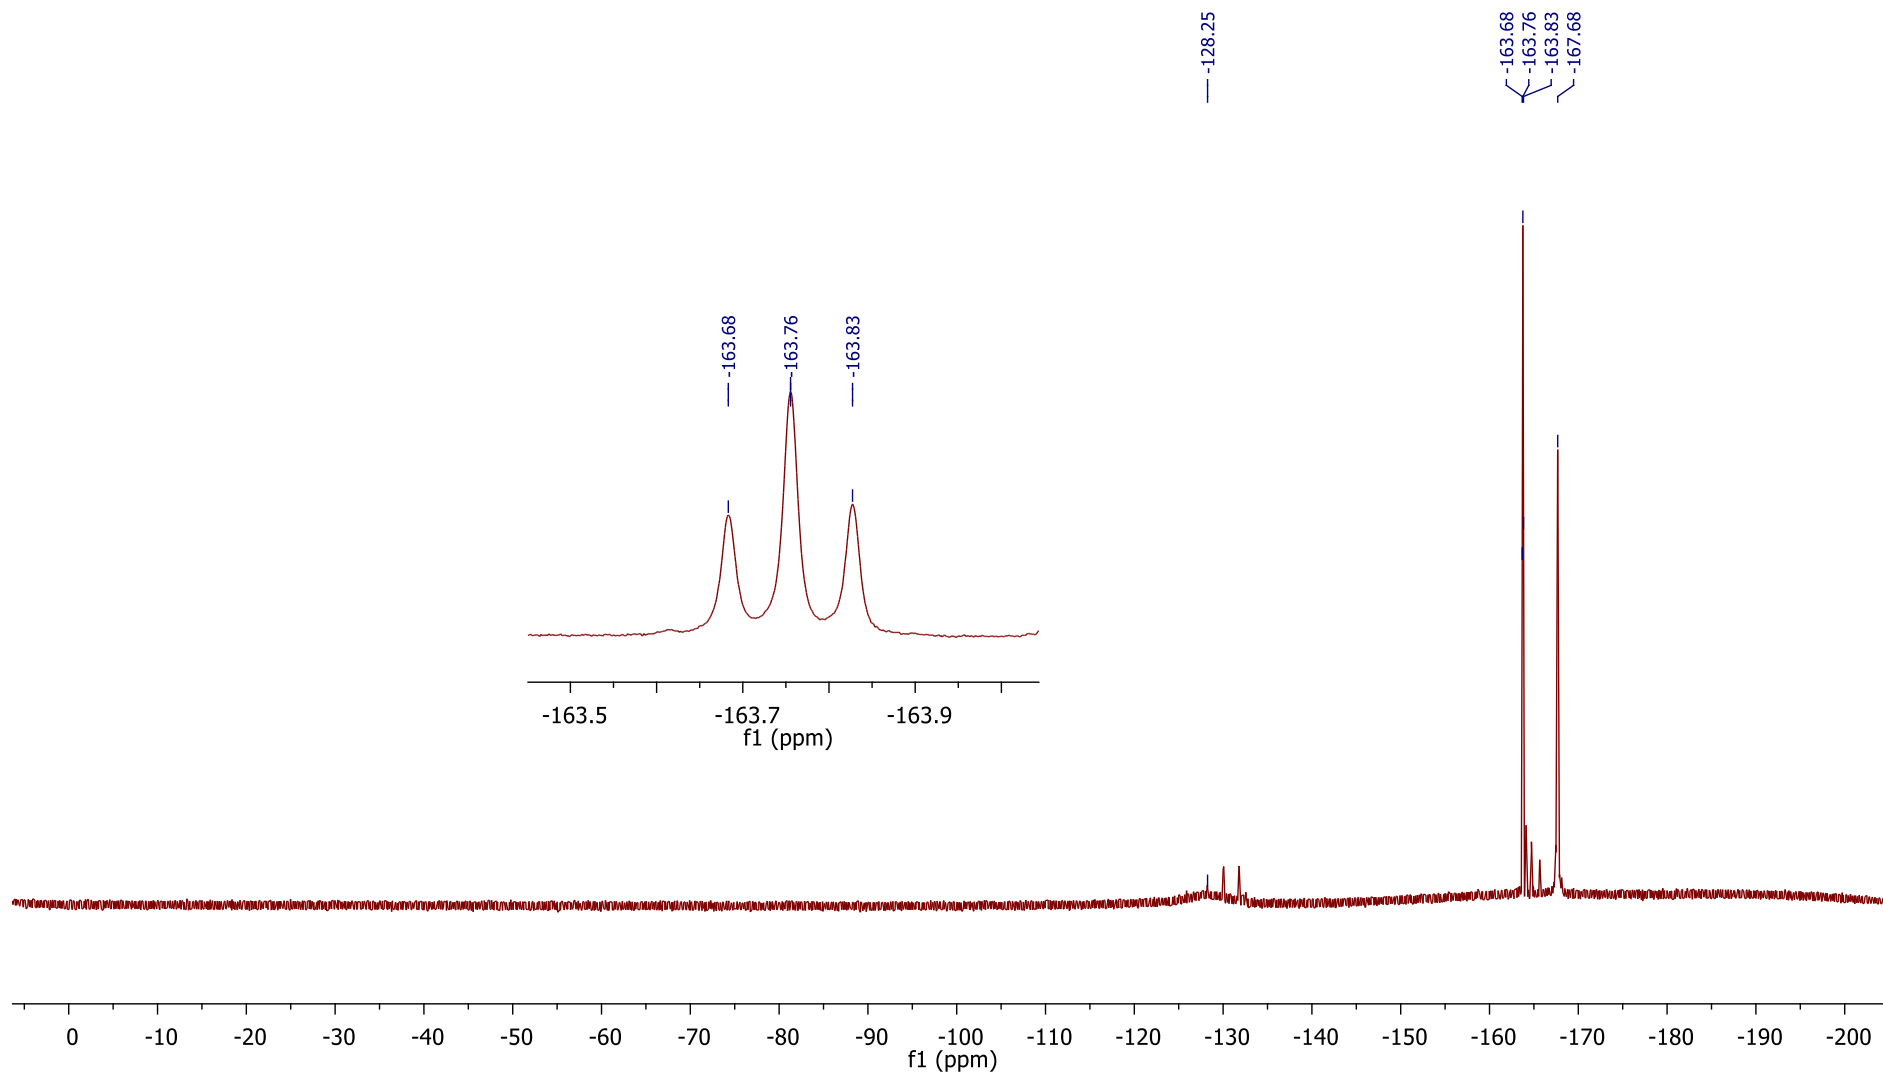

Figure S 27.  $^{19}\text{F}$  NMR spectrum (283 MHz,  $\text{THF-}d_8$ , 298K) of  $[(\text{WCA-IDipp})\text{Se}]\text{Li}\cdot 3\text{Et}_2\text{O}$  (**8** $\cdot 3\text{Et}_2\text{O}$ ).



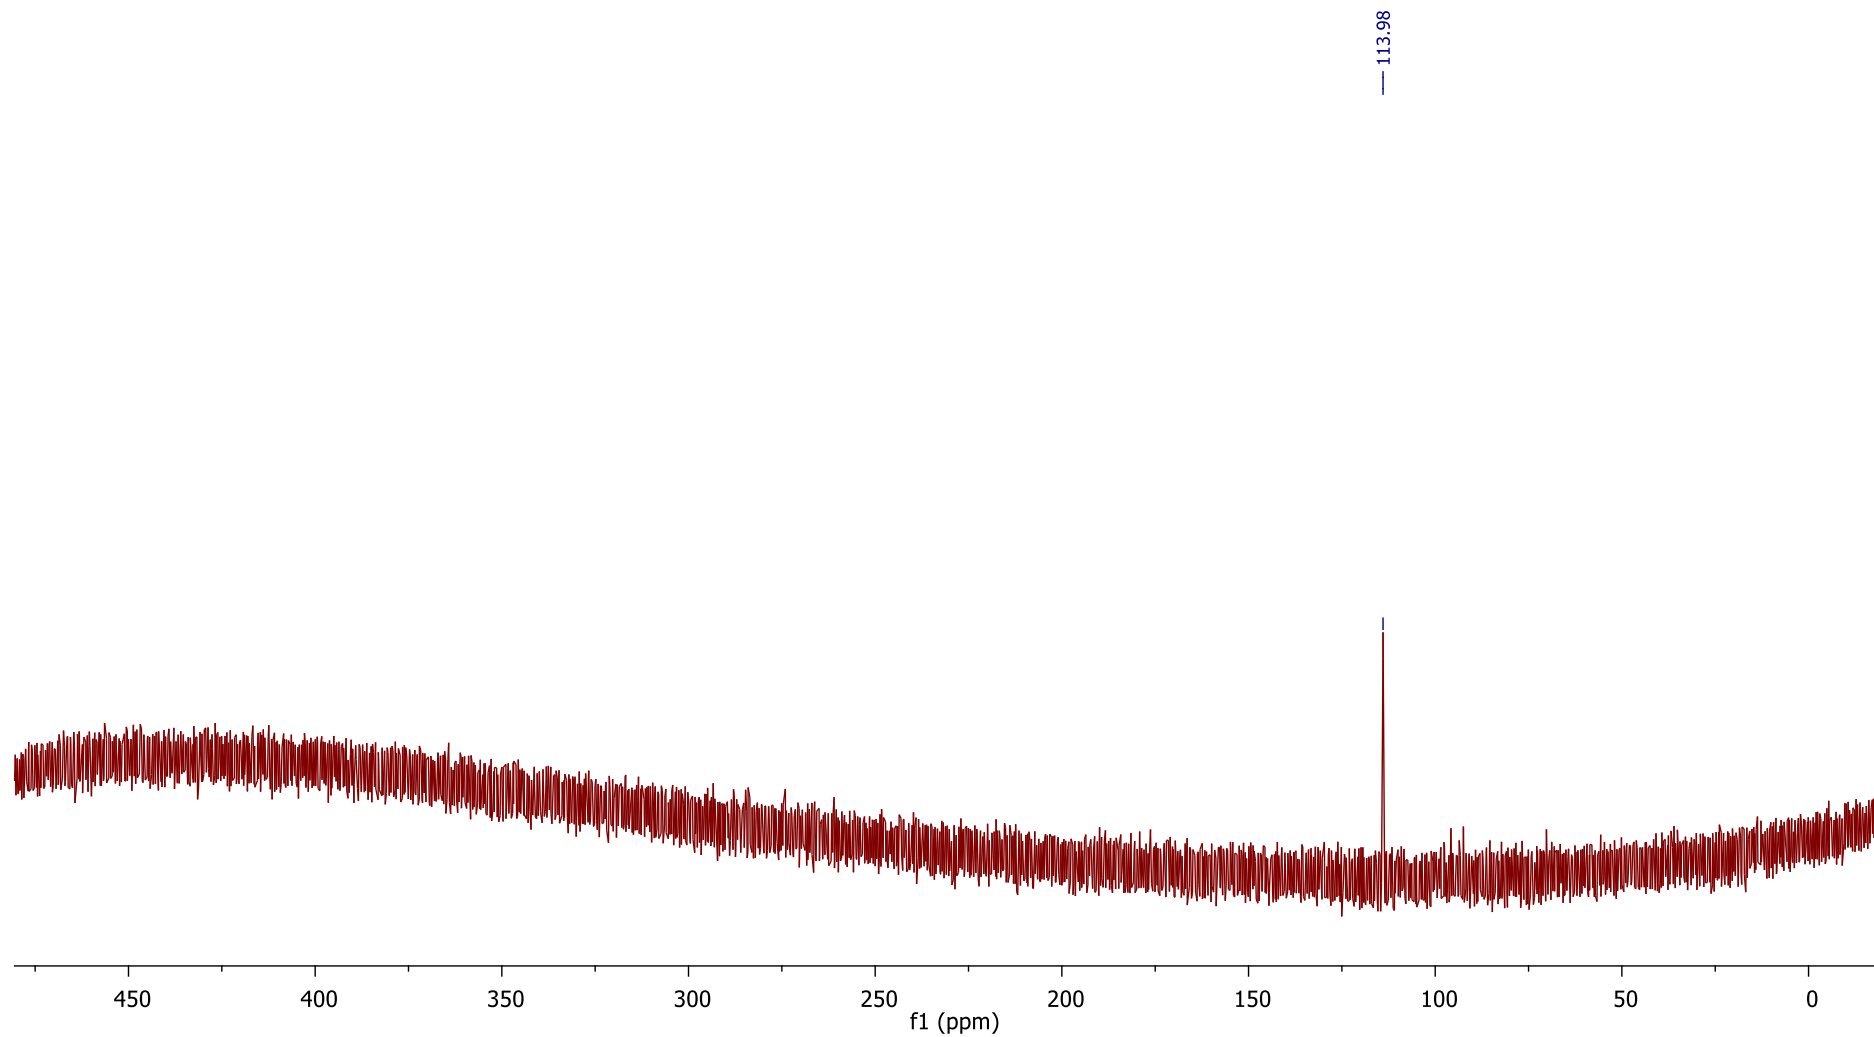

**Figure S 28.**  $^{77}\text{Se}$  NMR spectrum (76 MHz, THF- $d_8$ , 298 K) of  $[(\text{WCA-IDipp})\text{Se}]\text{Li}\cdot 3\text{Et}_2\text{O}$  (**8** $\cdot 3\text{Et}_2\text{O}$ ).

S2.5 [(WCA-IDipp)Te]Li·2Et<sub>2</sub>O·2THF (9·2Et<sub>2</sub>O·2THF)

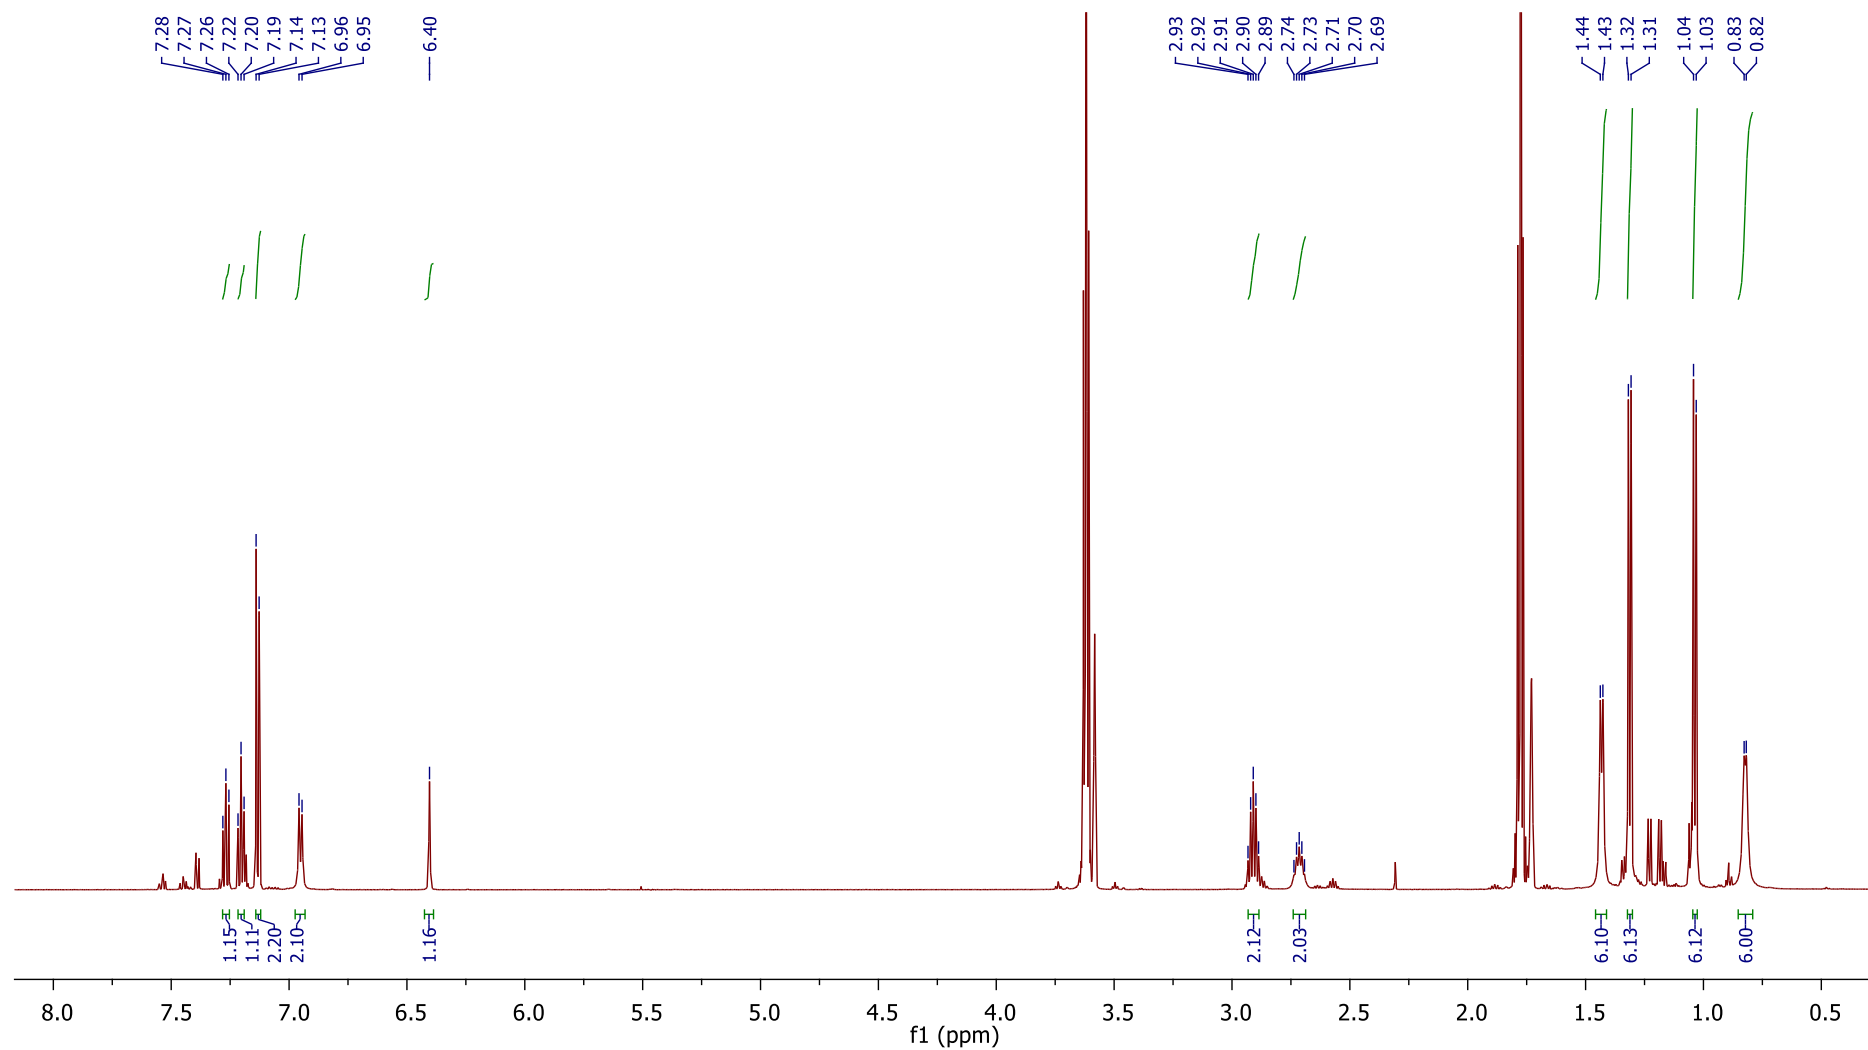

Figure S 29. <sup>1</sup>H NMR spectrum (600 MHz, THF-*d*<sub>8</sub>, 298K) of [(WCA-IDipp)Te]Li·2Et<sub>2</sub>O·2THF (9·2Et<sub>2</sub>O·2THF)

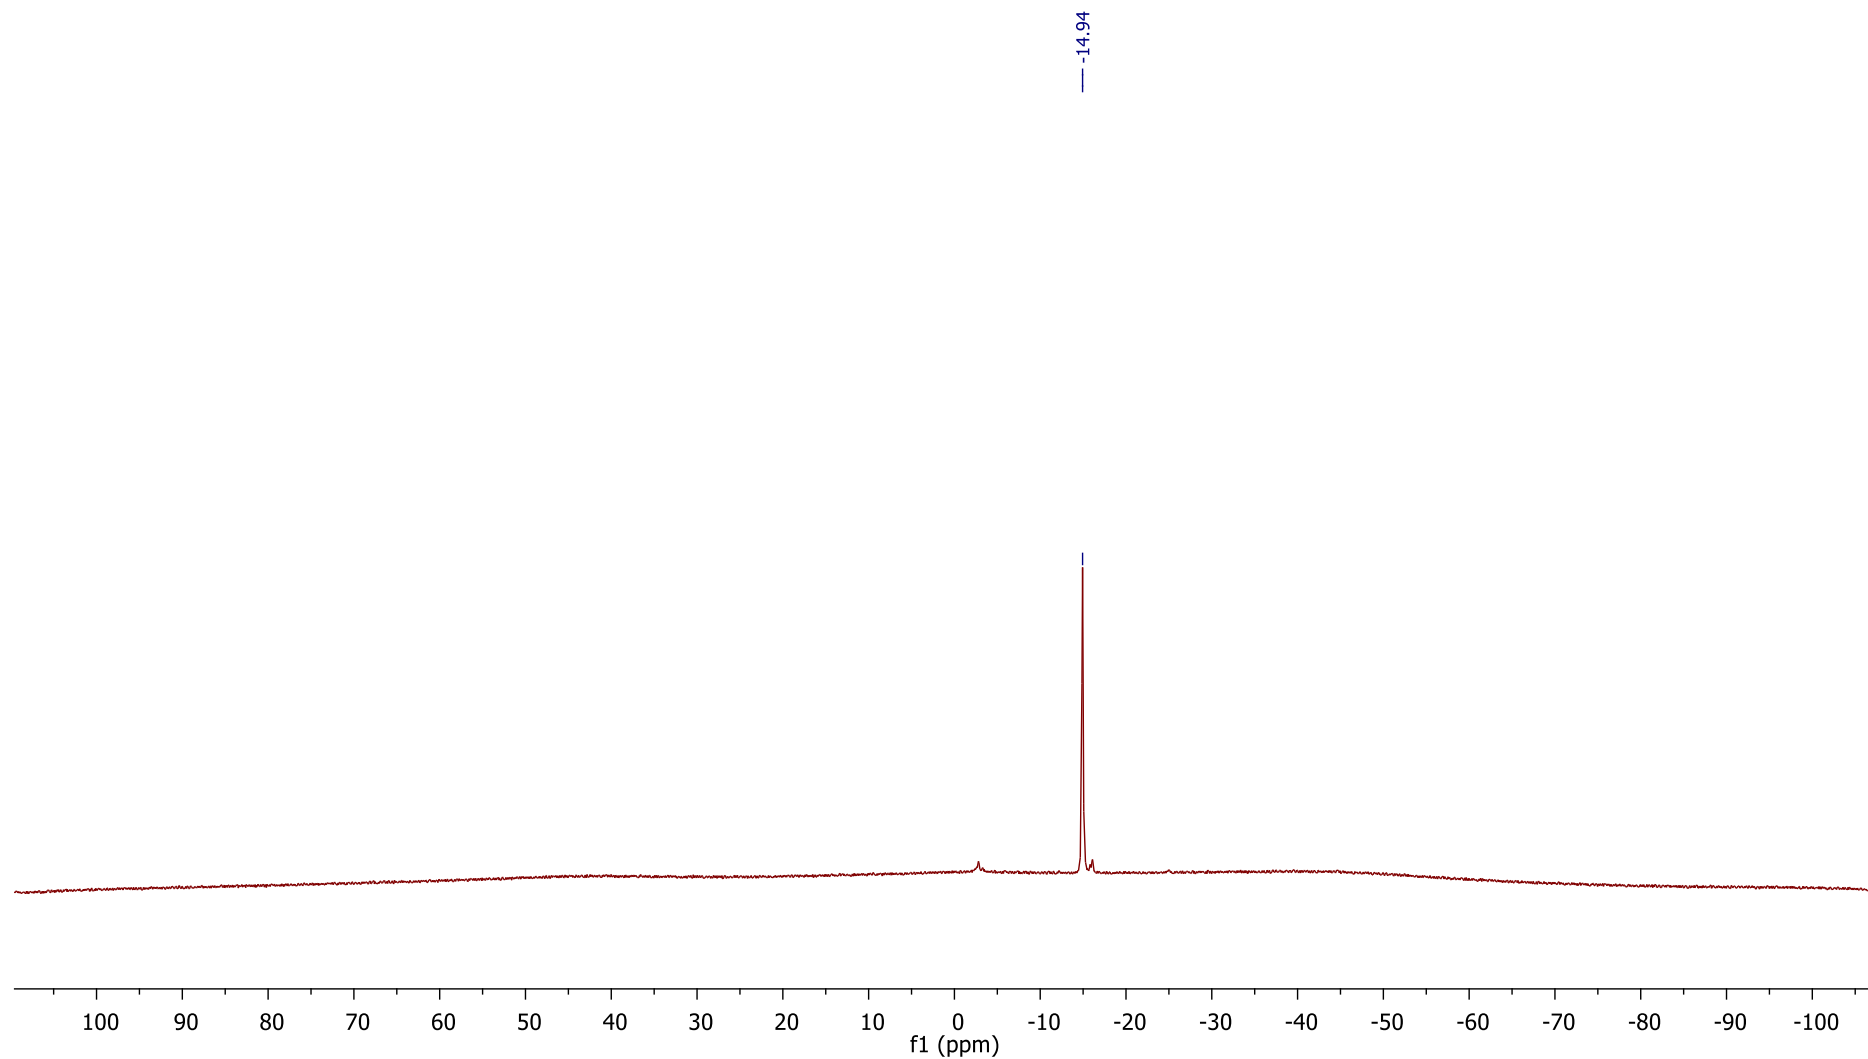

**Figure S 30.**  $^{11}\text{B}$  NMR spectrum (96 MHz,  $\text{THF-}d_8$ , 298K) of  $[(\text{WCA-IDipp})\text{Te}]\text{Li}\cdot 2\text{Et}_2\text{O}\cdot 2\text{THF}$  ( $9\cdot 2\text{Et}_2\text{O}\cdot 2\text{THF}$ )

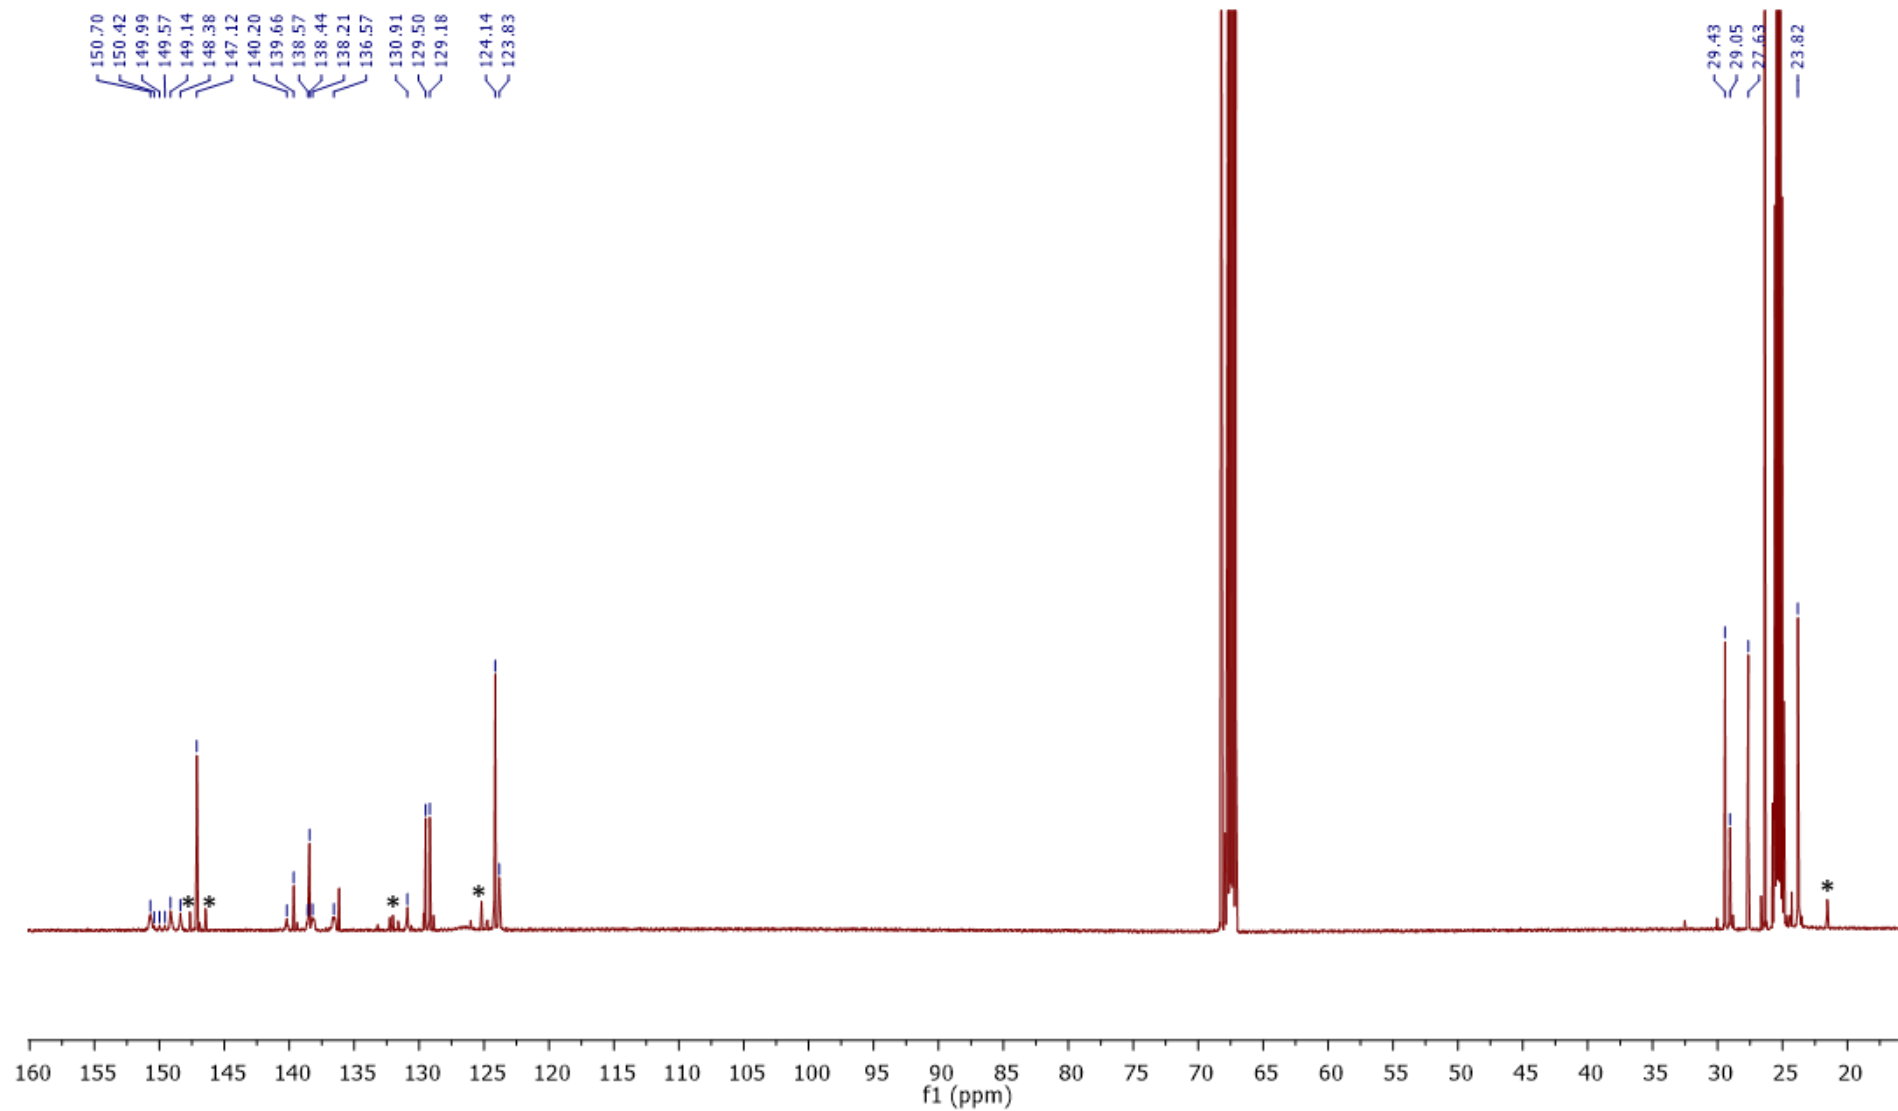

**Figure S 31.**  $^{13}\text{C}$  NMR spectrum (151 MHz,  $\text{THF-}d_8$ , 298K) of  $[(\text{WCA-IDipp})\text{Te}]\text{Li}\cdot 2\text{Et}_2\text{O}\cdot 2\text{THF}$  (**9** $\cdot 2\text{Et}_2\text{O}\cdot 2\text{THF}$ ). Signals marked with \* correspond to the decomposition product of **9**. **9** decomposes over time upon light exposure.

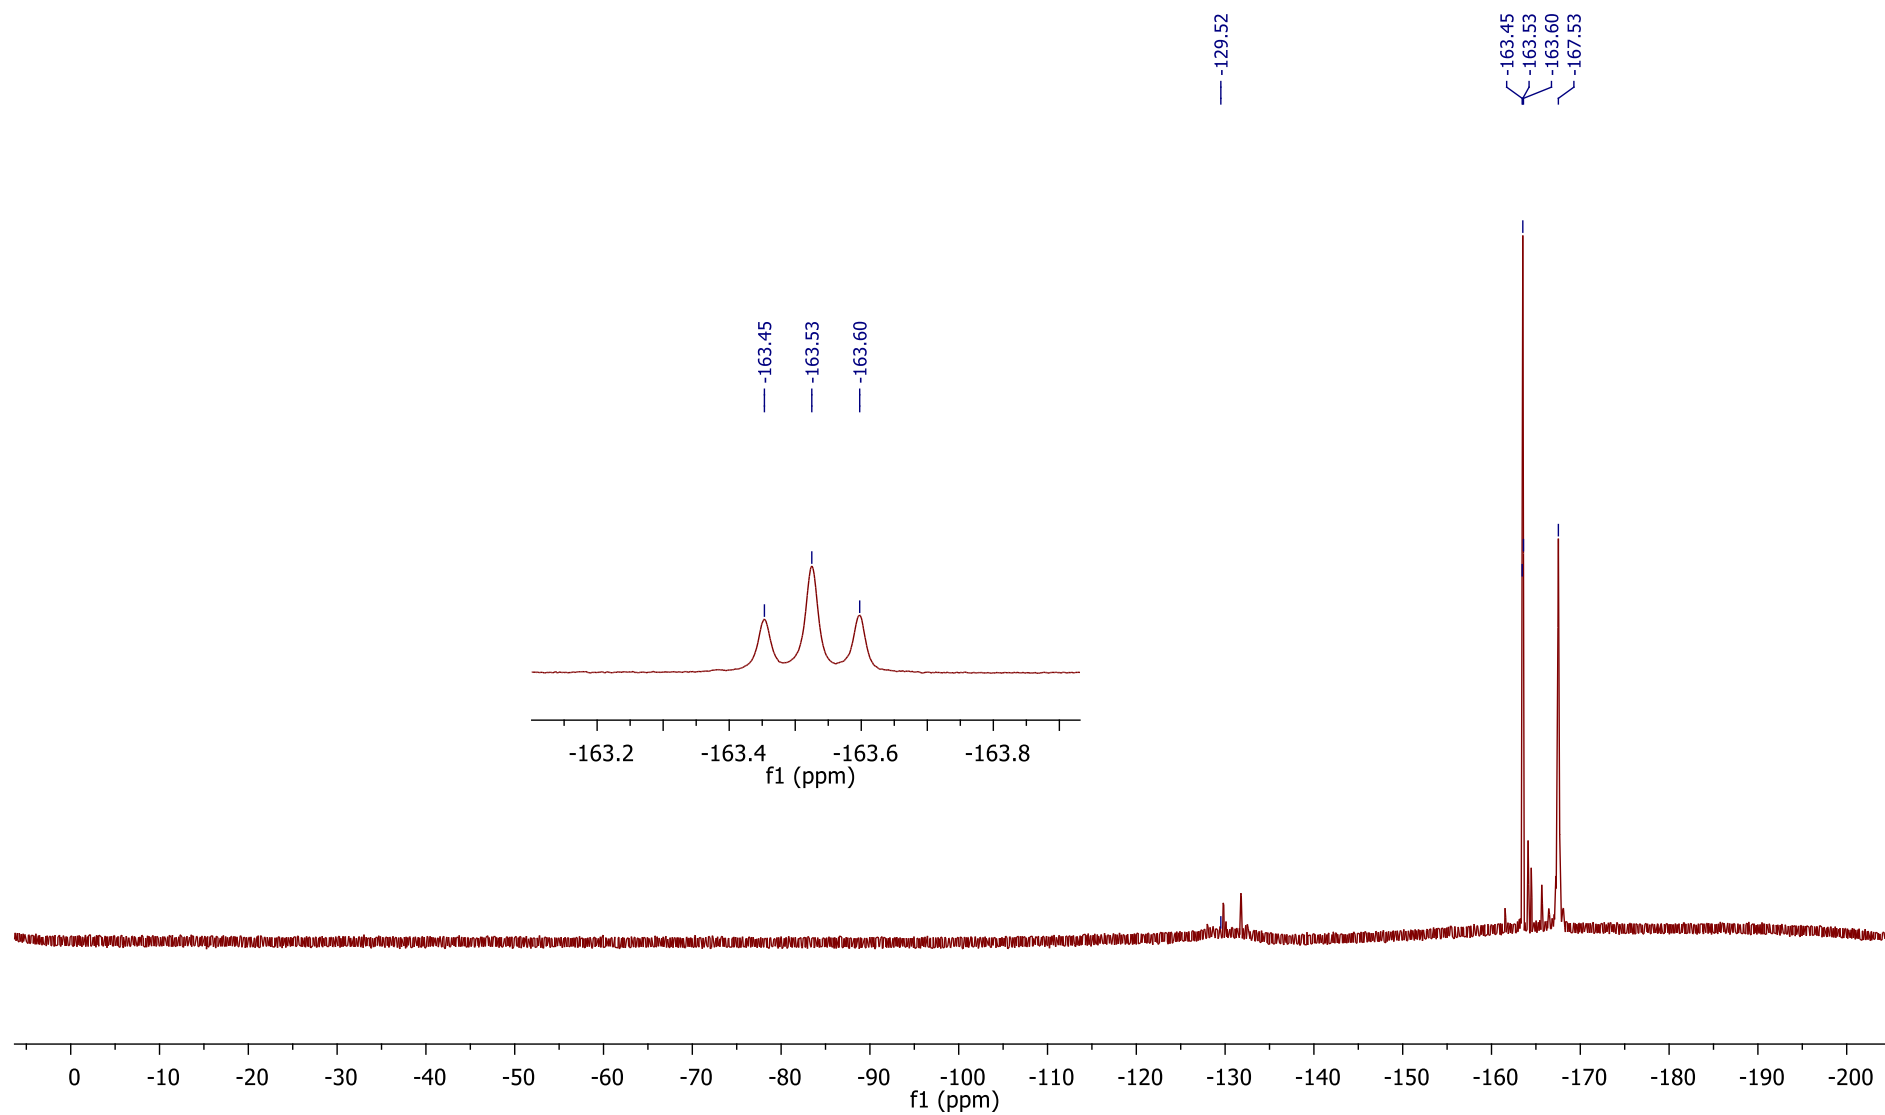

Figure S 32.  $^{19}\text{F}$  NMR spectrum (283 MHz,  $\text{THF-}d_8$ , 298K) of  $[(\text{WCA-IDipp})\text{Te}]\text{Li}\cdot 2\text{Et}_2\text{O}\cdot 2\text{THF}$  (9·2Et<sub>2</sub>O·2THF)

S2.6 (WCA-IDipp)OH (**10**)

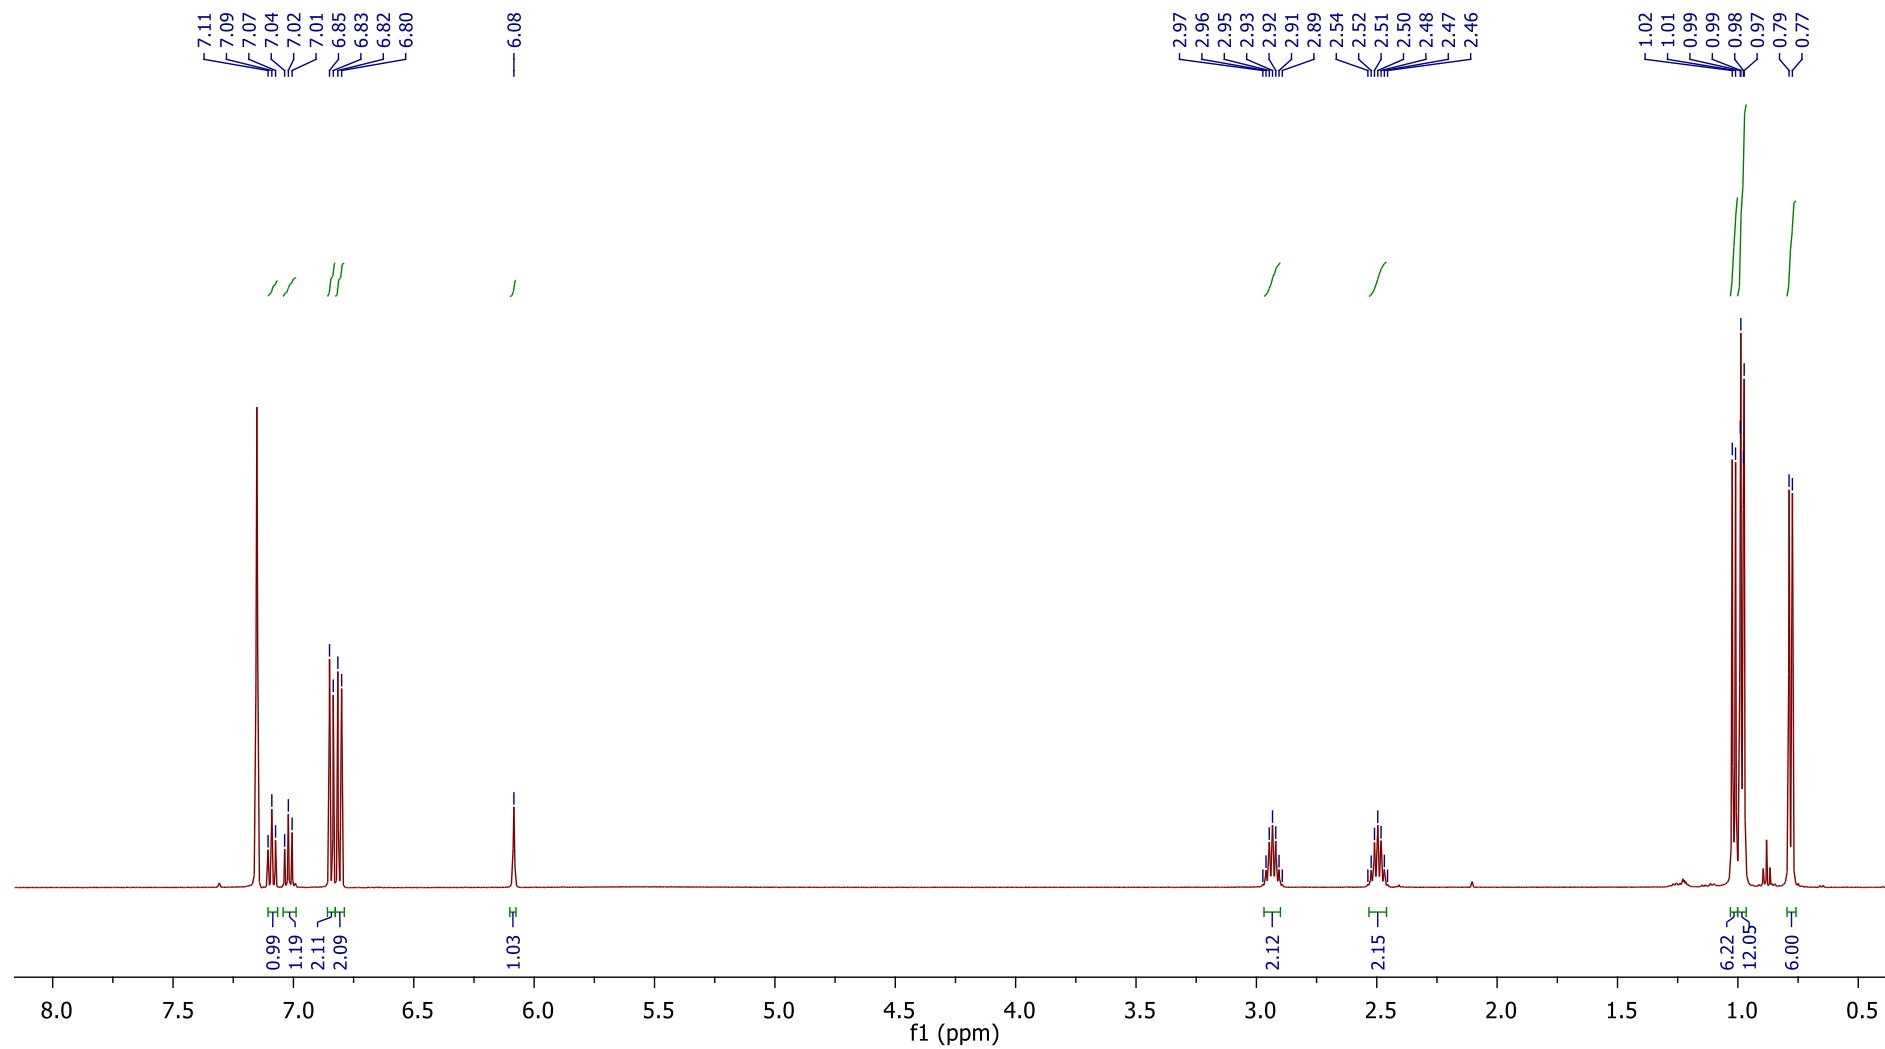

Figure S 33. <sup>1</sup>H NMR spectrum (500 MHz, C<sub>6</sub>D<sub>6</sub>, 298K) of (WCA-IDipp)OH (**10**).

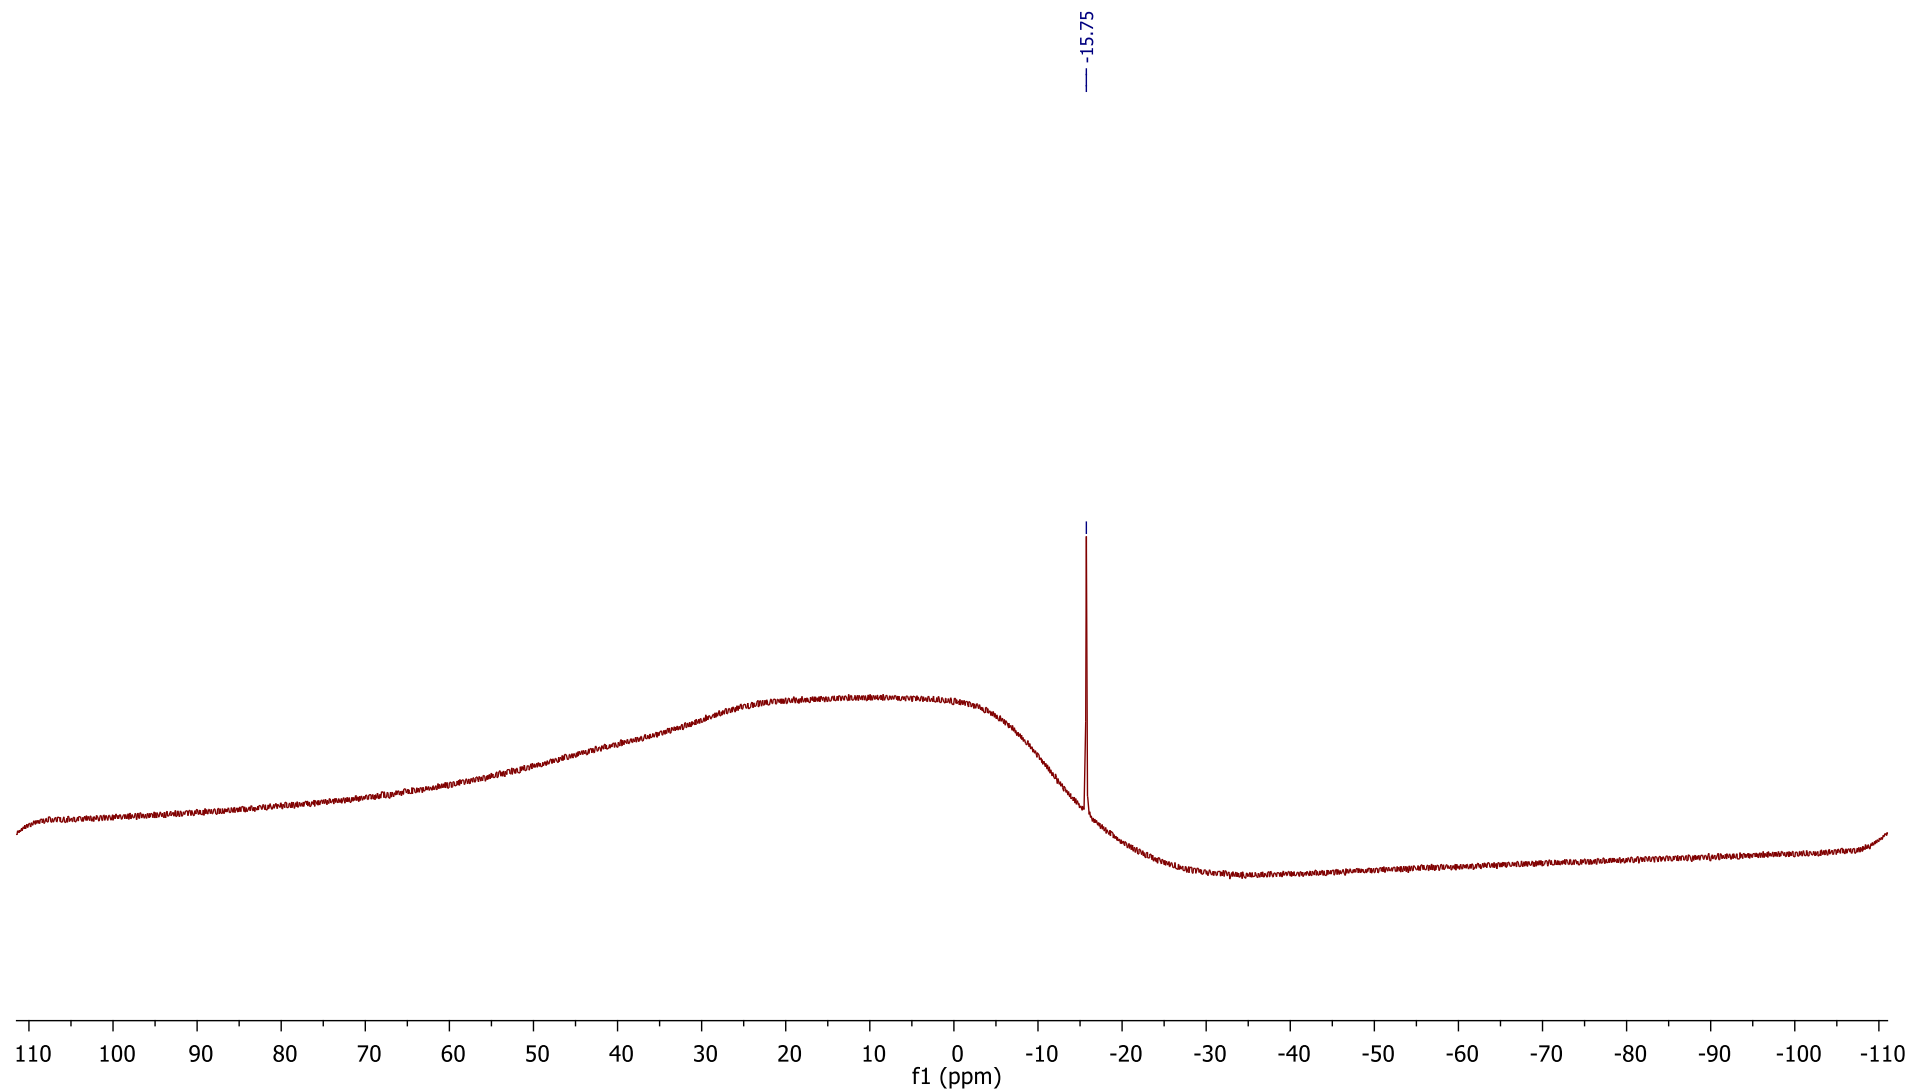

**Figure S 34.**  $^{11}\text{B}$  NMR spectrum (161 MHz,  $\text{C}_6\text{D}_6$ , 298K) of (WCA-IDipp)OH (**10**).

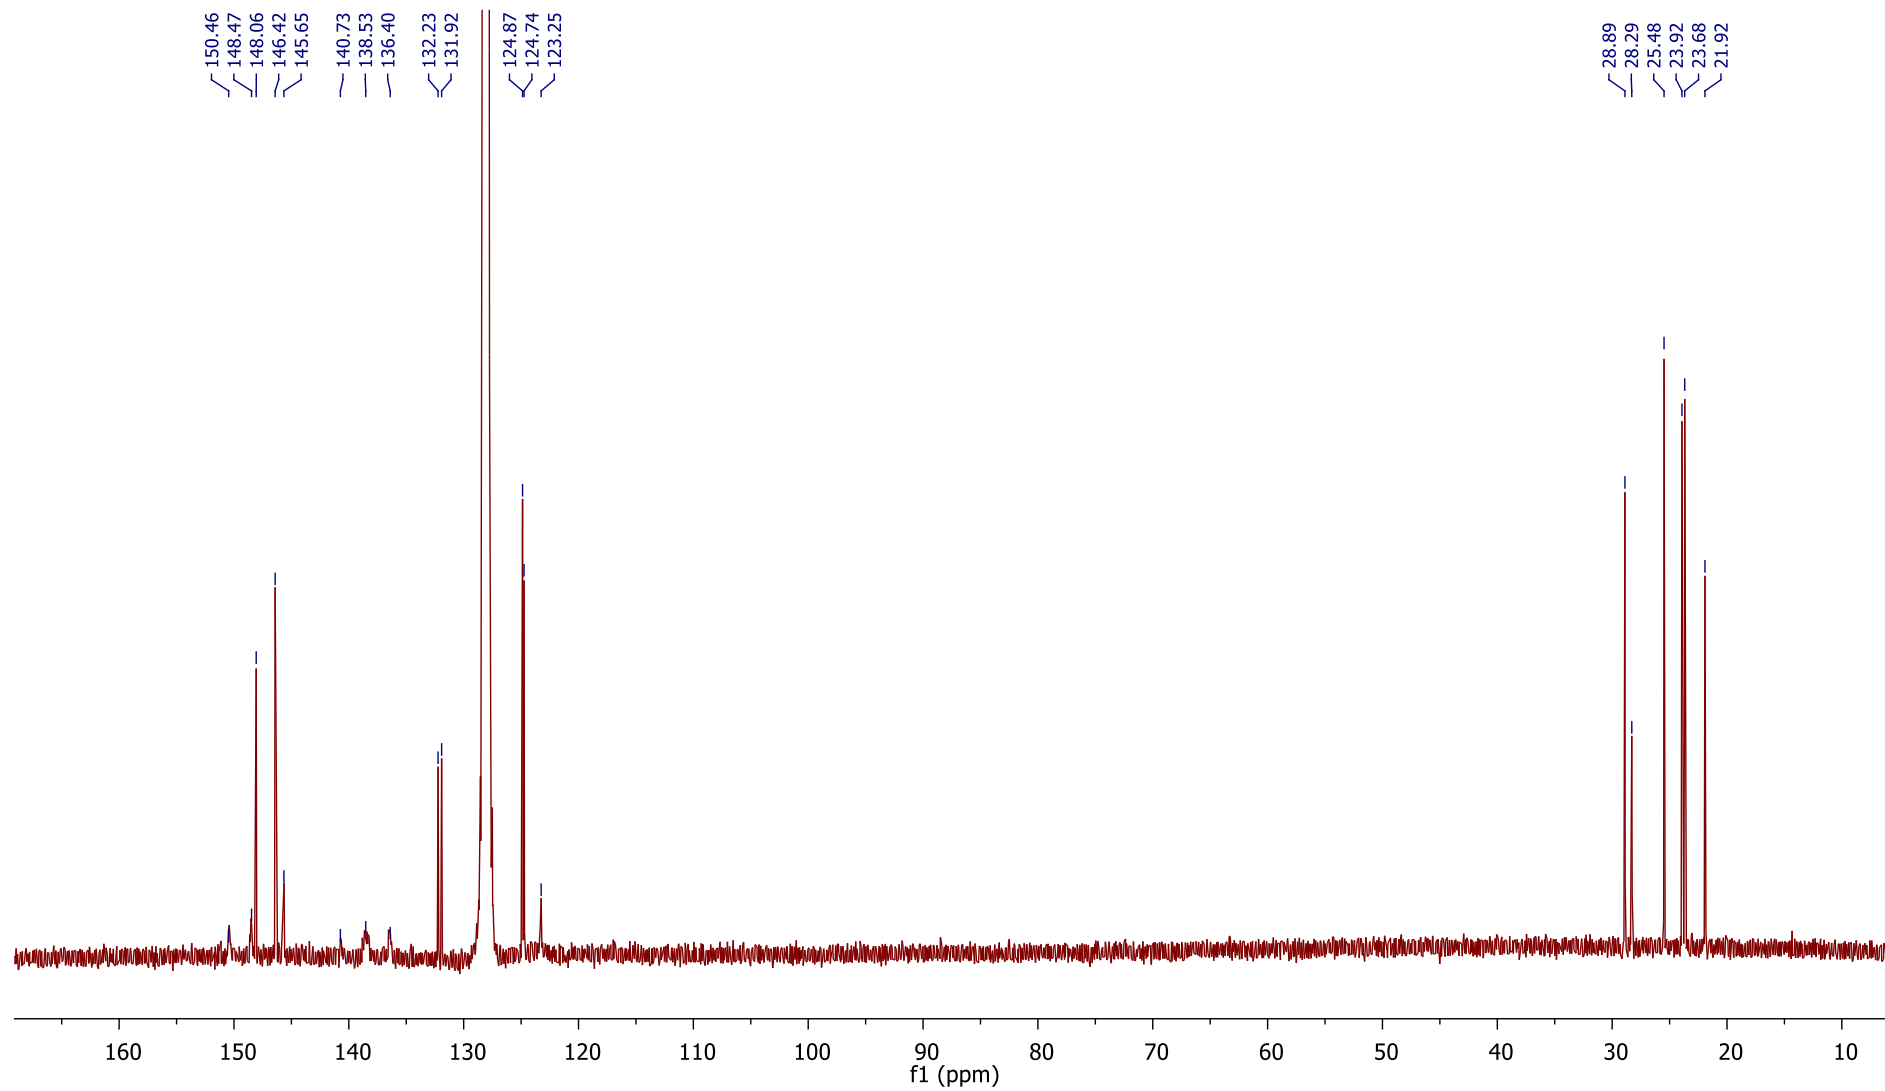

Figure S 35.  $^{13}\text{C}$  NMR spectrum (126 MHz,  $\text{C}_6\text{D}_6$ , 298K) of (WCA-IDipp)OH (10).



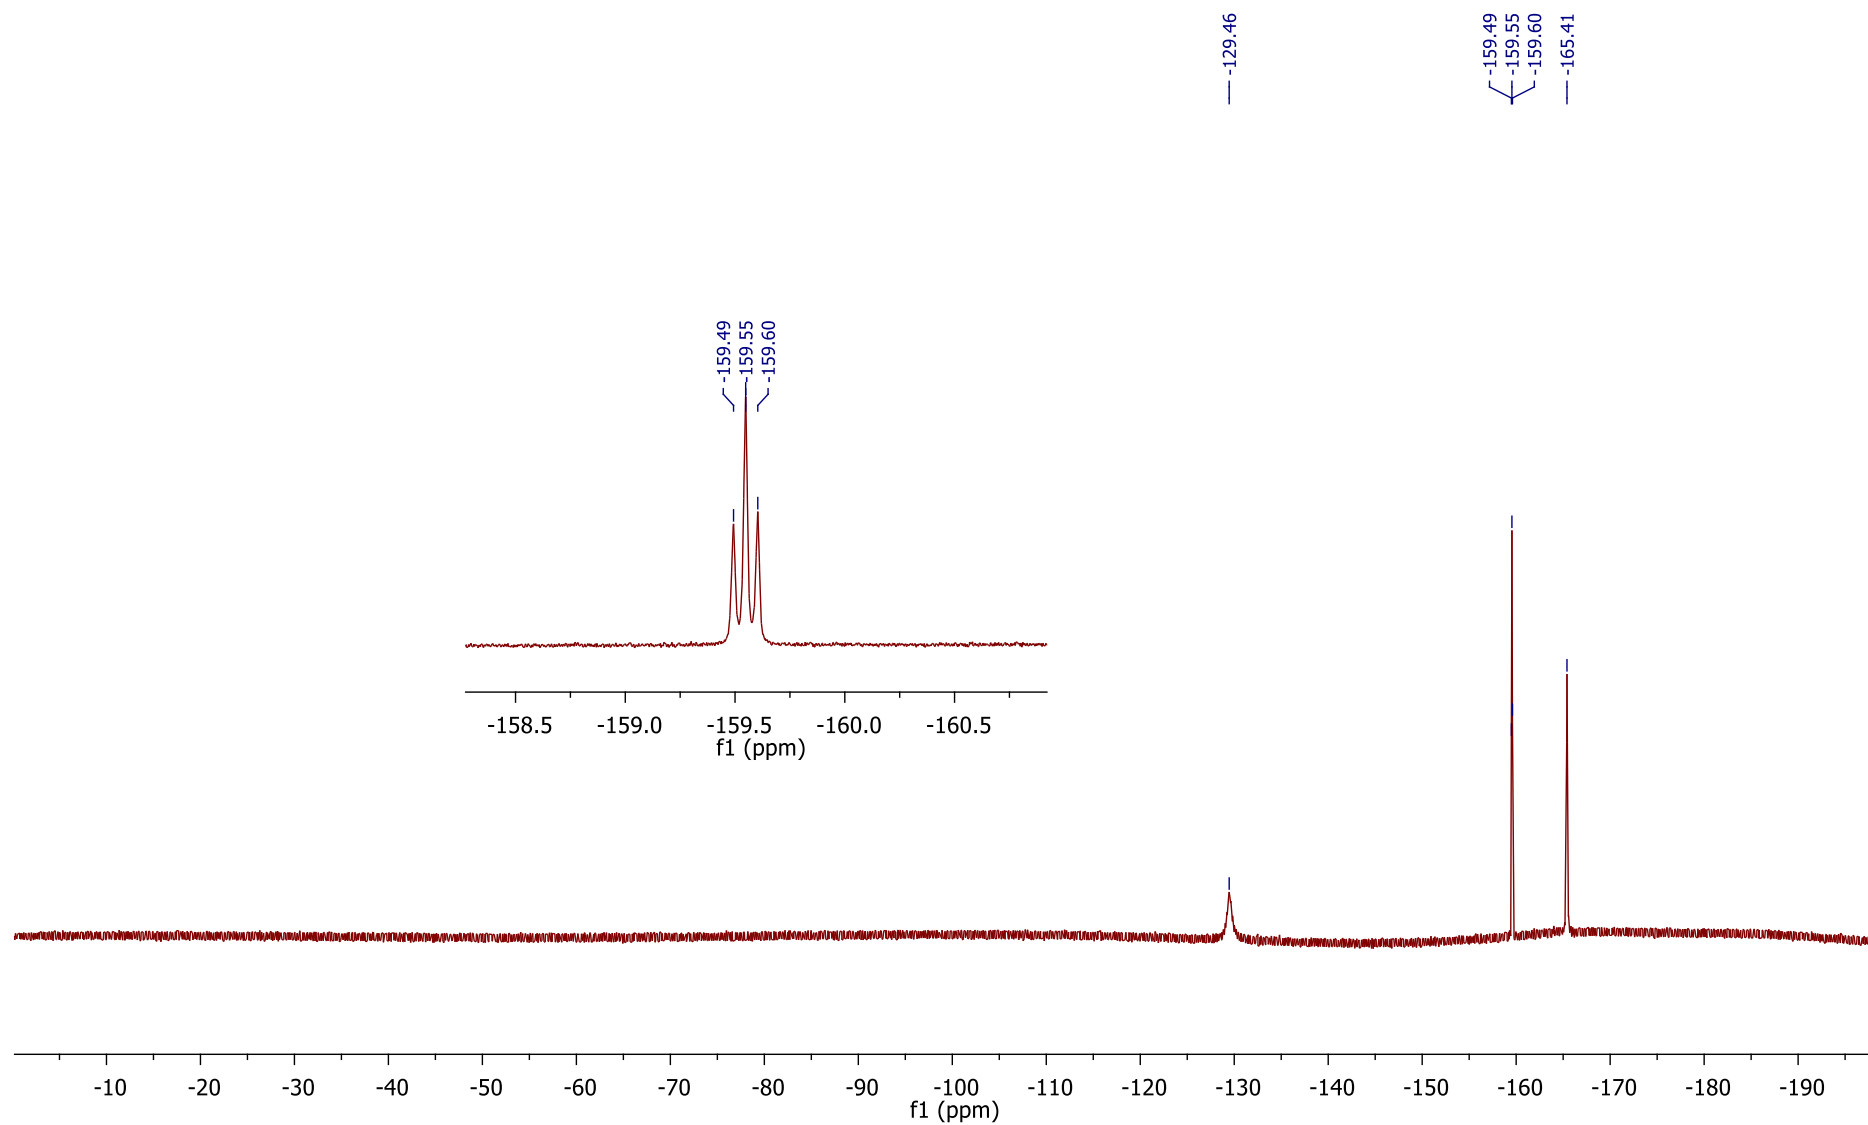

Figure S 36.  $^{19}\text{F}$  NMR spectrum (377 MHz,  $\text{C}_6\text{D}_6$ , 298K) of (WCA-IDipp)OH (10).

S2.7 (WCA-IDipp)SH (**11**)

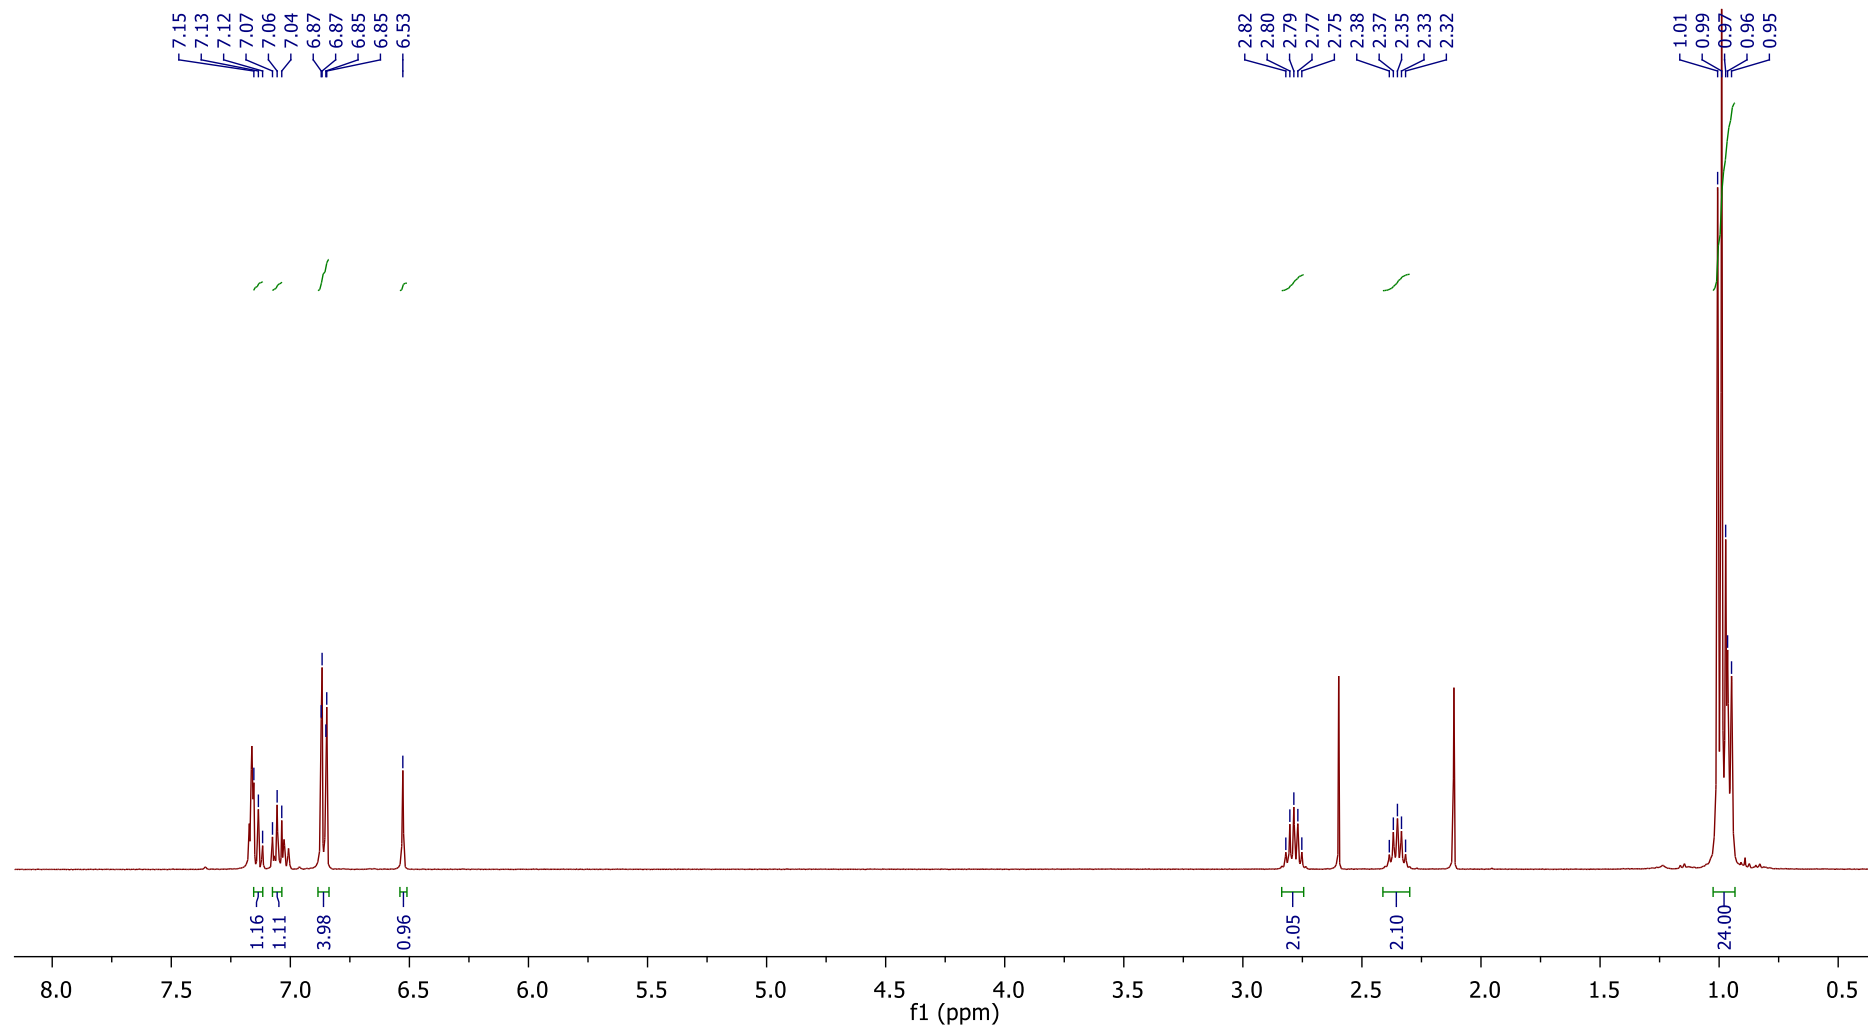

Figure S 37.  $^1\text{H}$  NMR spectrum (400 MHz,  $\text{C}_6\text{D}_6$ , 298K) of (WCA-IDipp)SH (**11**).

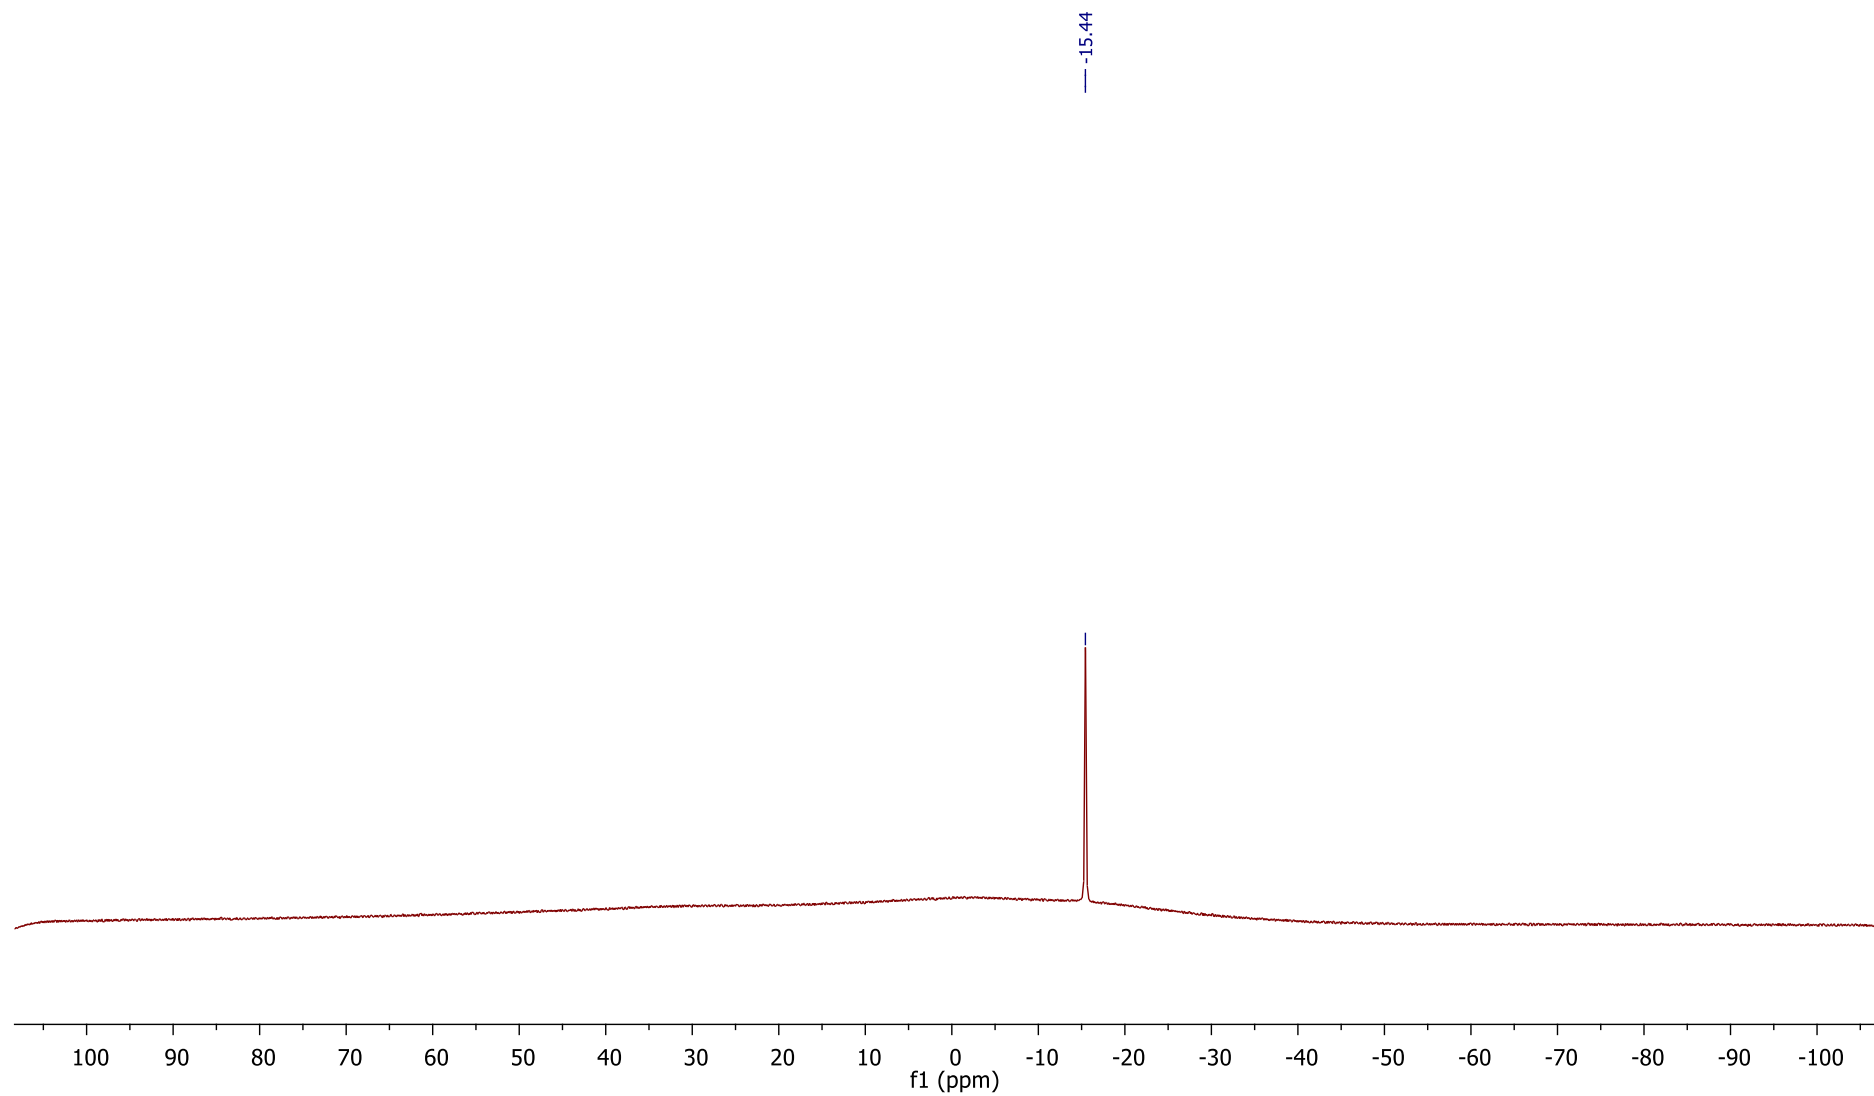

**Figure S 38.**  $^{11}\text{B}$  NMR spectrum (128 MHz,  $\text{C}_6\text{D}_6$ , 298K) of (WCA-IDipp)SH (**11**).

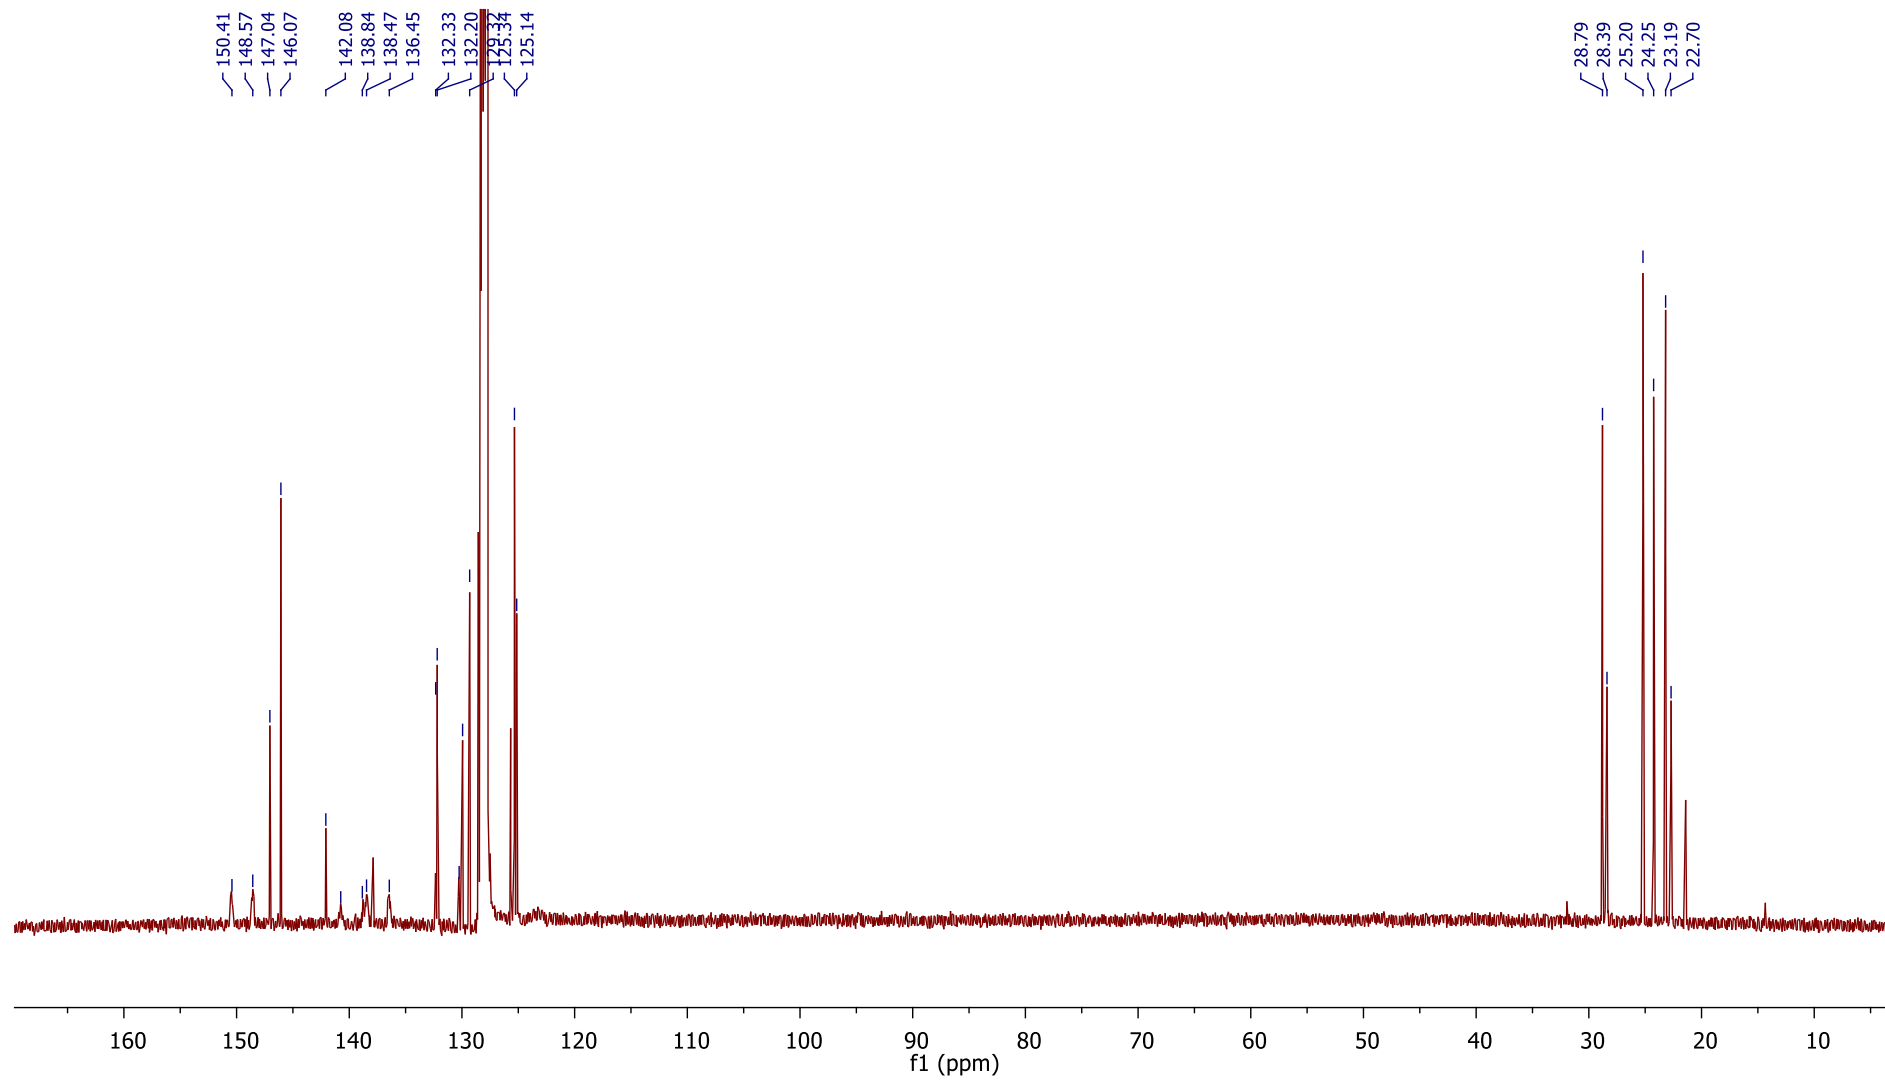

Figure S 39. <sup>13</sup>C NMR spectrum (126 MHz, C<sub>6</sub>D<sub>6</sub>, 298K) of (WCA-IDipp)SH (**11**).

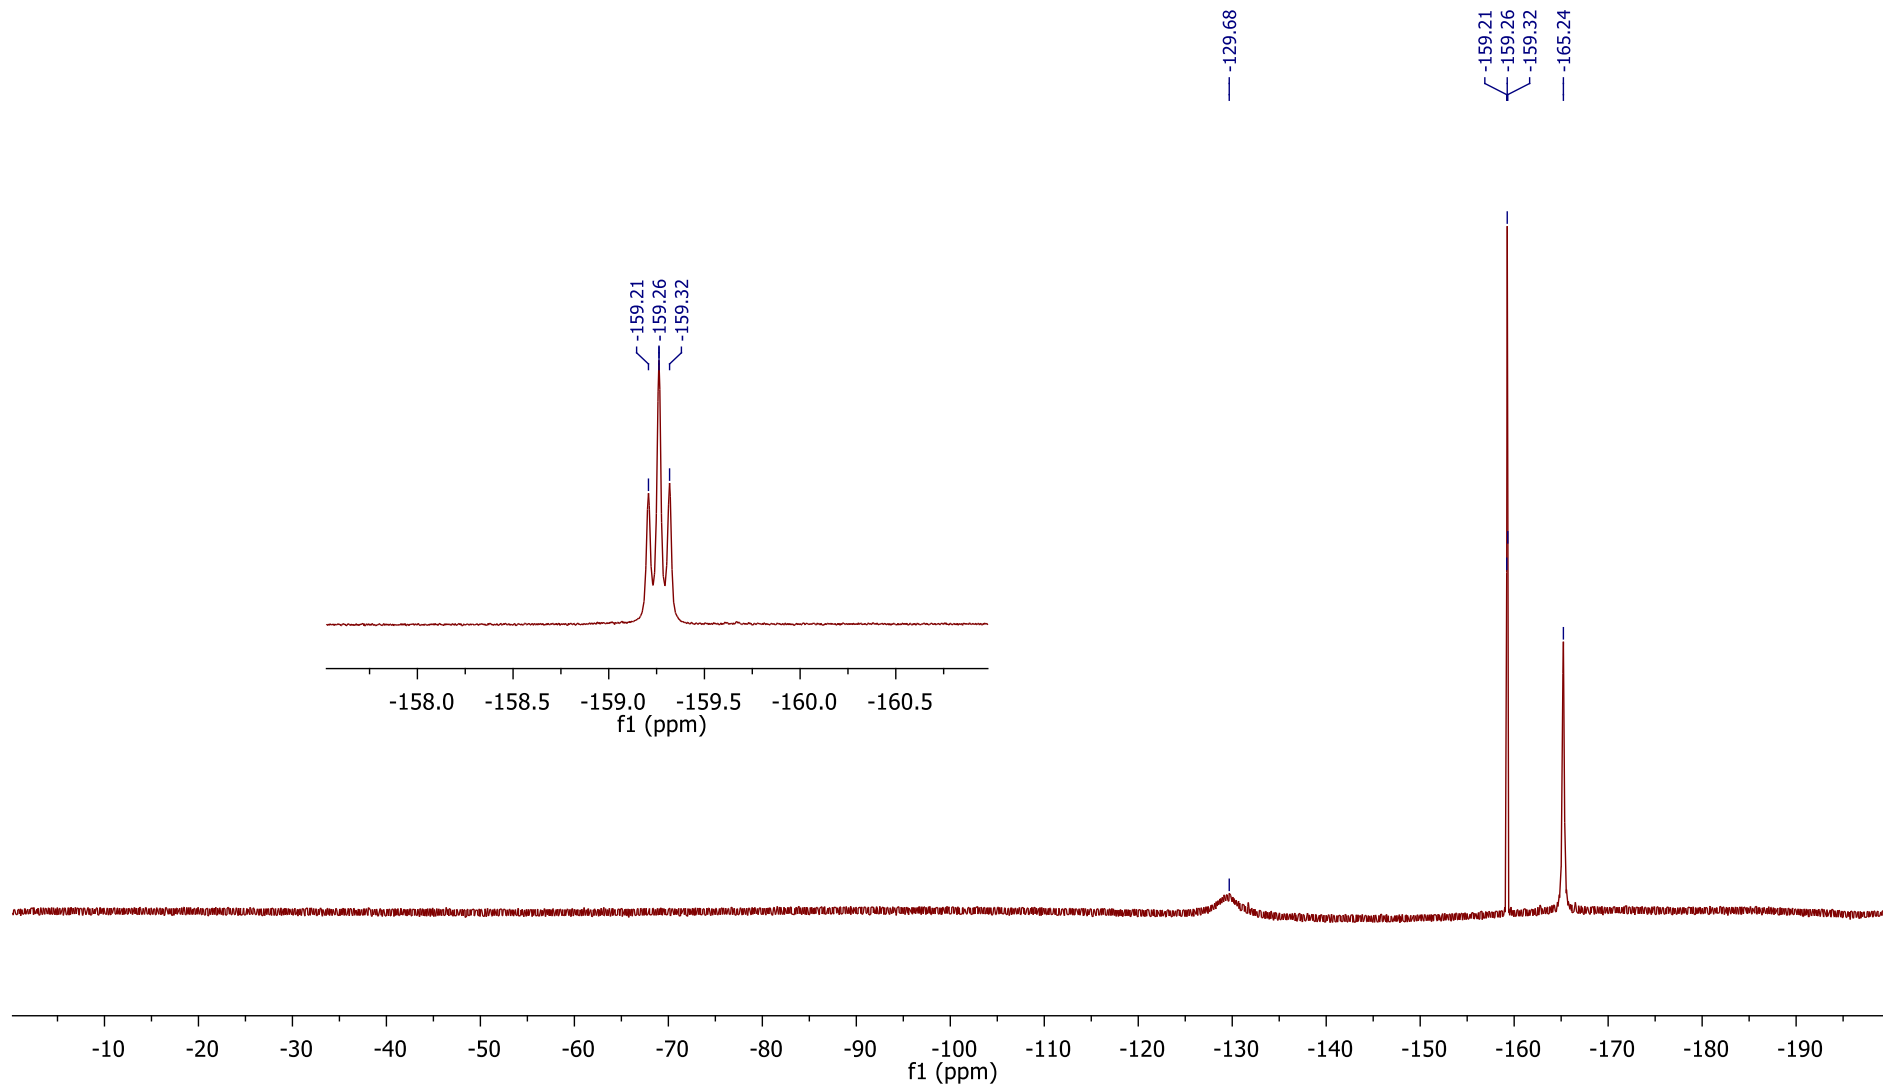

Figure S 40.  $^{19}\text{F}$  NMR spectrum (377 MHz,  $\text{C}_6\text{D}_6$ , 298K) of (WCA-IDipp)SH (**11**).

**S2.8 (WCA-IDipp)SeH (12)**

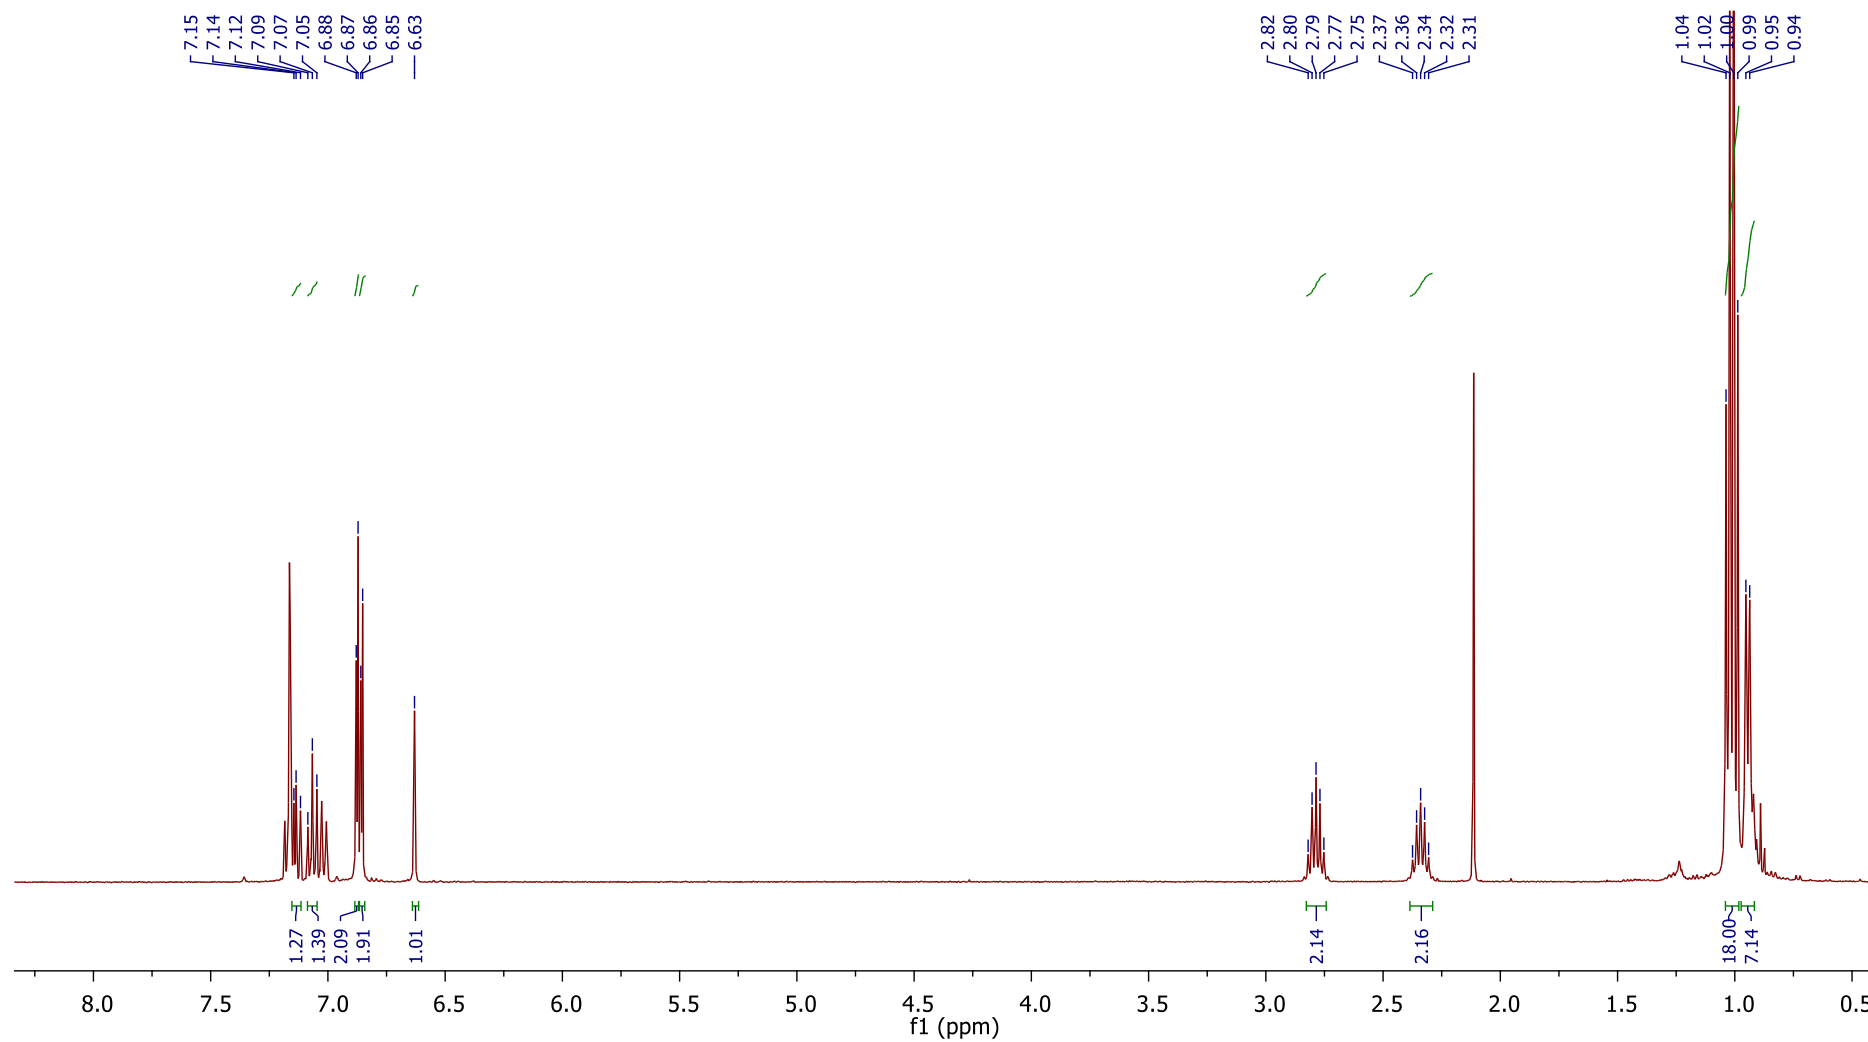

**Figure S 41.**  $^1\text{H}$  NMR spectrum (400 MHz,  $\text{C}_6\text{D}_6$ , 298K) of (WCA-IDipp)SeH (12).

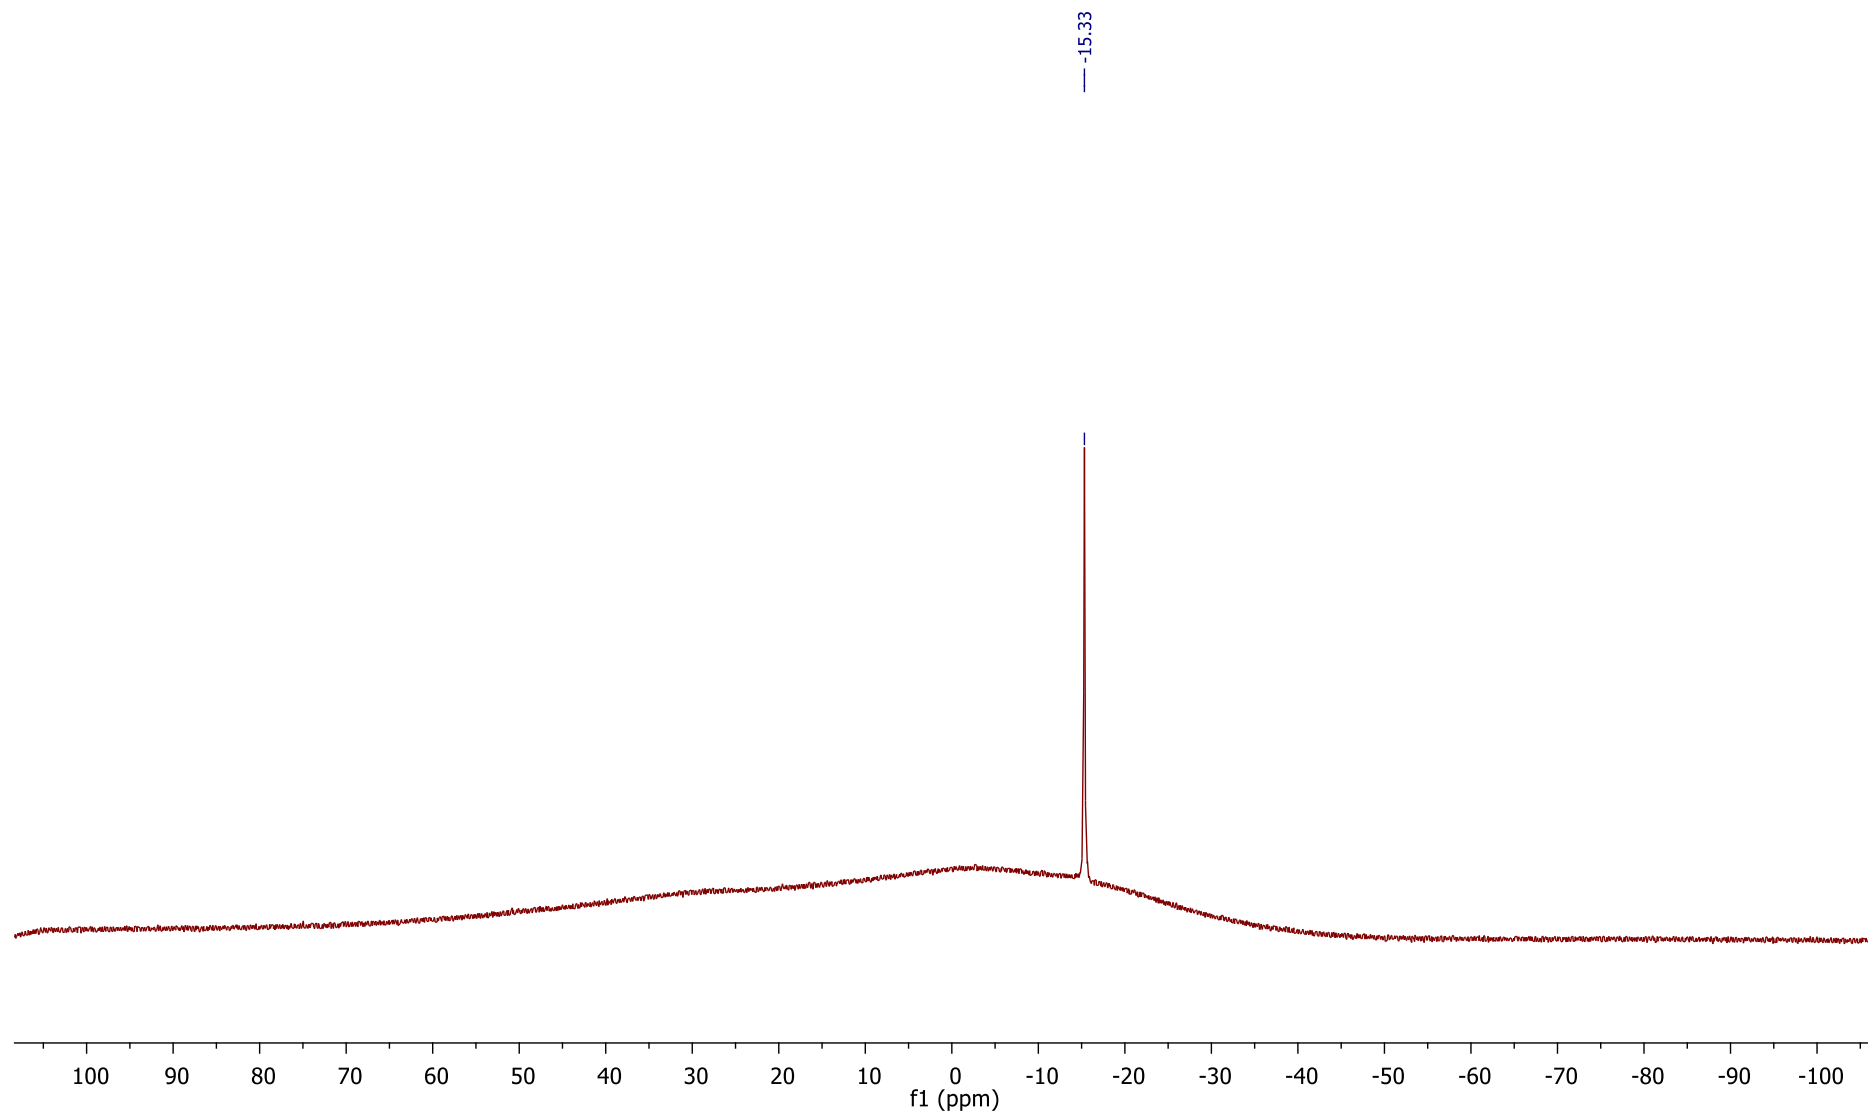

Figure S 42.  $^{11}\text{B}$  NMR spectrum (128 MHz,  $\text{C}_6\text{D}_6$ , 298K) of (WCA-IDipp)SeH (**12**).

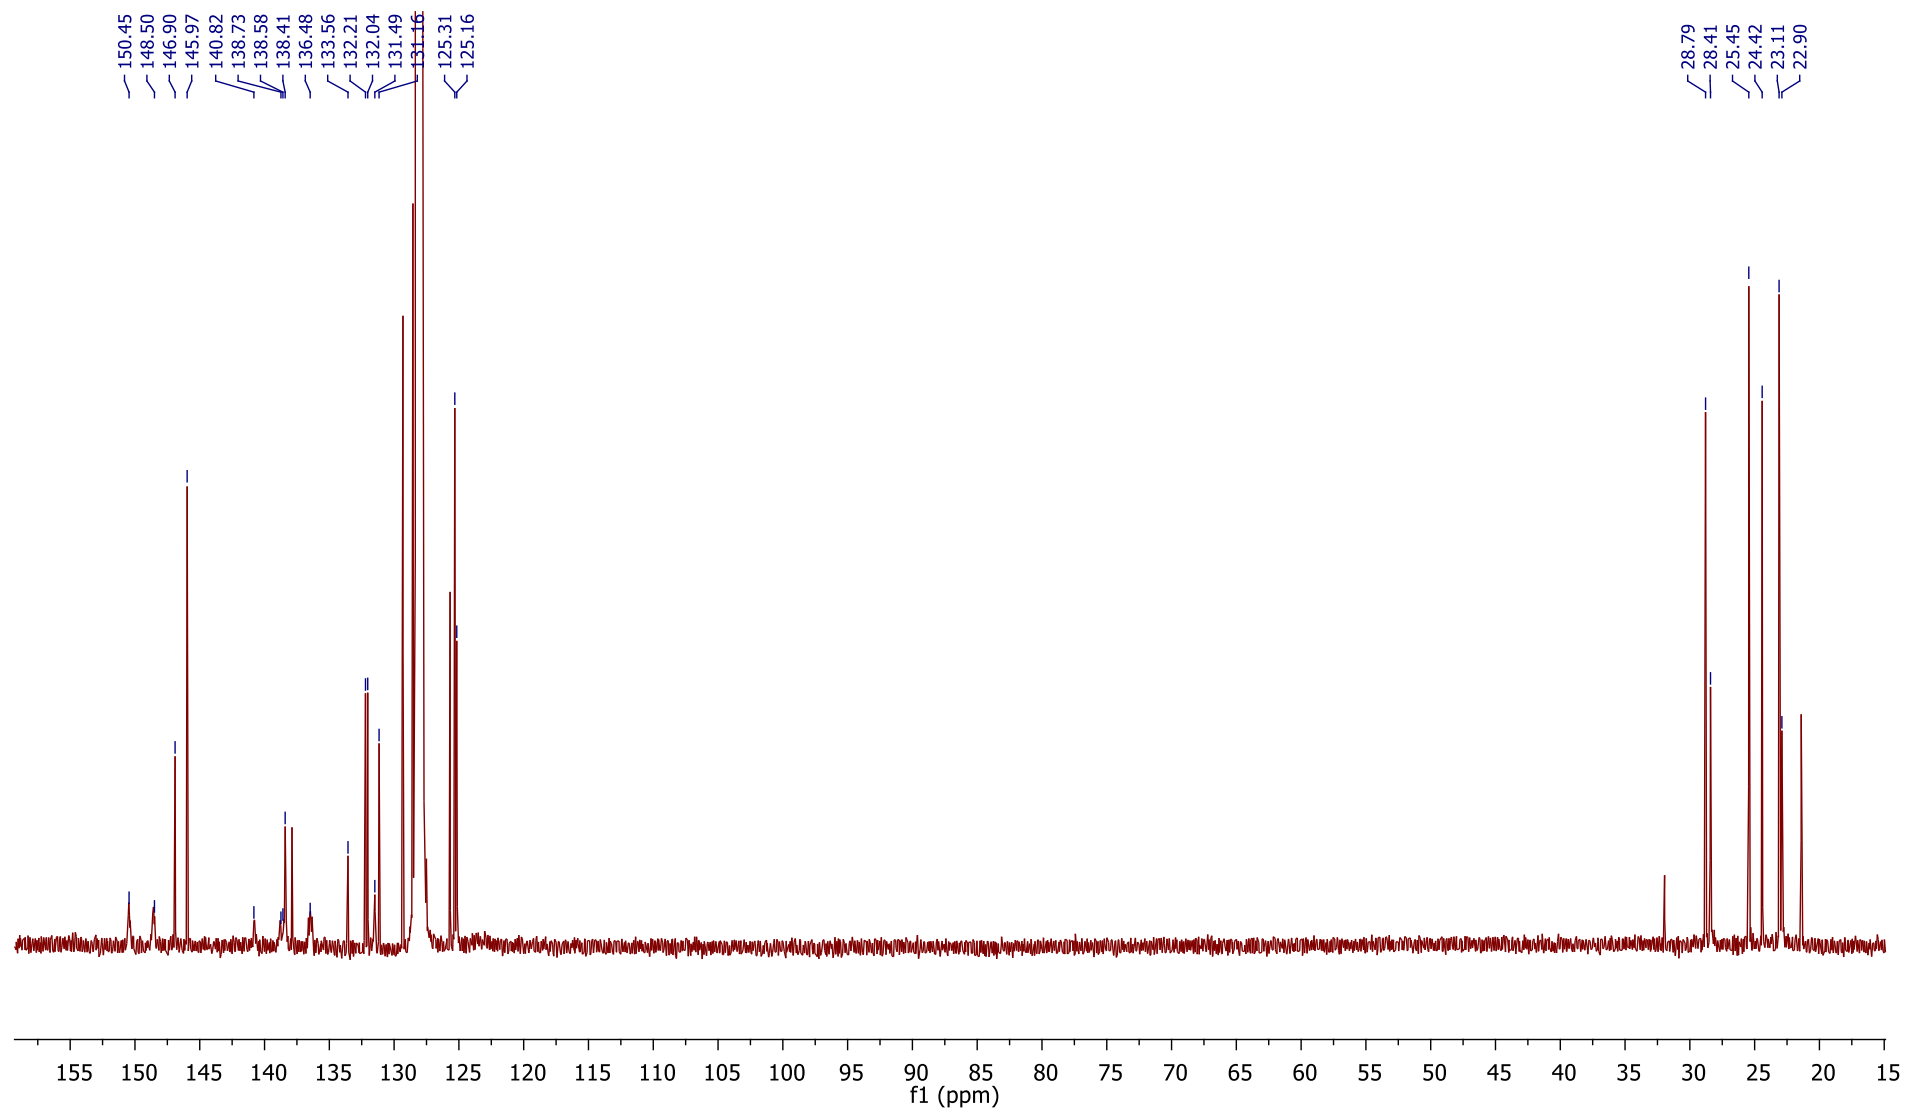

Figure S 43. <sup>13</sup>C NMR spectrum (126 MHz, C<sub>6</sub>D<sub>6</sub>, 298K) of (WCA-IDipp)SeH (**12**).



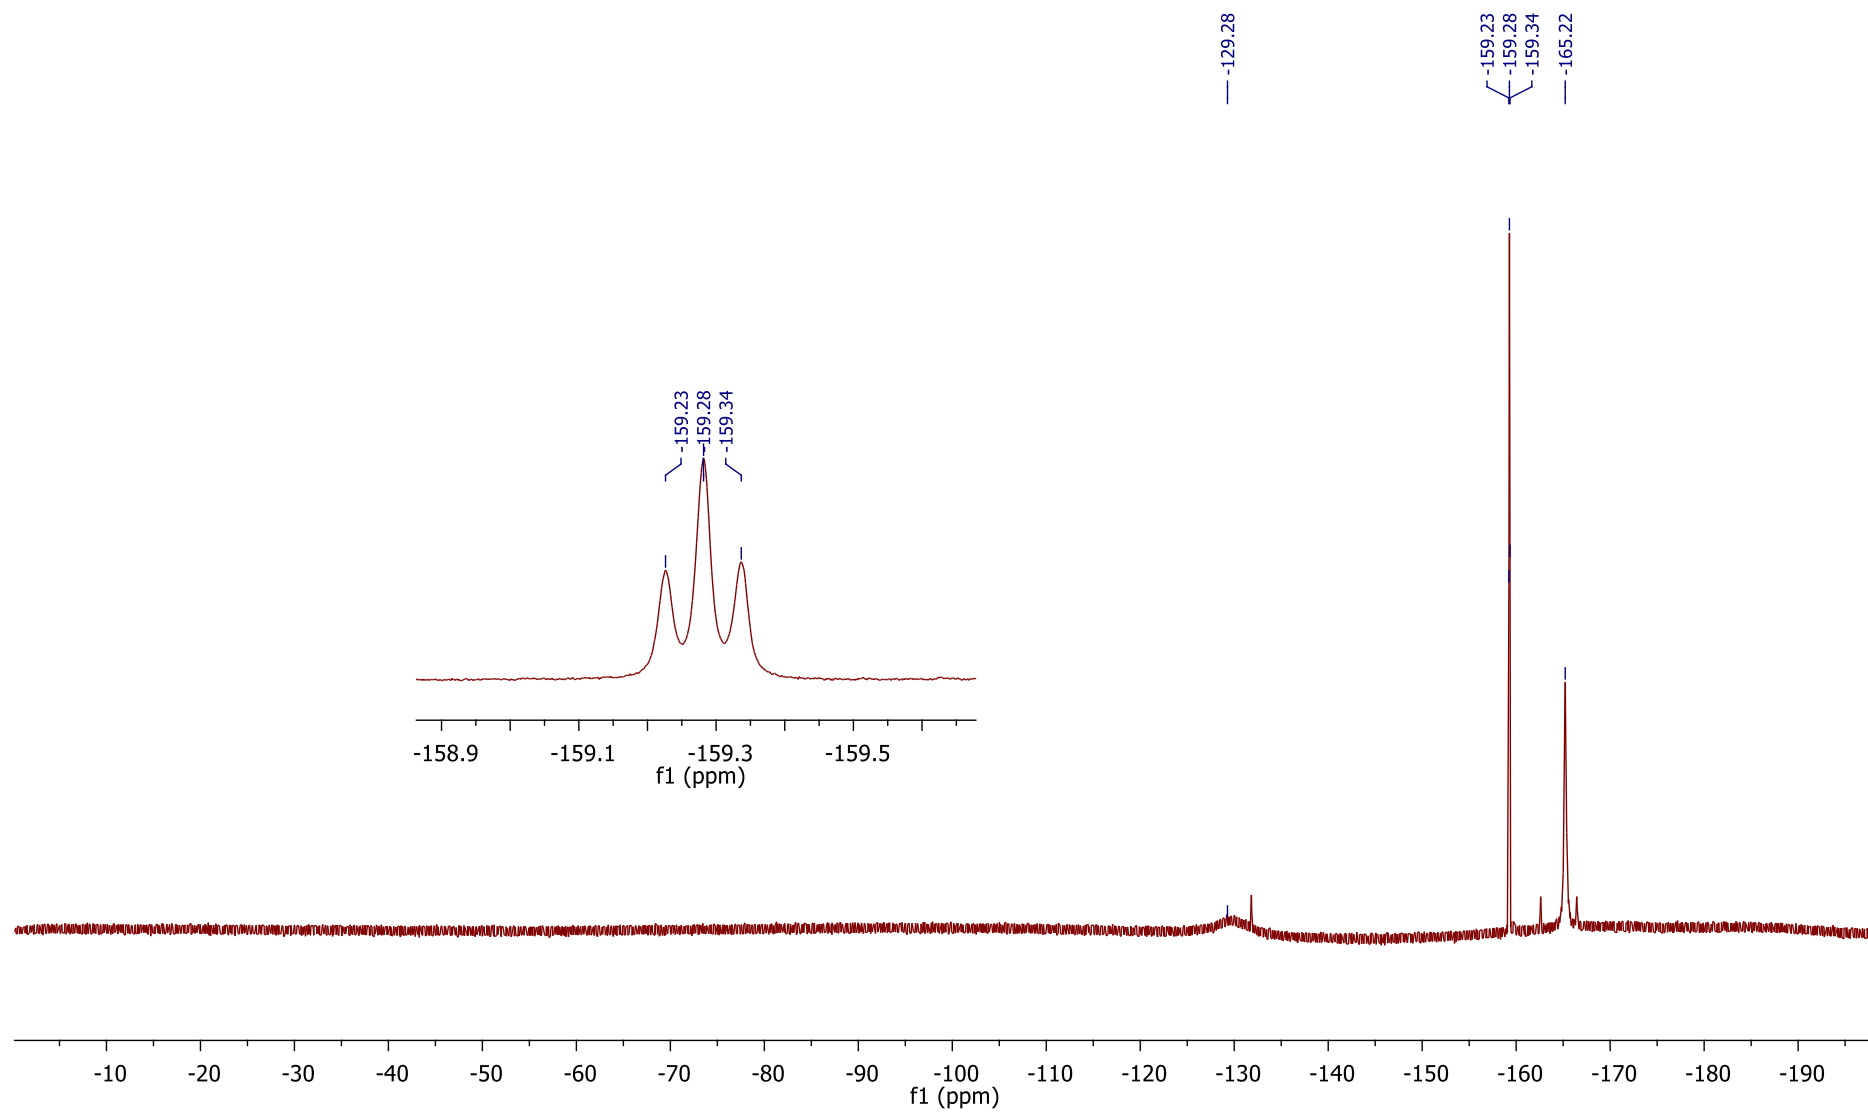

Figure S 44.  $^{19}\text{F}$  NMR spectrum (377 MHz,  $\text{C}_6\text{D}_6$ , 298K) of (WCA-IDipp)SeH (12).

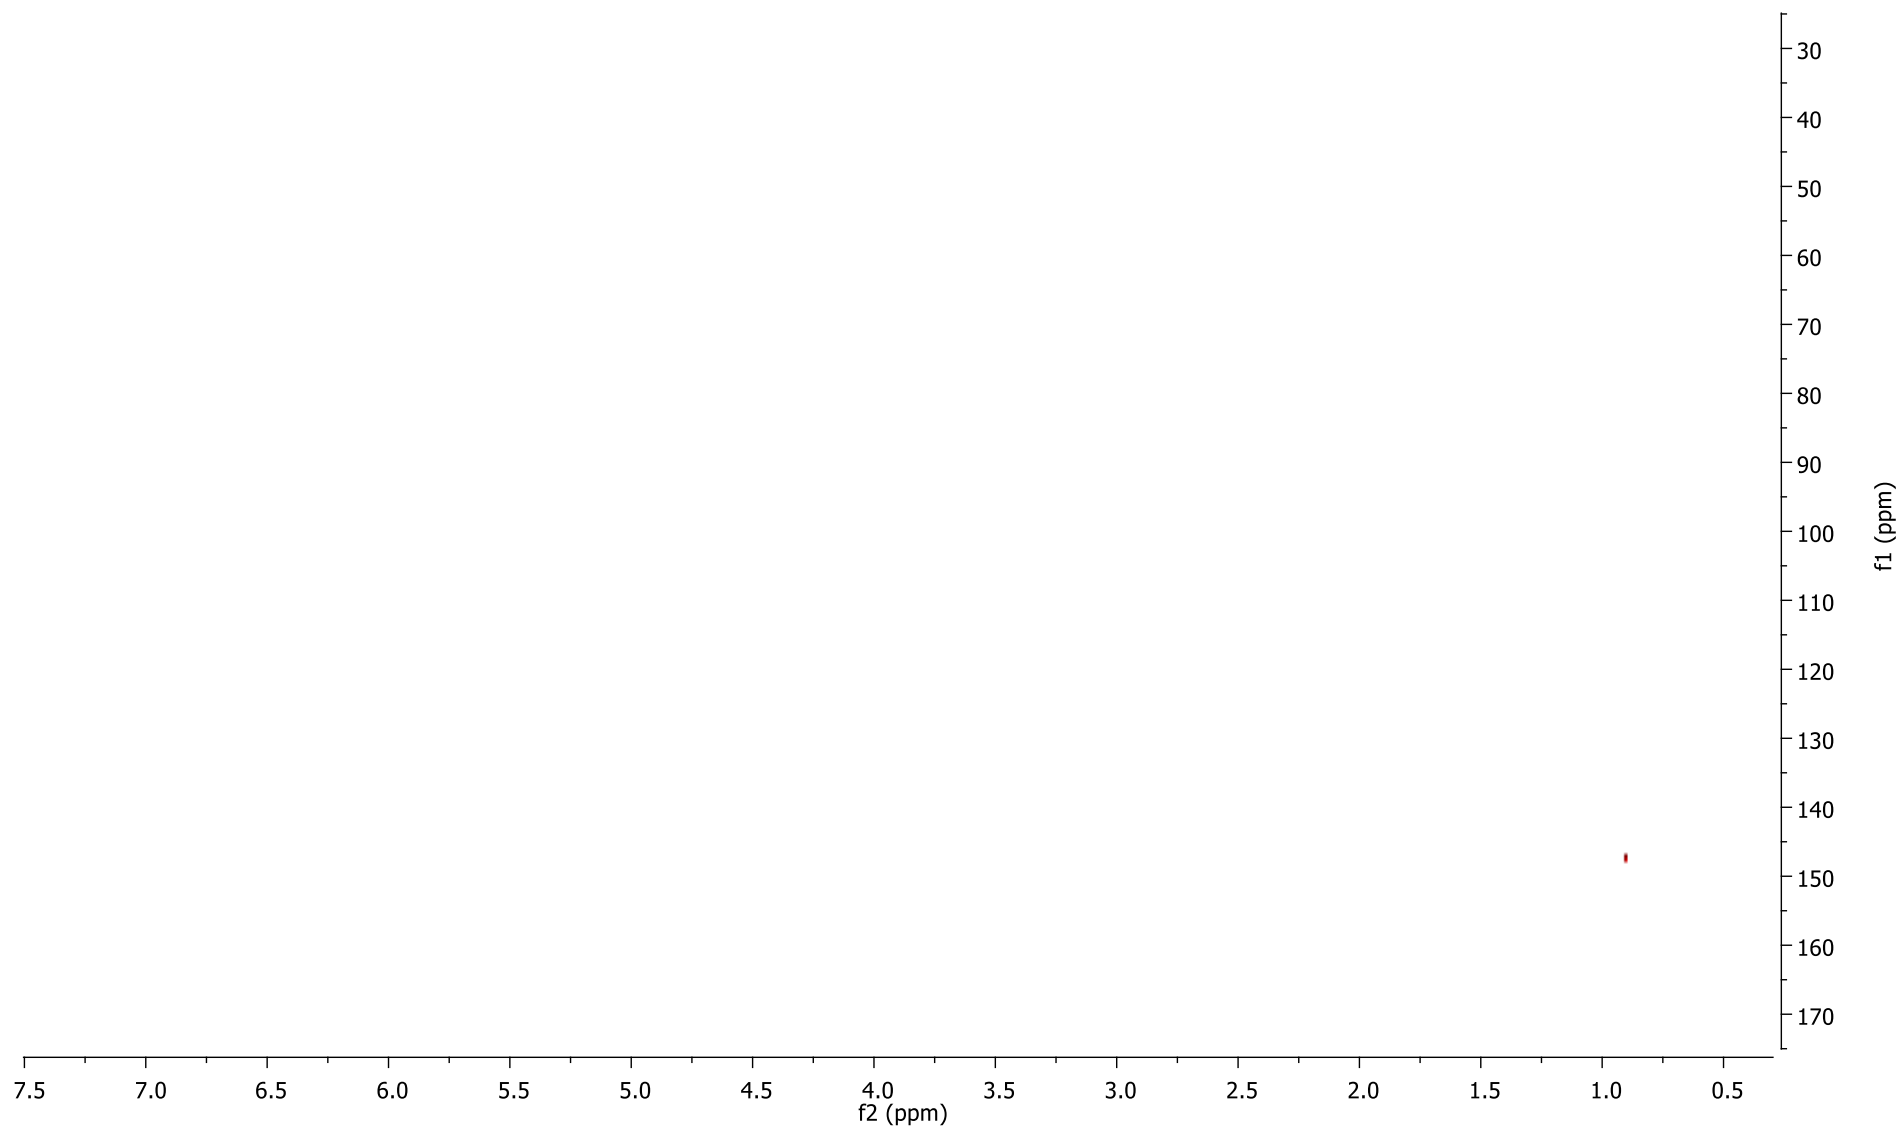

**Figure S 45.**  $^1\text{H}$ ,  $^{77}\text{Se}$ -HMBC NMR (500 & 95 MHz,  $\text{C}_6\text{D}_6$ , 298K) spectrum of (WCA-IDipp)SeH (**12**).

S2.9 (WCA-IDipp)<sub>2</sub>S<sub>2</sub> (**13**)

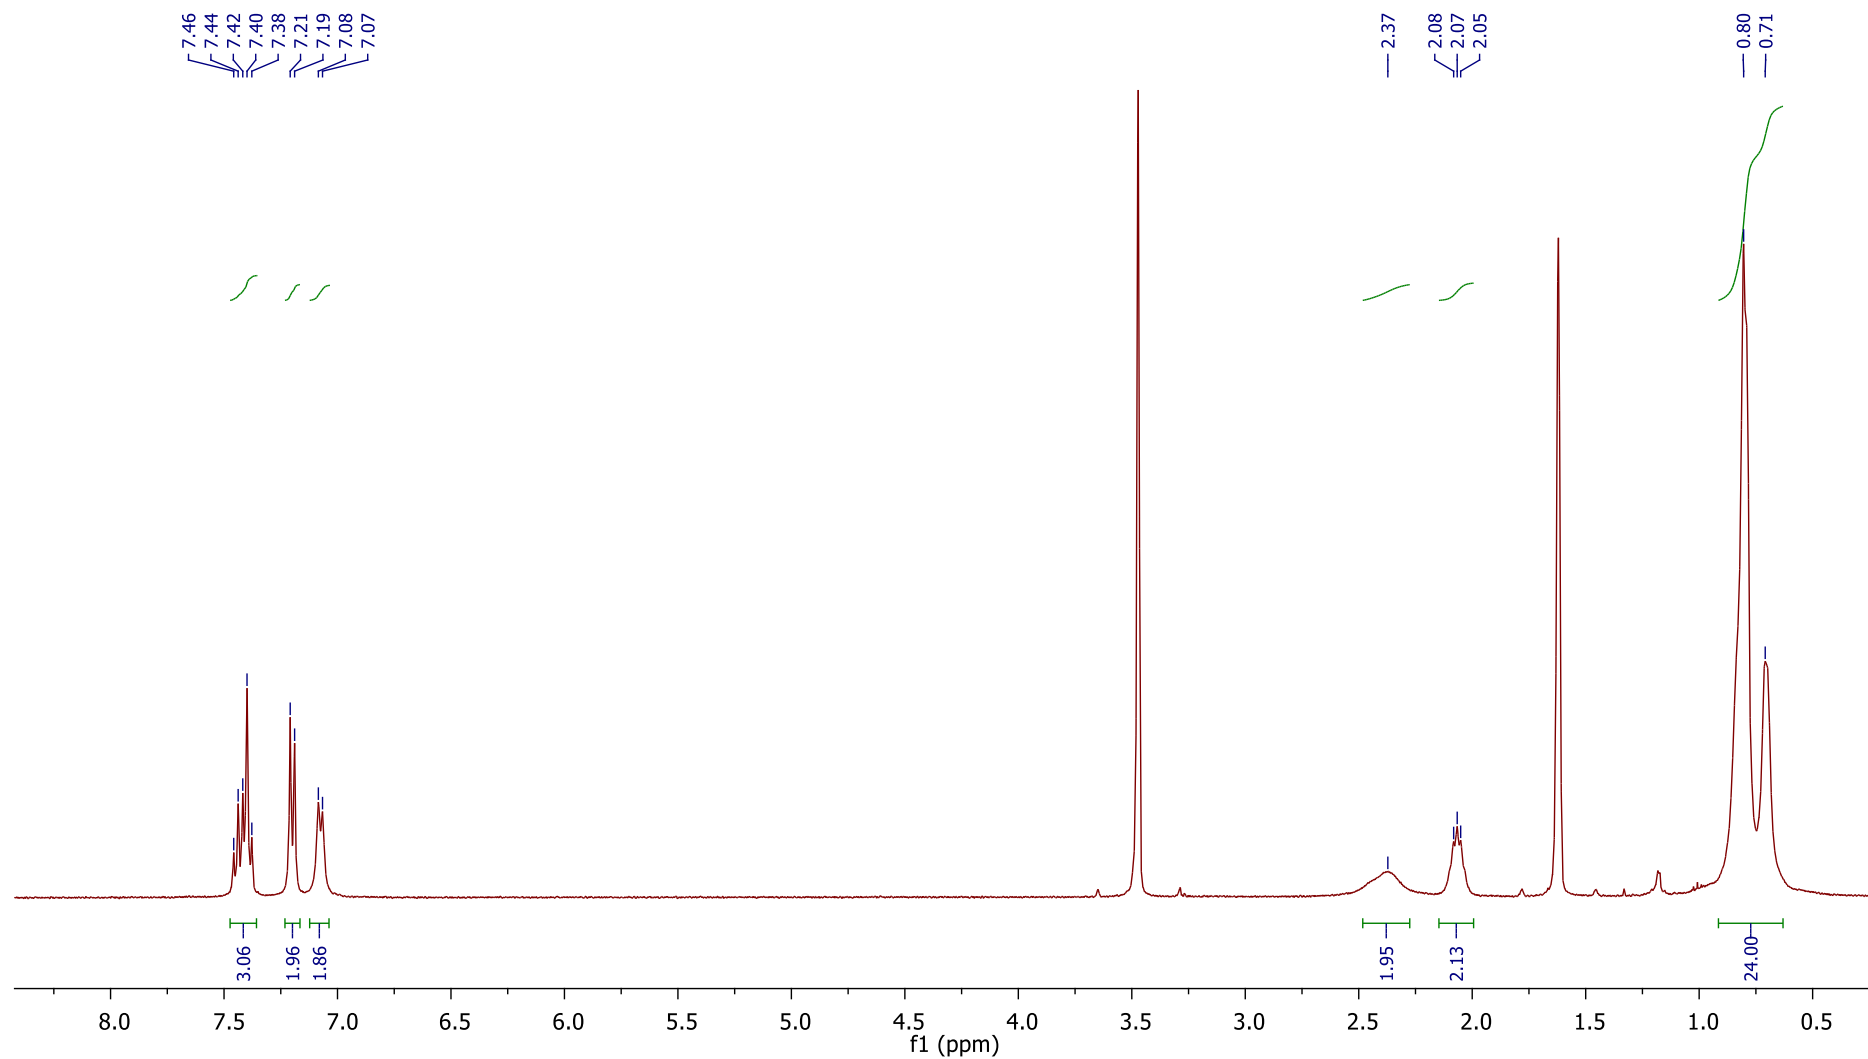

Figure S 46. <sup>1</sup>H NMR spectrum (400 MHz, THF-*d*<sub>8</sub>, 298K) of (WCA-IDipp)<sub>2</sub>S<sub>2</sub> (**13**).

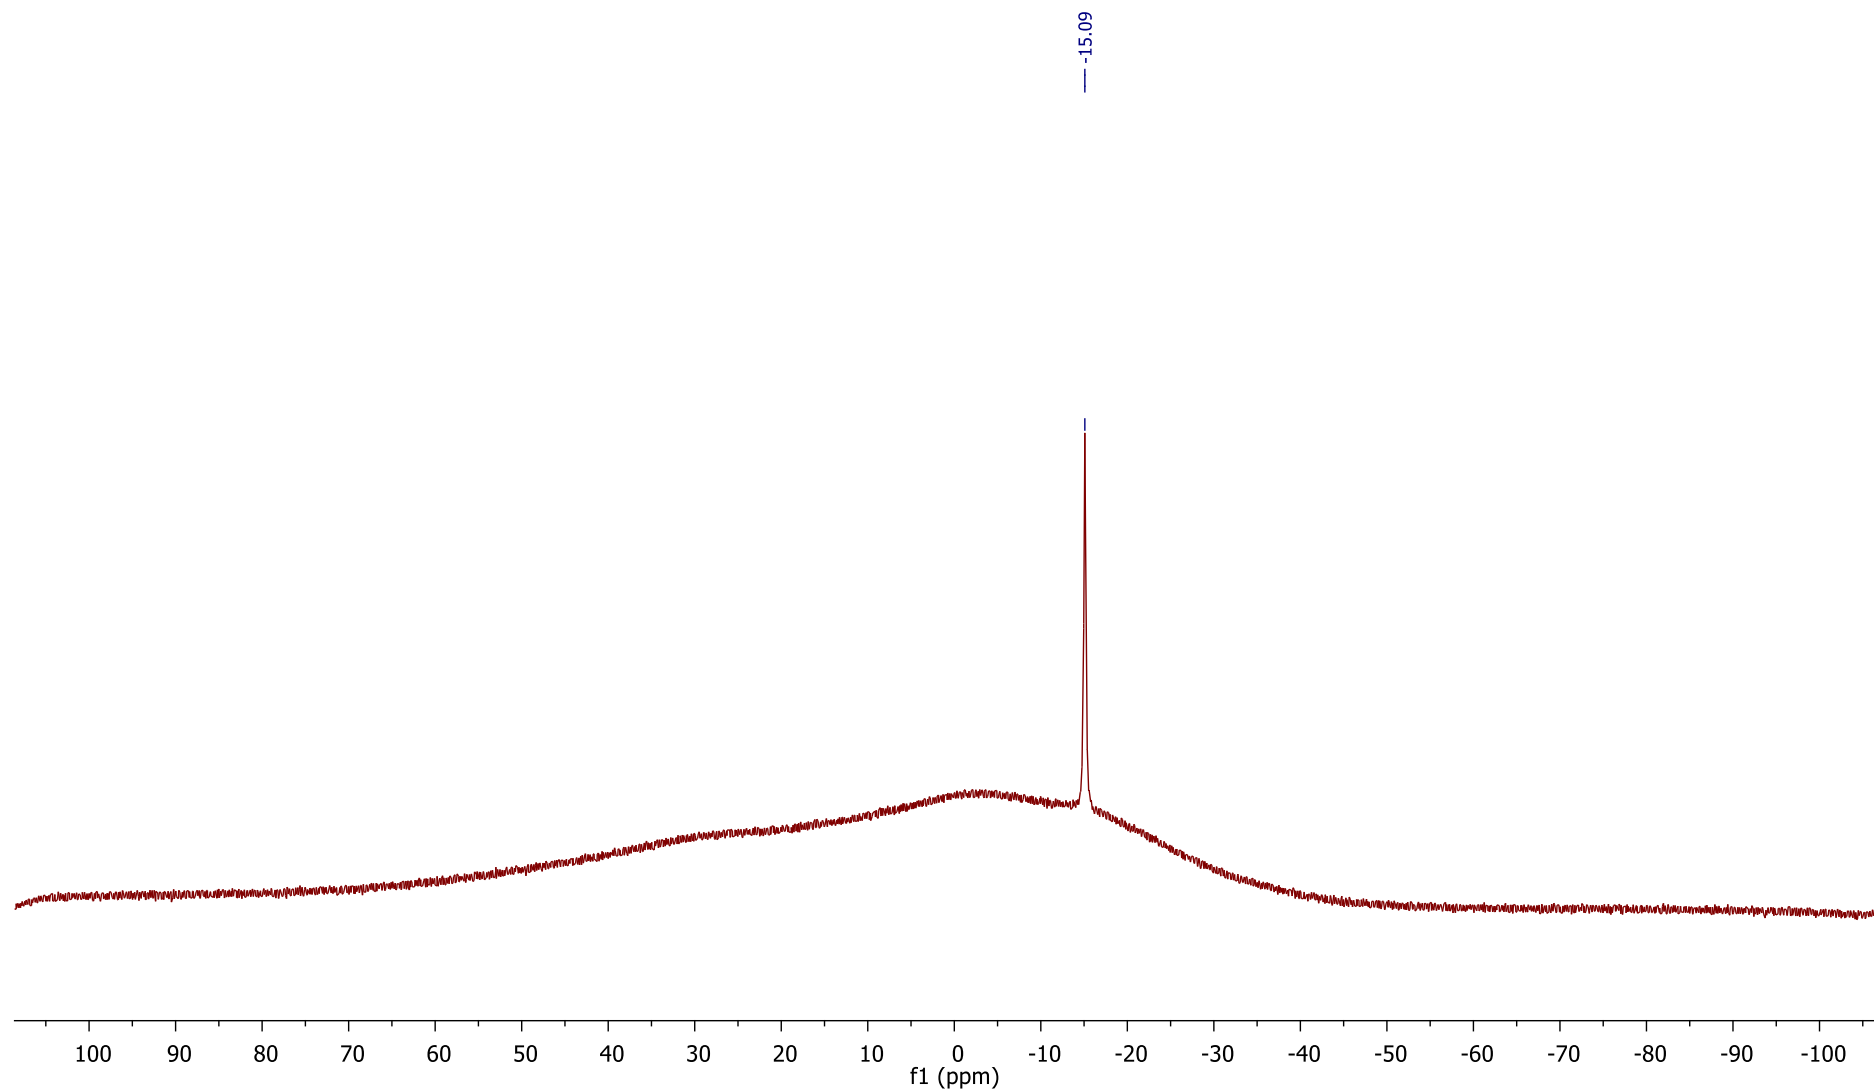

Figure S 47.  $^{11}\text{B}$  NMR spectrum (128 MHz, THF- $d_8$ , 298K) of (WCA-IDipp) $_2$ S $_2$  (**13**).

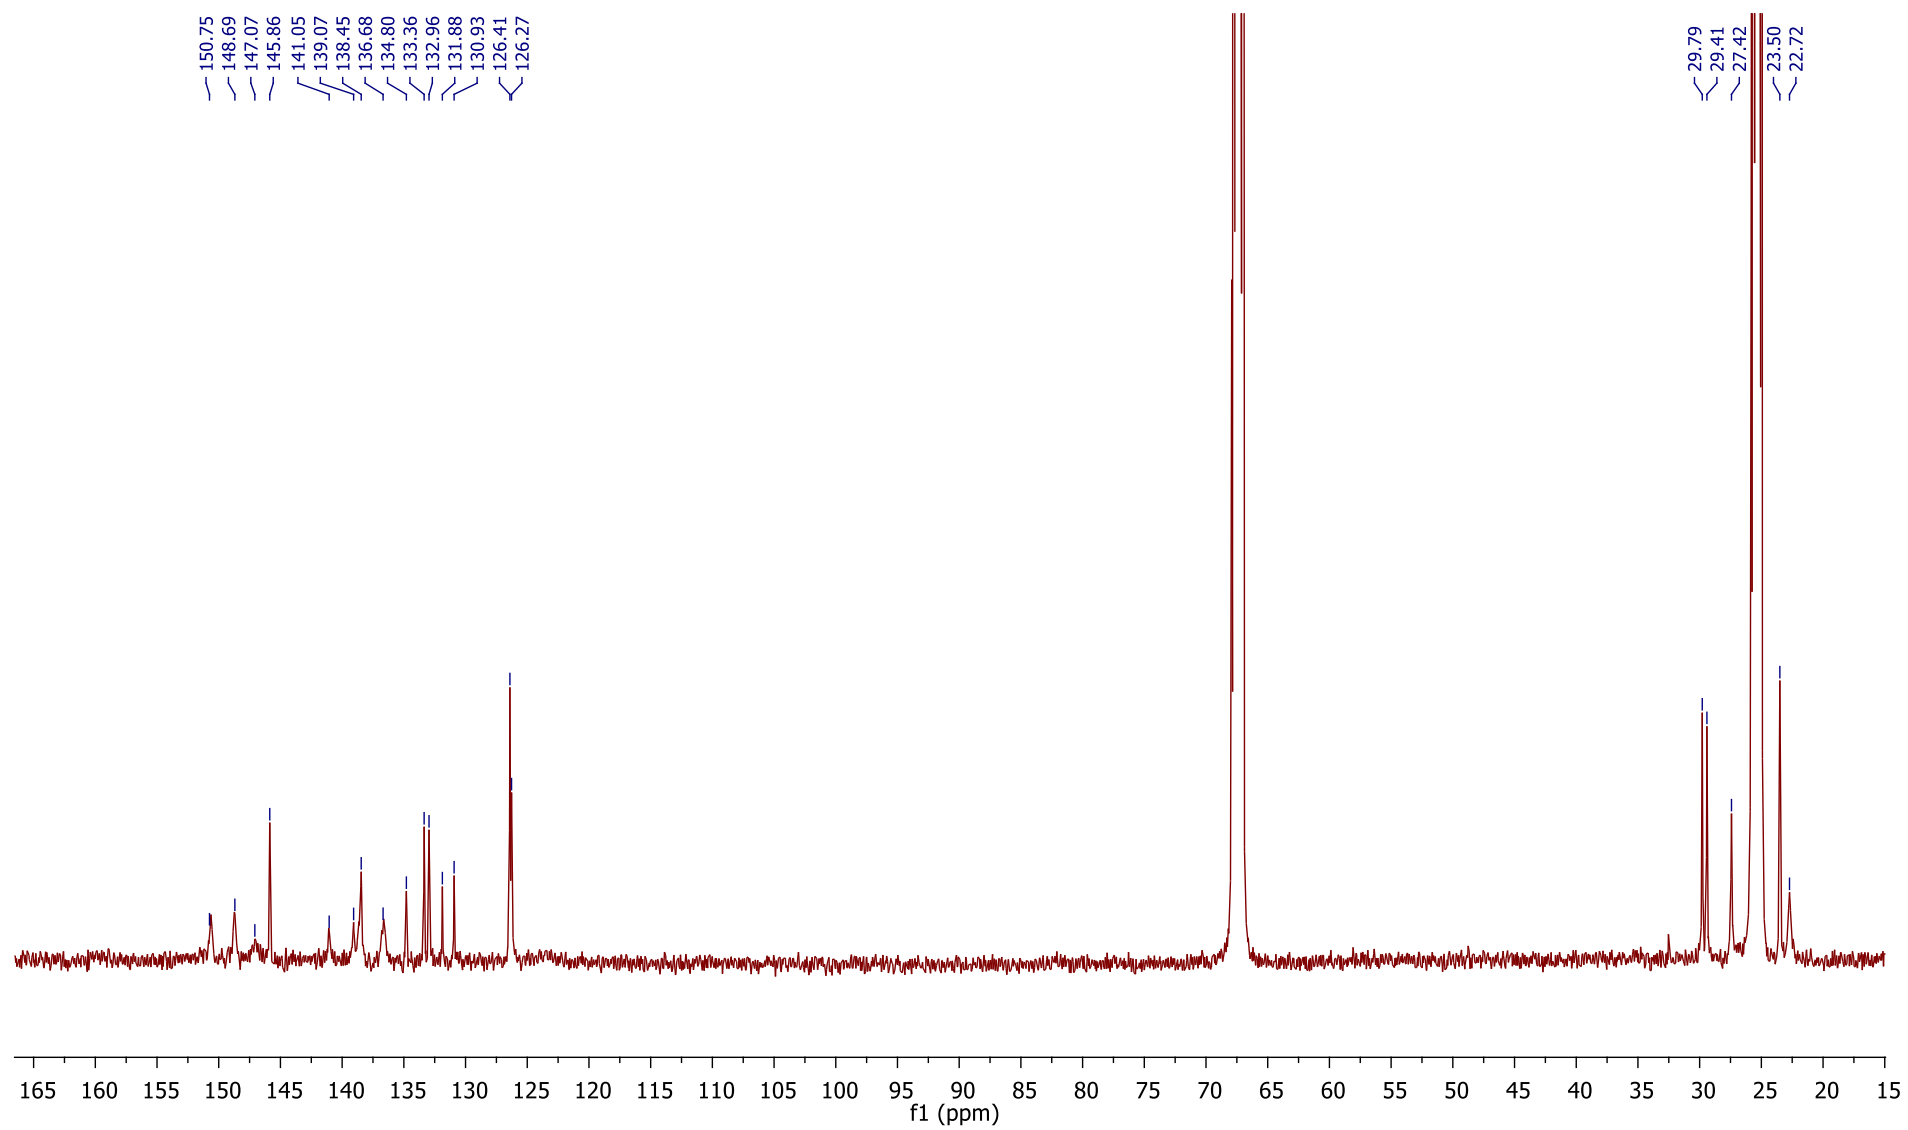

Figure S 48.  $^{13}\text{C}$  NMR spectrum (126 MHz,  $\text{THF-}d_8$ , 298K) of  $(\text{WCA-IDipp})_2\text{S}_2$  (**13**).

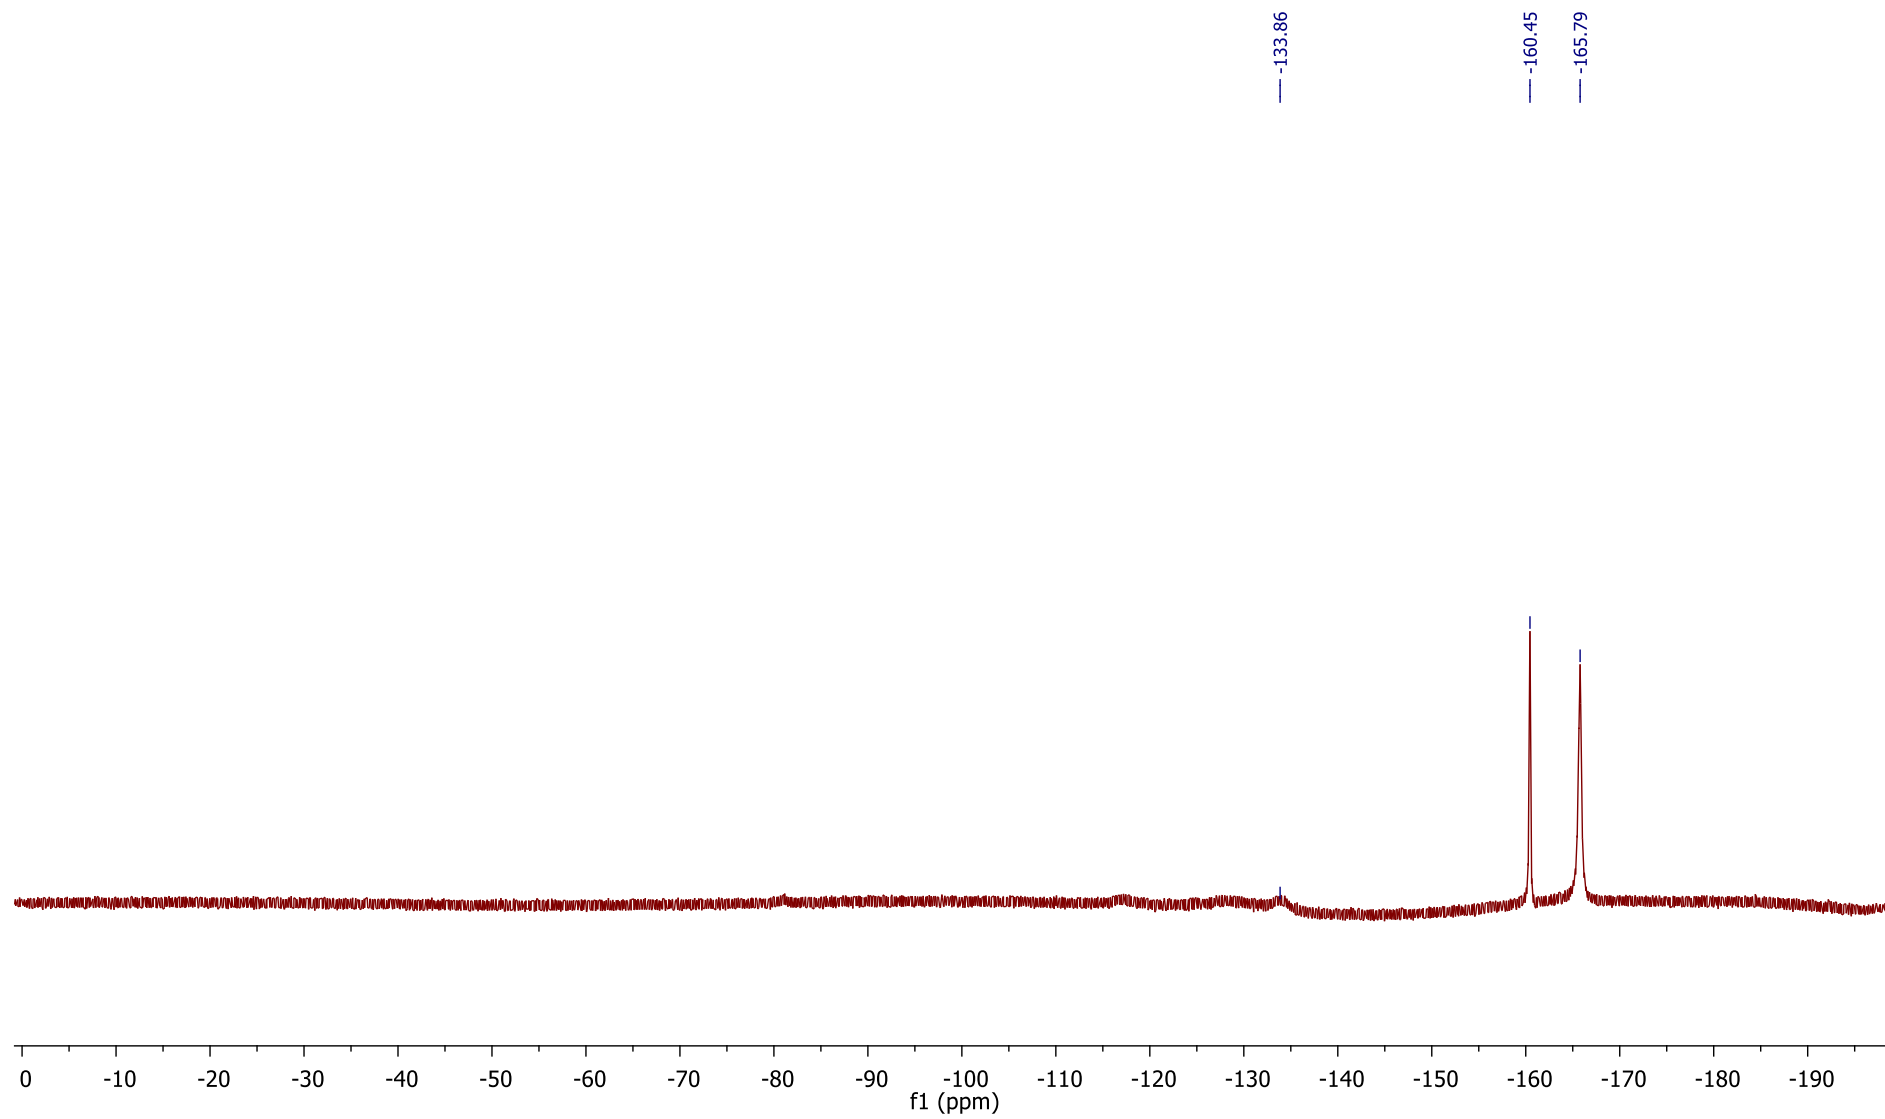

Figure S 49.  $^{19}\text{F}$  NMR spectrum (377 MHz,  $\text{THF-}d_8$ , 298K) of  $(\text{WCA-IDipp})_2\text{S}_2$  (**13**).

S2.10 (WCA-IDipp)<sub>2</sub>Se<sub>2</sub> (**14**)

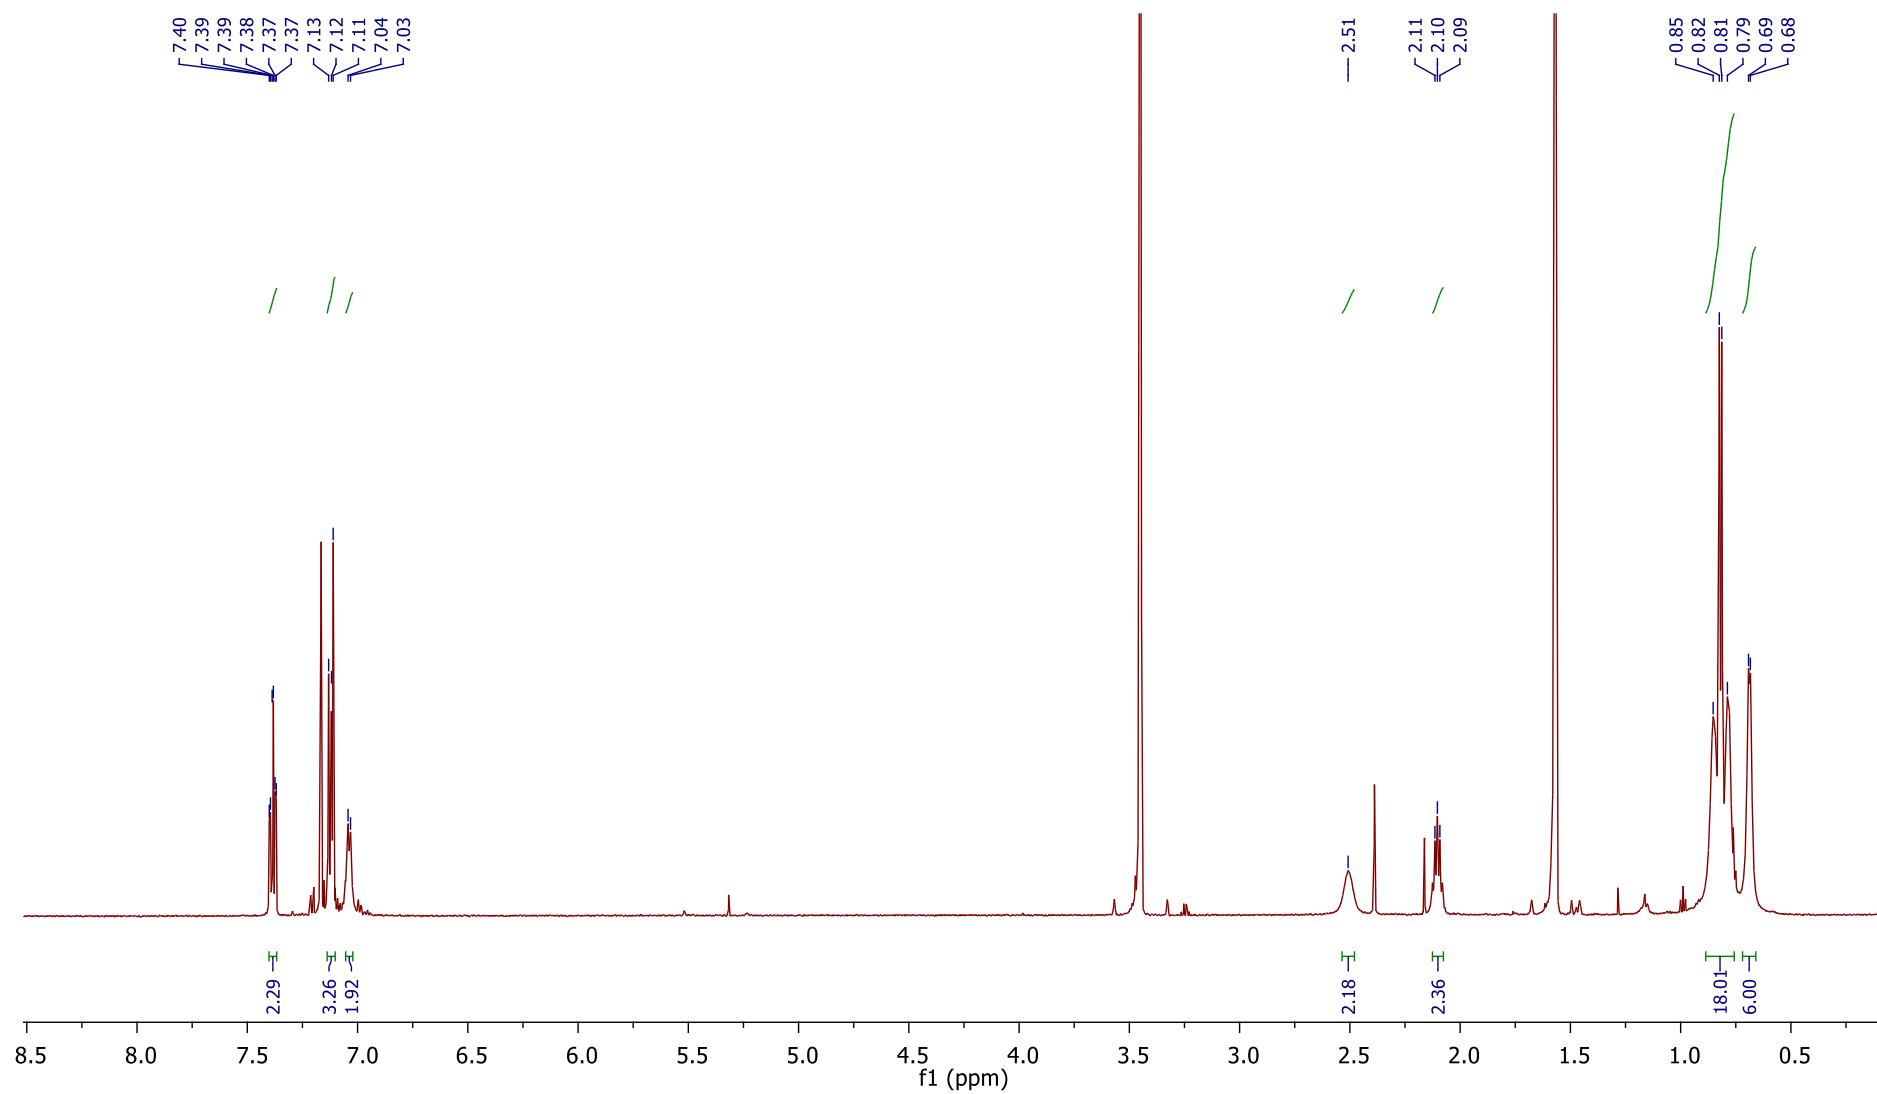

Figure S 50. <sup>1</sup>H NMR spectrum (600 MHz, THF-*d*<sub>8</sub>, 298K) of (WCA-IDipp)<sub>2</sub>Se<sub>2</sub> (**14**).

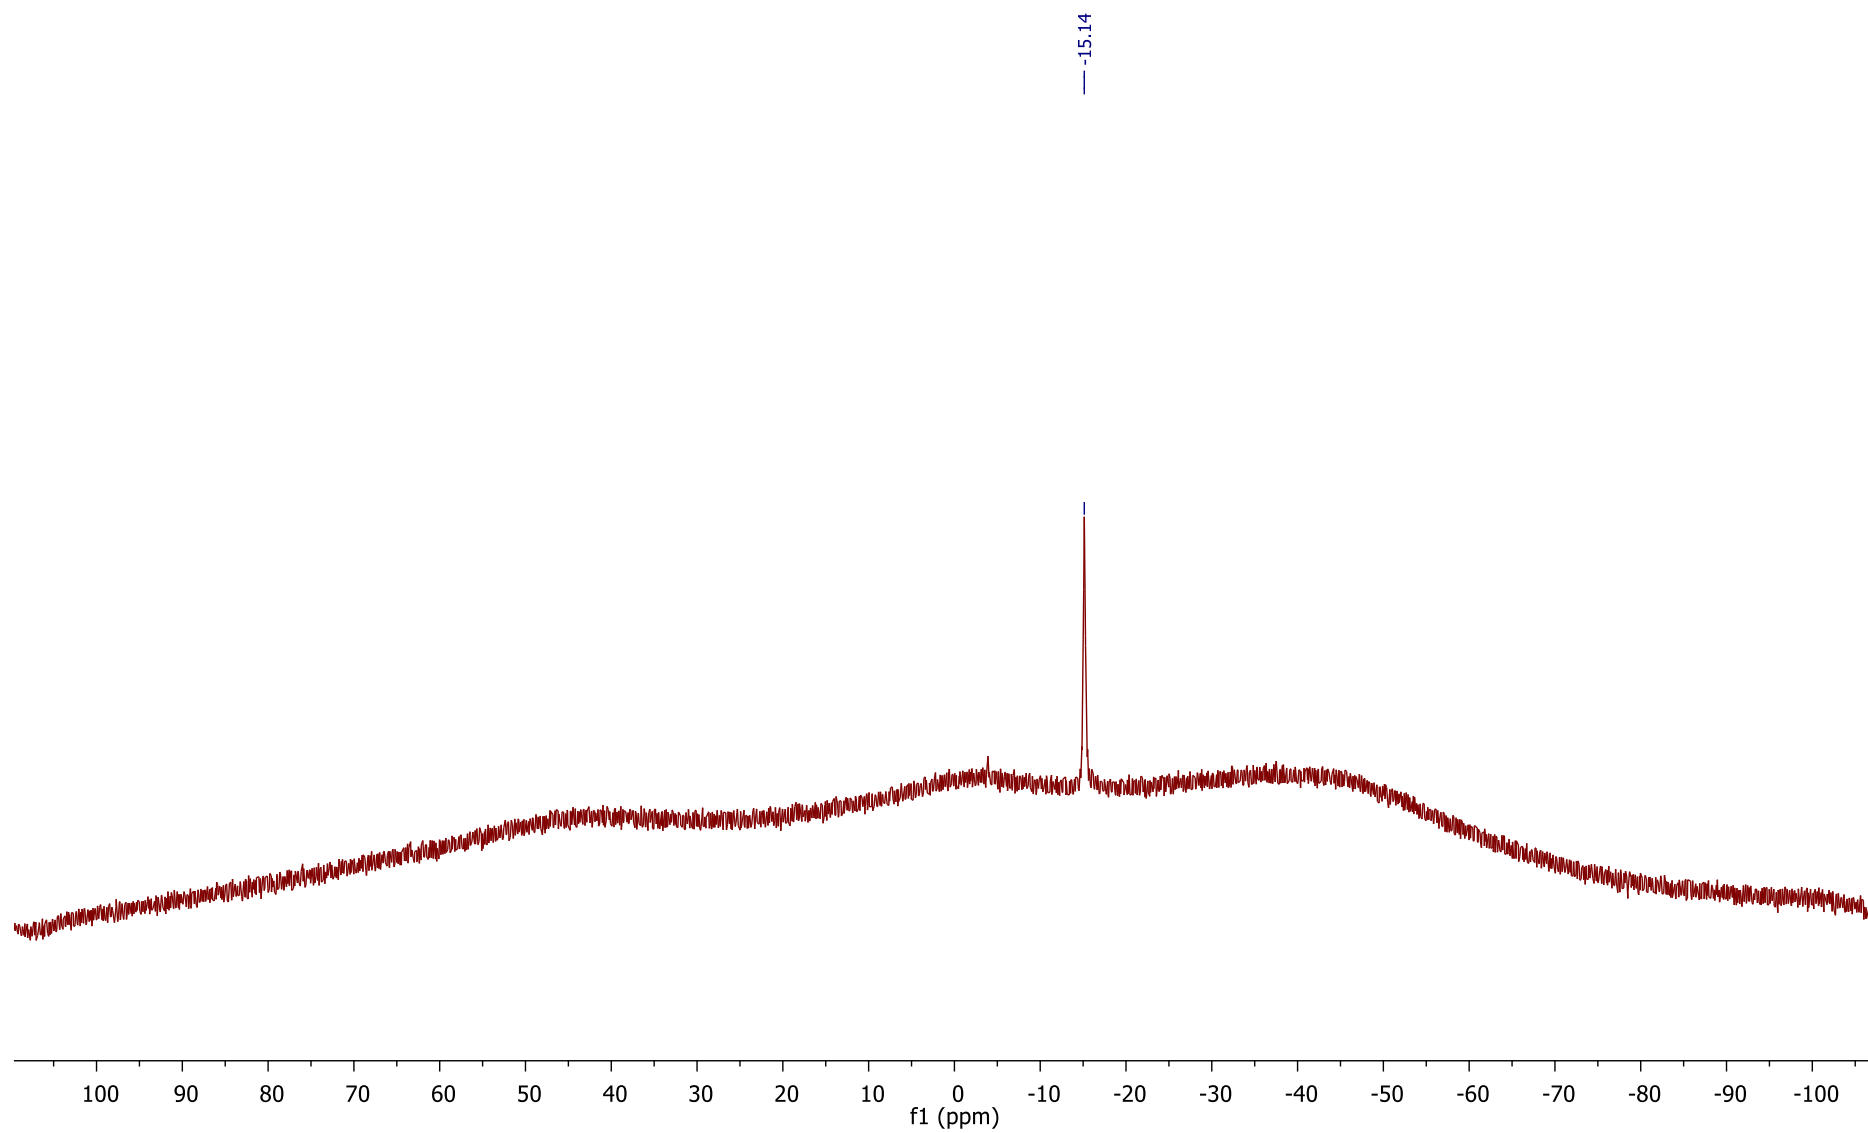

Figure S 51.  $^{11}\text{B}$  NMR spectrum (96 MHz,  $\text{THF-}d_8$ , 298K) of  $(\text{WCA-IDipp})_2\text{Se}_2$  (**14**).



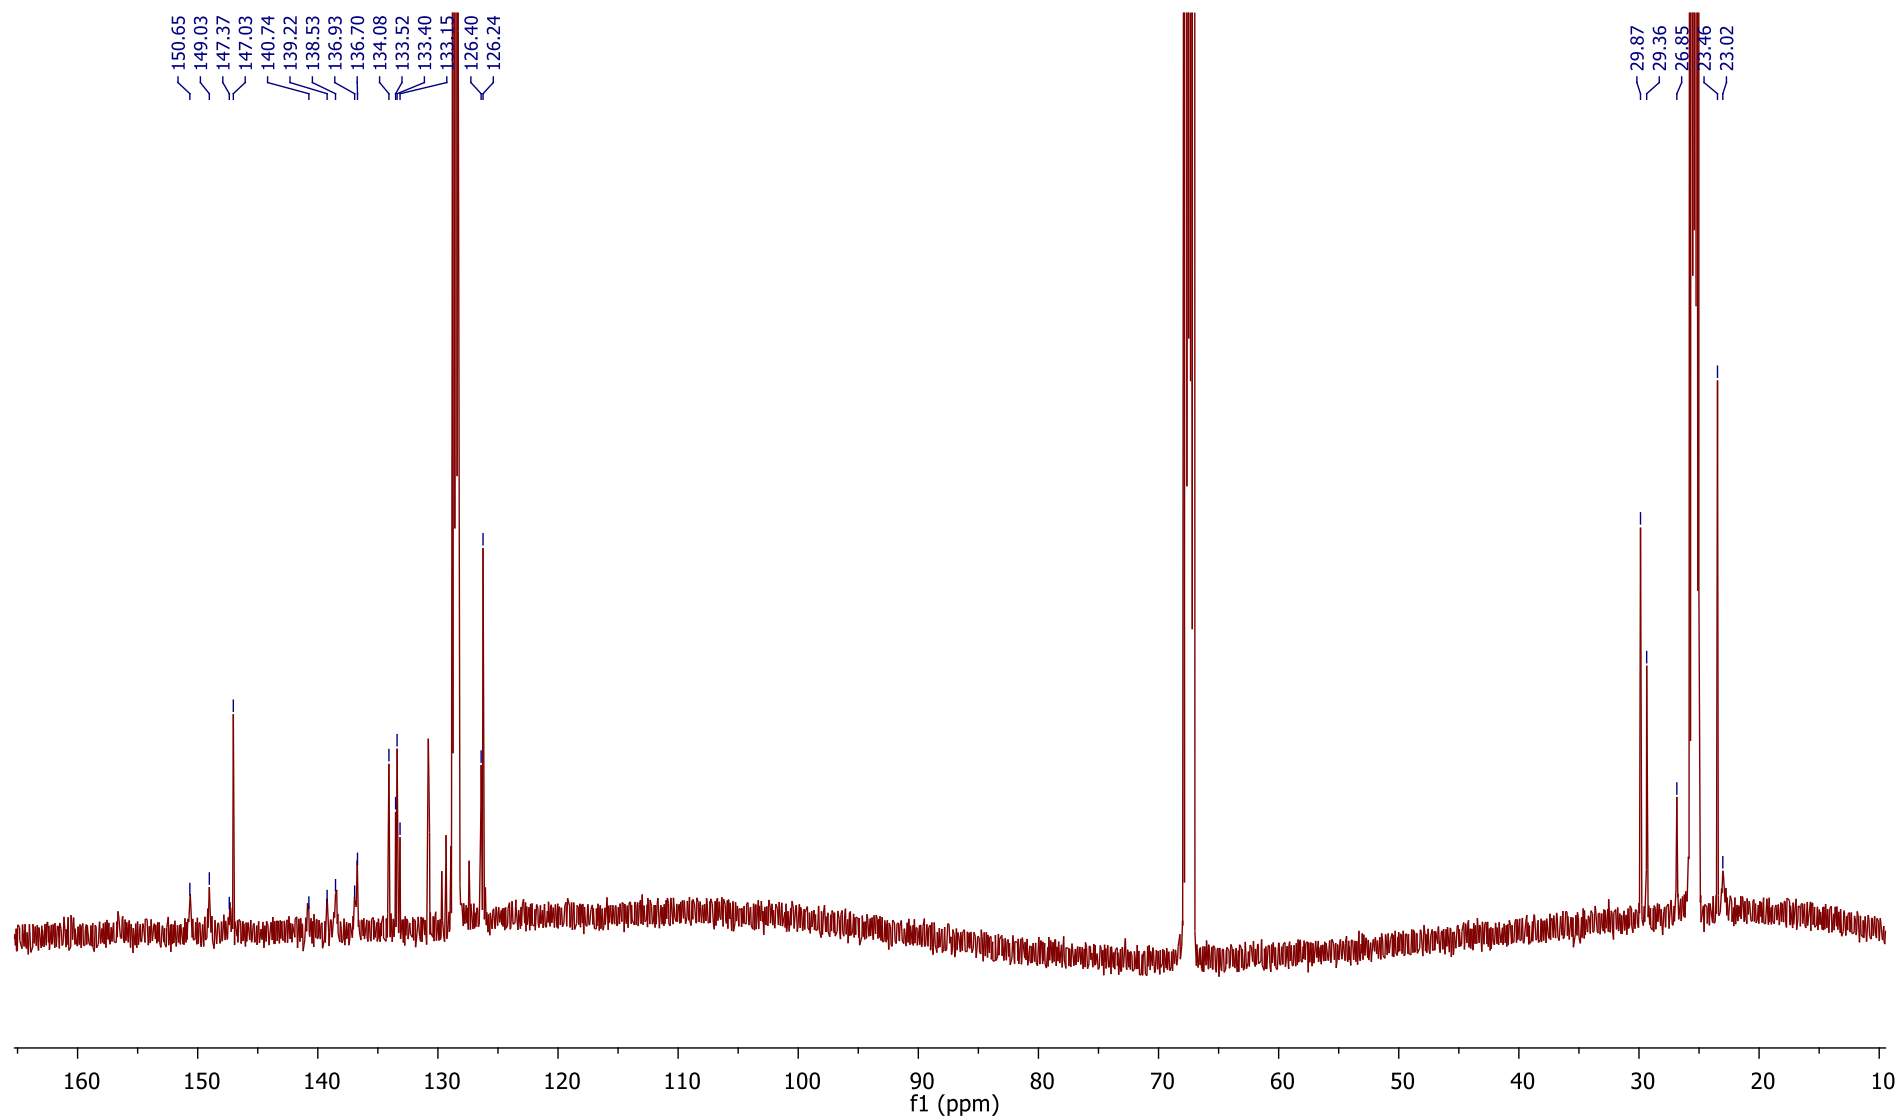

Figure S 52.  $^{13}\text{C}$  NMR spectrum (151 MHz,  $\text{THF-}d_8$ , 298K) of  $(\text{WCA-IDipp})_2\text{Se}_2$  (**14**).

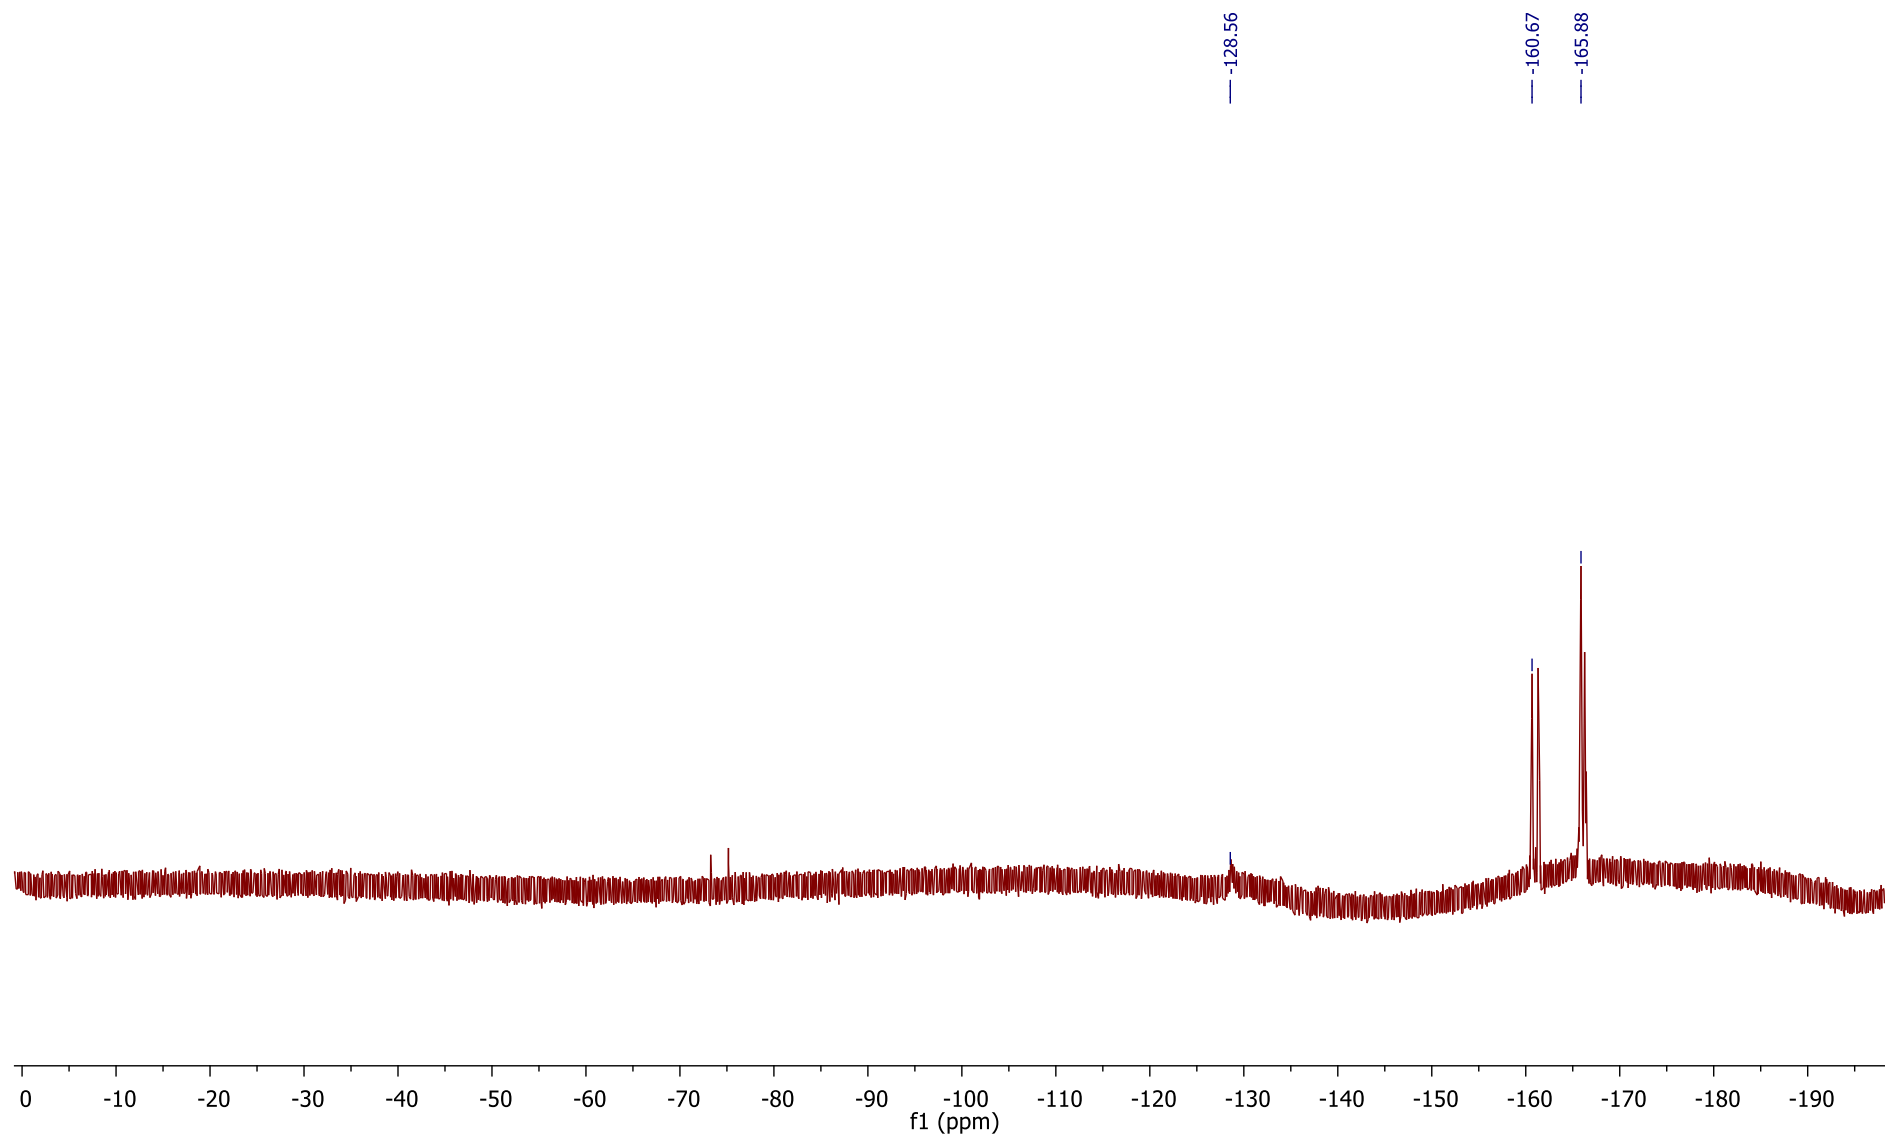

Figure S 53.  $^{19}\text{F}$  NMR spectrum (377 MHz,  $\text{THF-}d_8$ , 298K) of  $(\text{WCA-IDipp})_2\text{Se}_2$  (**14**).

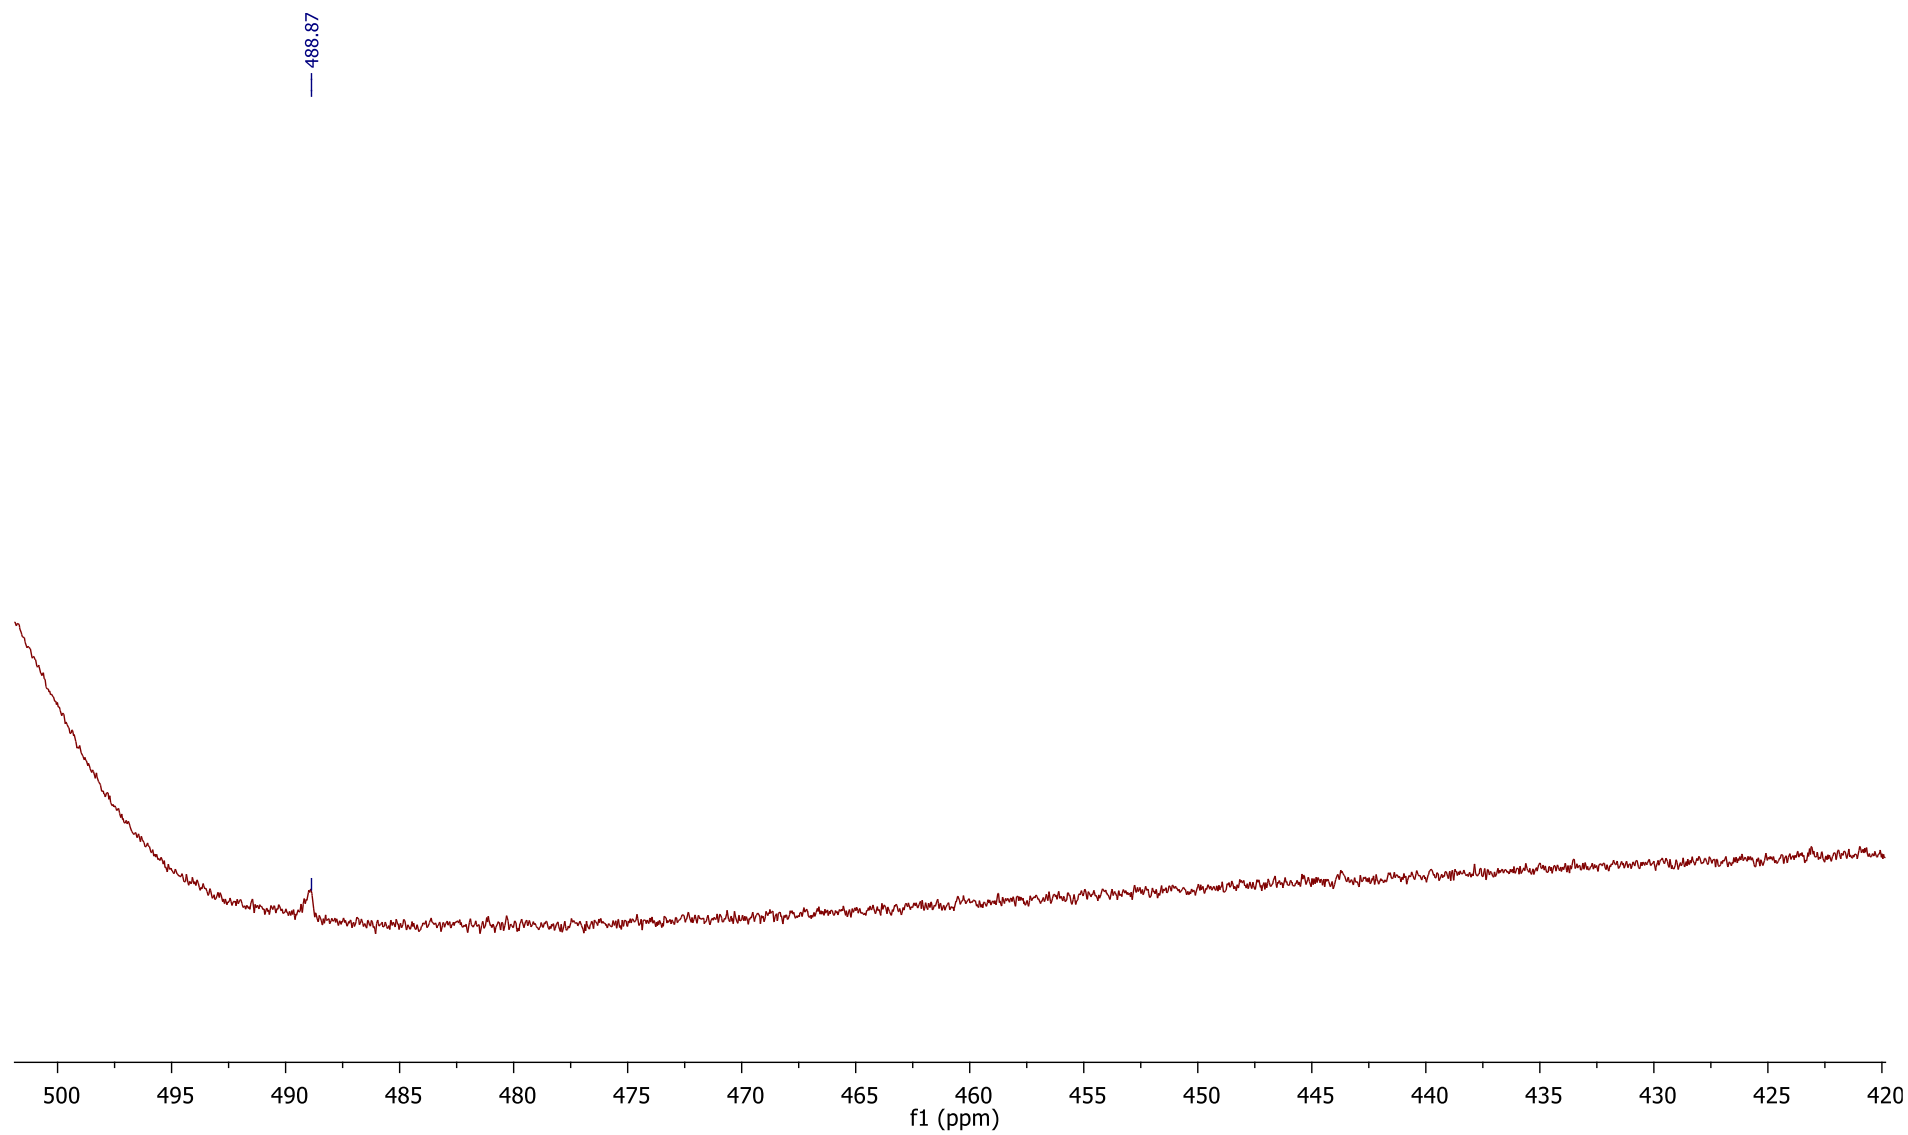

**Figure S 54.**  $^{77}\text{Se}$  NMR spectrum (75 MHz,  $\text{THF-}d_8$ , 298 K) of  $(\text{WCA-IDipp})_2\text{Se}_2$  (**14**).

### S3 Computational Details

All computations were performed using the density functional method B97-D<sup>[3]</sup> (S. Grimme) as implemented in the Gaussian09 program.<sup>[4]</sup> For all main group elements (C, H, B, F, P and As) the all-electron triple- $\zeta$  basis set (6-311G\*\*) was used.<sup>[5]</sup> Natural Bond Orbital (NBO) analysis (Wiberg Bond Index, WBI) was carried out using NBO version 3,<sup>[6]</sup> which is part of the Gaussian09 program package.

**Table S3.1** Energies for all optimized structures of the adducts (WCA<sup>a</sup>-IDipp)EH (E = O, S, Se) and (IDipp)EH (E = N, P, As)

| Compound                     | $E_{0K}^b$ [Ha] | $E_{298K}^c$ [Ha] | $H_{298K}^c$ [Ha] | $G_{298K}^c$ [Ha] |
|------------------------------|-----------------|-------------------|-------------------|-------------------|
| (WCA-IDipp)OH ( <b>10</b> )  | -3441.684434    | -3441.622764      | -3441.621820      | -3441.781032      |
| (WCA-IDipp)SH ( <b>11</b> )  | -3764.698570    | -3764.636505      | -3764.635561      | -3764.794647      |
| (WCA-IDipp)SeH ( <b>12</b> ) | -5769.229240    | -5769.166543      | -5769.165599      | -5769.328550      |
| (IDipp)NH ( <b>II</b> )      | -1214.297694    | -1214.266311      | -1214.265366      | -1214.358301      |
| (IDipp)PH ( <b>III</b> )     | -1500.919742    | -1500.887217      | -1500.886273      | -1500.982810      |
| (IDipp)AsH ( <b>IV</b> )     | -3396.537302    | -3396.504296      | -3396.503352      | -3396.602261      |

<sup>a</sup> weakly coordinating anionic (WCA) borate moiety B(C<sub>6</sub>F<sub>5</sub>)<sub>3</sub>.

<sup>b</sup> DFT energy incl. ZPE.

<sup>c</sup> standard conditions T = 298.15 K and p = 1 atm.

**Table S3.2** NBO analysis of (WCA-IDipp)OH (**10**)

|                            | bond no. | type             | element | WBI  | NBO charge | coefficient | localization [%] | AO contribution [%] |     |   |
|----------------------------|----------|------------------|---------|------|------------|-------------|------------------|---------------------|-----|---|
|                            |          |                  |         |      |            |             |                  | s                   | p   | d |
| (WCA-IDipp)OH ( <b>9</b> ) | 1.       | $\sigma$ (C-O)   | C       | 1.09 | 0.76       | 0.58        | 34               | 30                  | 70  | 0 |
|                            |          |                  | O       |      | -0.63      |             |                  |                     |     |   |
|                            | 2.       | $\sigma$ (O-H)   | O       | 0.73 | ---        | 0.87        | 75               | 20                  | 80  | 0 |
|                            |          |                  | H       |      | 0.50       |             |                  |                     |     |   |
|                            | 186.     | LP(O)            | O       | ---  | ---        | ---         | 100              | 46                  | 54  | 0 |
|                            | 187.     | LP(O)            | O       | ---  | ---        | ---         | 100              | 0                   | 100 | 0 |
|                            | 1248.    | $\sigma^*$ (C-O) | C       | ---  | ---        | -0.82       | 66               | 30                  | 70  | 0 |
|                            |          |                  | O       |      | ---        |             |                  |                     |     |   |
|                            | 1249.    | $\sigma^*$ (O-H) | O       | ---  | ---        | 0.50        | 75               | 20                  | 80  | 0 |
|                            |          |                  | H       |      | ---        |             |                  |                     |     |   |

**Table S3.3** NBO analysis of (WCA-IDipp)SH (11)

|                    | bond no. | type                   | element | WBI  | NBO charge | coefficient | localization [%] | AO contribution [%] |     |   |
|--------------------|----------|------------------------|---------|------|------------|-------------|------------------|---------------------|-----|---|
|                    |          |                        |         |      |            |             |                  | S                   | p   | d |
| (WCA-IDipp)SH (10) | 1.       | $\sigma(\text{C-S})$   | C       | 1.14 | 0.30       | 0.74        | 55               | 33                  | 67  | 0 |
|                    |          |                        | S       |      | 0.11       | 0.67        | 45               | 18                  | 81  | 1 |
|                    | 2.       | $\sigma(\text{S-H})$   | S       | 0.94 | ---        | 0.76        | 75               | 13                  | 87  | 0 |
|                    |          |                        | H       |      | 0.16       | 0.65        | 42               | 100                 | 0   | 0 |
|                    | 191.     | LP(S)                  | S       | ---  | ---        | ---         | 100              | 69                  | 31  | 0 |
|                    | 192.     | LP(S)                  | S       | ---  | ---        | ---         | 100              | 0                   | 100 | 0 |
|                    | 1255.    | $\sigma^*(\text{C-S})$ | C       | ---  | ---        | -0.67       | 45               | 33                  | 67  | 0 |
|                    |          |                        | S       |      | ---        | 0.74        | 55               | 18                  | 81  | 1 |
|                    | 1249.    | $\sigma^*(\text{S-H})$ | S       | ---  | ---        | 0.65        | 42               | 13                  | 87  | 0 |
|                    |          |                        | H       |      | ---        | -0.76       | 75               | 100                 | 0   | 0 |

**Table S3.4** NBO analysis of (WCA-IDipp)SeH (12)

|                     | bond no. | type                    | element | WBI  | NBO charge | coefficient | localization [%] | AO contribution [%] |     |   |
|---------------------|----------|-------------------------|---------|------|------------|-------------|------------------|---------------------|-----|---|
|                     |          |                         |         |      |            |             |                  | S                   | p   | d |
| (WCA-IDipp)SeH (11) | 1.       | $\sigma(\text{C-Se})$   | C       | 1.08 | 0.26       | 0.77        | 59               | 33                  | 67  | 0 |
|                     |          |                         | Se      |      | 0.21       | 0.64        | 41               | 14                  | 86  | 0 |
|                     | 2.       | $\sigma(\text{Se-H})$   | Se      | 0.95 | ---        | 0.75        | 56               | 11                  | 89  | 0 |
|                     |          |                         | H       |      | 0.11       | 0.67        | 44               | 100                 | 0   | 0 |
|                     | 200.     | LP(Se)                  | Se      | ---  | ---        | ---         | 100              | 76                  | 24  | 0 |
|                     | 201.     | LP(Se)                  | Se      | ---  | ---        | ---         | 100              | 0                   | 100 | 0 |
|                     | 1273.    | $\sigma^*(\text{C-Se})$ | C       | ---  | ---        | -0.64       | 41               | 33                  | 67  | 0 |
|                     |          |                         | Se      |      | ---        | 0.77        | 59               | 14                  | 86  | 0 |
|                     | 1274.    | $\sigma^*(\text{Se-H})$ | Se      | ---  | ---        | 0.67        | 44               | 11                  | 89  | 0 |
|                     |          |                         | H       |      | ---        | -0.75       | 56               | 100                 | 0   | 0 |

**Table S3.5** NBO analysis of (IDipp)NH (II)

|                | bond no. | type                   | element | WBI  | NBO charge | coefficient | localization [%] | AO contribution [%] |     |   |
|----------------|----------|------------------------|---------|------|------------|-------------|------------------|---------------------|-----|---|
|                |          |                        |         |      |            |             |                  | s                   | p   | d |
| (IDipp)NH (II) | 7.       | $\sigma(\text{C-N})$   | C       | 1.65 | 0.60       | 0.66        | 43               | 40                  | 60  | 0 |
|                |          |                        | N       |      | -0.80      | 0.76        | 57               | 40                  | 60  | 0 |
|                | 8.       | $\pi(\text{C-N})$      | C       | ---  | ---        | 0.59        | 34               | 0                   | 100 | 0 |
|                |          |                        | N       |      | ---        | 0.81        | 66               | 0                   | 100 | 0 |
|                | 77.      | $\sigma(\text{N-H})$   | N       | 0.85 | ---        | 0.82        | 67               | 20                  | 80  | 0 |
|                |          |                        | H       |      | 0.34       | 0.58        | 33               | 100                 | 0   | 0 |
|                | 110.     | LP(N)                  | N       | ---  | ---        | ---         | 100              | 40                  | 60  | 0 |
|                | 692.     | $\sigma^*(\text{C-N})$ | C       | ---  | ---        | 0.76        | 57               | 40                  | 60  | 0 |
|                |          |                        | N       |      | ---        | -0.66       | 43               | 40                  | 60  | 0 |
|                | 693.     | $\pi^*(\text{C-N})$    | C       | ---  | ---        | 0.81        | 66               | 0                   | 100 | 0 |
|                |          |                        | N       |      | ---        | -0.59       | 34               | 0                   | 100 | 0 |
|                | 762.     | $\sigma^*(\text{N-H})$ | N       | ---  | ---        | -0.58       | 33               | 20                  | 80  | 0 |
|                |          |                        | H       |      | ---        | 0.82        | 67               | 100                 | 0   | 0 |

**Table S3.6** NBO analysis of (IDipp)PH (III)

|                 | bond no. | type                   | element | WBI  | NBO charge | coefficient | localization [%] | AO contribution [%] |     |   |
|-----------------|----------|------------------------|---------|------|------------|-------------|------------------|---------------------|-----|---|
|                 |          |                        |         |      |            |             |                  | s                   | p   | d |
| (IDipp)PH (III) | 7.       | $\sigma(\text{C-P})$   | C       | 1.37 | 0.10       | 0.82        | 67               | 43                  | 57  | 0 |
|                 |          |                        | P       |      | -0.04      | 0.57        | 33               | 18                  | 81  | 1 |
|                 | 8.       | $\pi(\text{C-P})$      | C       | ---  | ---        | 0.59        | 35               | 0                   | 100 | 0 |
|                 |          |                        | P       |      | ---        | 0.81        | 65               | 0                   | 100 | 0 |
|                 | 77.      | $\sigma(\text{P-H})$   | P       | 0.96 | ---        | 0.69        | 48               | 14                  | 86  | 0 |
|                 |          |                        | H       |      | -0.02      | 0.72        | 52               | 100                 | 0   | 0 |
|                 | 114.     | LP(P)                  | P       | ---  | ---        | ---         | 100              | 69                  | 31  | 0 |
|                 | 700.     | $\sigma^*(\text{C-P})$ | C       | ---  | ---        | 0.57        | 33               | 43                  | 57  | 0 |
|                 |          |                        | P       |      | ---        | -0.82       | 67               | 18                  | 81  | 1 |
|                 | 701.     | $\pi^*(\text{C-P})$    | C       | ---  | ---        | 0.81        | 65               | 0                   | 100 | 0 |
|                 |          |                        | P       |      | ---        | -0.59       | 35               | 0                   | 100 | 0 |
|                 | 770      | $\sigma^*(\text{P-H})$ | P       | ---  | ---        | 0.72        | 52               | 14                  | 86  | 0 |
| H               |          |                        | ---     |      | -0.69      | 48          | 100              | 0                   | 0   |   |

**Table S3.7** NBO analysis of (IDipp)AsH (IV)

|                 | bond no. | type                    | element | WBI  | NBO charge | coefficient | localization [%] | AO contribution [%] |     |   |
|-----------------|----------|-------------------------|---------|------|------------|-------------|------------------|---------------------|-----|---|
|                 |          |                         |         |      |            |             |                  | S                   | p   | d |
| (IDipp)AsH (IV) | 7.       | $\sigma(\text{C-As})$   | C       | 1.28 | 0.11       | 0.83        | 69               | 42                  | 58  | 0 |
|                 |          |                         | As      |      | -0.04      | 0.55        | 31               | 13                  | 87  | 0 |
|                 | 76.      | $\sigma(\text{As-H})$   | As      | 0.96 | ---        | 0.69        | 47               | 12                  | 88  | 0 |
|                 |          |                         | H       |      | -0.04      | 0.73        | 53               | 0                   | 100 | 0 |
|                 | 123.     | LP(As)                  | As      | ---  | ---        | ---         | 100              | 76                  | 24  | 0 |
|                 | 124.     | LP(As)                  | As      | ---  | ---        | ---         | 100              | 0                   | 100 | 0 |
|                 | 719.     | $\sigma^*(\text{C-As})$ | C       | ---  | ---        | 0.55        | 31               | 42                  | 58  | 0 |
|                 |          |                         | As      |      | ---        | -0.83       | 69               | 13                  | 87  | 0 |
|                 | 788.     | $\sigma^*(\text{As-H})$ | As      | ---  | ---        | 0.73        | 53               | 12                  | 88  | 0 |
|                 |          |                         | H       |      | ---        | -0.69       | 47               | 0                   | 100 | 0 |

## S4 References

- [1] CrysAlisPRO, Oxford Diffraction/Agilent Technologies UK Ltd, Yarnton, England.
- [2] G. M. Sheldrick, *Acta Crystallogr., Sect. A: Found. Crystallogr.*, 2008, **64**, 112.
- [3] S. Grimme, *J. Comp. Chem.*, 2006, **27**, 1787.
- [4] Gaussian 09, Revision A.1, M. J. Frisch, G. W. Trucks, H. B. Schlegel, G. E. Scuseria, M. A. Robb, J. R. Cheeseman, G. Scalmani, V. Barone, B. Mennucci, G. A. Petersson, H. Nakatsuji, M. Caricato, X. Li, H. P. Hratchian, A. F. Izmaylov, J. Bloino, G. Zheng, J. L. Sonnenberg, M. Hada, M. Ehara, K. Toyota, R. Fukuda, J. Hasegawa, M. Ishida, T. Nakajima, Y. Honda, O. Kitao, H. Nakai, T. Vreven, J. A. Montgomery, Jr., J. E. Peralta, F. Ogliaro, M. Bearpark, J. J. Heyd, E. Brothers, K. N. Kudin, V. N. Staroverov, R. Kobayashi, J. Normand, K. Raghavachari, A. Rendell, J. C. Burant, S. S. Iyengar, J. Tomasi, M. Cossi, N. Rega, J. M. Millam, M. Klene, J. E. Knox, J. B. Cross, V. Bakken, C. Adamo, J. Jaramillo, R. Gomperts, R. E. Stratmann, O. Yazyev, A. J. Austin, R. Cammi, C. Pomelli, J. W. Ochterski, R. L. Martin, K. Morokuma, V. G. Zakrzewski, G. A. Voth, P. Salvador, J. J. Dannenberg, S. Dapprich, A. D. Daniels, Ö. Farkas, J. B. Foresman, J. V. Ortiz, J. Cioslowski and D. J. Fox, Gaussian, Inc., Wallingford CT, 2009.
- [5] X. Cao and M. Dolg, *J. Chem. Phys.*, 2001, **115**, 7348.
- [6] a) J. P. Foster and F. Weinhold, *J. Am. Chem. Soc.*, 1980, **102**, 7211; b) A. E. Reed and F. Weinhold, *J. Chem. Phys.*, 1983, **78**, 4066; c) A. E. Reed, R. B. Weinstock and F. Weinhold, *J. Chem. Phys.*, 1985, **83**, 735; d) A. E. Reed and F. Weinhold, *J. Chem. Phys.*, 1985, **83**, 1736.
